# Supplementary material for: Catalytic [2+2] and [3+2] cycloaddition reactions of allenoates with cyclic ketimines
Source: Royal Society of Chemistry journal article supplement (doi:10.1039/c2cc16055b), 2011-12-17

# Catalytic [2 + 2] and [3 + 2] cycloaddition reactions of allenones with cyclic ketimines

Xiang-Yu Chen, Ruo-Chen Lin and Song Ye\*

Beijing National Laboratory for Molecular Sciences, Key Laboratory of Molecular  
Recognition and Function, Institute of Chemistry, Chinese Academy of Sciences,  
Beijing 100190, China

songye@iccas.ac.cn

## Table of Contents

|                                                                       |    |
|-----------------------------------------------------------------------|----|
| Part I General Information.....                                       | 2  |
| Part II Experimental part.....                                        | 2  |
| 1. Materials.....                                                     | 2  |
| 2. DABCO-catalyzed [2 + 2] cycloaddition (Table 2). ....              | 3  |
| 3. PPh <sub>3</sub> -catalyzed [3 + 2] cycloaddition (Table 3).....   | 13 |
| 4. PBu <sub>3</sub> -catalyzed [3 + 2] cycloaddition (Scheme 1). .... | 22 |
| 5. Chiral catalysts for the reactions (Table S1). ....                | 24 |
| 6. Control experiments for expansion of cycloadduct 3j to 4j/5j ..... | 24 |
| 7. X-Ray structures of cycloadduct 3a and 5a (Fig. S1 and S2).....    | 25 |
| 8. References.....                                                    | 26 |
| Part III NMR Spectra.....                                             | 27 |

## Part I General Information

Unless otherwise indicated, all reactions were carried out under N<sub>2</sub> atmosphere in oven-dried glassware with magnetic stirring. Anhydrous THF and toluene were distilled from sodium and benzophenone. Anhydrous CH<sub>2</sub>Cl<sub>2</sub> was distilled from CaH<sub>2</sub>. Column chromatograph was performed on silica gel 200~300 mesh. All <sup>1</sup>H NMR (300 MHz), <sup>13</sup>C NMR (75 MHz) spectra were recorded on a Bruker-DMX 300 spectrometer in CDCl<sub>3</sub>, with tetramethylsilane as an internal standard and reported in parts per million (ppm, δ). <sup>1</sup>H NMR Spectroscopy splitting patterns were designated as singlet (s), doublet (d), triplet (t). Splitting patterns that could not be interpreted or easily visualized were designated as multiplet (m) or broad (br). Infrared spectra were recorded on a JASCO FT/IR-480 spectrophotometer and reported as wave number (cm<sup>-1</sup>).

## Part II Experimental part

### 1. Materials

Both cyclic ketimines<sup>1</sup> and ethyl 2,3-butadienoate<sup>2</sup> were prepared according to literature methods.

## 2. DABCO-catalyzed [2 + 2] cycloaddition (Table 2).

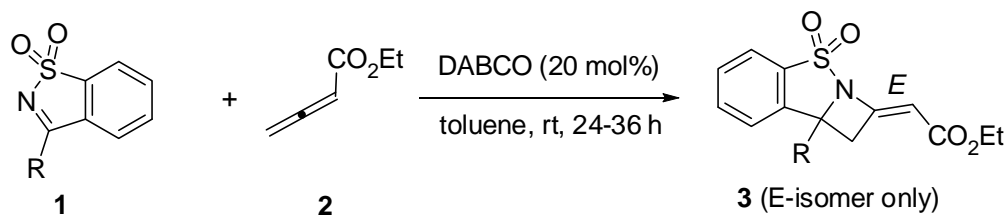

To a stirred solution of cyclic ketimines (0.2 mmol) and DABCO (4.5 mg, 0.04 mmol) in toluene (2 mL) was added ethyl 2,3-butadienoate (48.8 mg, 0.4 mmol). The reaction mixture was stirred for 24-36 h at room temperature until the full consumption of the cyclic ketimines. The reaction mixture was concentrated under reduced pressure, and the residue was purified by column chromatography on silica gel (petroleum ether/EtOAc, typically 10:1-5:1) to furnish the corresponding [2+2] cycloadduct **3**.

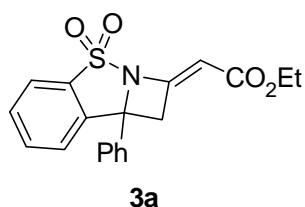

**(E)-ethyl 2-(4,4-dioxido-8b-phenyl-1H-azeto[1,2-b]benzo[d]isothiazol-2-(8bH)-ylidene)acetate**

Reaction time: 24 h; Yield: 61 mg, 86%; white solid; mp 154 °C;  $R_f = 0.25$  (petroleum ether/ethyl acetate = 3:1);  $^1\text{H NMR}$  (300 MHz,  $\text{CDCl}_3$ ):  $\delta$  7.77 (d,  $J = 7.7$  Hz, 1H), 7.71-7.51 (m, 4H), 7.49-7.29 (m, 4H), 5.94 (t,  $J = 2.3$  Hz, 1H), 4.11 (q,  $J = 7.2$  Hz, 2H), 4.04 (dd,  $J = 17.1, 2.3$  Hz, 1H), 3.76 (dd,  $J = 17.1, 2.3$  Hz, 1H), 1.23 (t,  $J = 7.1$  Hz, 3H).  $^{13}\text{C NMR}$  (75 MHz,  $\text{CDCl}_3$ ):  $\delta$  166.1, 155.9, 143.0, 139.1, 136.2,

134.2, 130.1, 129.0, 128.6, 125.3, 124.9, 122.1, 104.8, 76.9, 60.1, 43.2, 14.3. **IR**  
**(KBr)**: 1713, 1671, 1449, 1336, 1181, 1111, 763, 573, 526. **HRMS (EI)** calcd for  
 $C_{19}H_{17}NO_4S$   $[M]^+$  355.0878, found 355.0883.

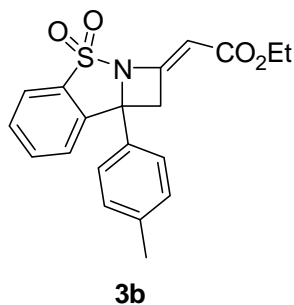

**(E)-ethyl 2-(4,4-dioxido-8b-(p-tolyl)-1H-azeto[1,2-b]benzo[d]isothiazol-2(8bH)-ylidene)acetate**

Reaction time: 36 h; Yield: 59 mg, 80%; white solid; mp 140 °C;  $R_f = 0.3$   
(petroleum ether/ethyl acetate = 3:1);  **$^1H$  NMR (300 MHz,  $CDCl_3$ )**:  $\delta$  7.77 (d,  $J = 7.8$   
Hz, 1H), 7.62 (d,  $J = 7.6$  Hz, 1H), 7.55 (t,  $J = 7.5$  Hz, 1H), 7.44 (t,  $J = 7.1$  Hz, 3H),  
7.21 (d,  $J = 8.0$  Hz, 2H), 5.94 (d,  $J = 2.1$  Hz, 1H), 4.11 (q,  $J = 7.1$  Hz, 2H), 4.03 (dd,  $J$   
= 17.1, 2.1 Hz, 1H), 3.73 (dd,  $J = 17.1, 2.1$  Hz, 1H), 2.34 (s, 3H), 1.23 (t,  $J = 7.1$  Hz,  
3H).  **$^{13}C$  NMR (75 MHz,  $CDCl_3$ )**:  $\delta$  166.2, 156.0, 143.2, 138.6, 136.3, 136.0, 134.2,  
130.0, 129.6, 125.3, 124.9, 122.1, 104.7, 76.9, 60.1, 43.0, 21.1, 14.3. **IR (KBr)**: 1713,  
1671, 1336, 1182, 1108, 1042, 821, 760, 584, 526. **HRMS (EI)** calcd for  $C_{20}H_{19}NO_4S$   
 $[M]^+$  369.1035, found 369.1039.

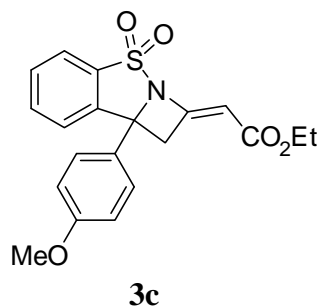

**(E)-ethyl 2-(8b-(4-methoxyphenyl)-4,4-dioxido-1H-azeto[1,2-b]benzo[d]isothiazol-2(8bH)-ylidene)acetate**

Reaction time: 36 h; Yield: 35 mg, 45%; white solid; mp 140 °C;  $R_f = 0.33$  (petroleum ether/ethyl acetate = 3:1);  **$^1\text{H NMR}$  (300 MHz,  $\text{CDCl}_3$ ):**  $\delta$  7.79 (d,  $J = 7.8$  Hz, 1H), 7.65-7.56 (m, 2H), 7.47 (d,  $J = 8.8$  Hz, 2H), 7.41 (d,  $J = 7.7$  Hz, 1H), 6.92 (d,  $J = 8.8$  Hz, 2H), 5.93 (t,  $J = 2.4$  Hz, 1H), 4.11 (q,  $J = 7.2$  Hz, 2H), 4.04 (dd,  $J = 17.2$ , 2.4 Hz, 1H), 3.80 (s, 3H), 3.70 (dd,  $J = 17.1$ , 2.3 Hz, 1H), 1.24 (t,  $J = 7.1$  Hz, 3H).  **$^{13}\text{C NMR}$  (75 MHz,  $\text{CDCl}_3$ ):**  $\delta$  166.3, 159.9, 156.0, 143.4, 136.5, 134.2, 130.9, 130.0, 127.1, 125.0, 122.2, 114.4, 104.7, 76.9, 60.1, 55.4, 43.0, 14.3. **IR (KBr):** 1713, 1670, 1514, 1336, 1254, 1180, 1108, 833, 530. **HRMS (EI)** calcd for  $\text{C}_{20}\text{H}_{19}\text{NO}_5\text{S}$   $[\text{M}]^+$  385.0948, found 385.0988.

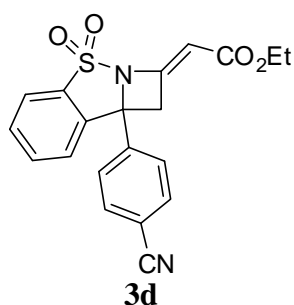

**(E)-ethyl 2-(8b-(4-cyanophenyl)-4,4-dioxido-1H-azeto[1,2-b]benzo[d]isothiazol-2(8bH)-ylidene)acetate**

Reaction time: 24 h; Yield: 53 mg, 70%; white solid; mp 146 °C;  $R_f = 0.2$  (petroleum ether/ethyl acetate = 3:1);  $^1\text{H NMR}$  (300 MHz,  $\text{CDCl}_3$ ):  $\delta$  7.82 (d,  $J = 7.6$  Hz, 1H), 7.78-7.58 (m, 6H), 7.46 (d,  $J = 7.7$  Hz, 1H), 5.96 (t,  $J = 2.2$  Hz, 1H), 4.12 (q,  $J = 7.1$  Hz, 2H), 3.99 (dd,  $J = 17.0, 2.2$  Hz, 1H), 3.81 (dd,  $J = 17.0, 2.3$  Hz, 1H), 1.24 (t,  $J = 7.1$  Hz, 3H).  $^{13}\text{C NMR}$  (75 MHz,  $\text{CDCl}_3$ ):  $\delta$  164.9, 153.8, 143.1, 140.6, 135.3, 133.6, 131.9, 129.6, 125.2, 123.6, 121.5, 117.1, 111.8, 104.3, 74.9, 59.3, 42.2, 13.2. IR (KBr): 2230, 1713, 1672, 1353, 1336, 1182, 1108, 843, 761, 578. HRMS (EI) calcd for  $\text{C}_{20}\text{H}_{16}\text{N}_2\text{O}_4\text{S}$   $[\text{M}]^+$  380.0831, found 380.0836.

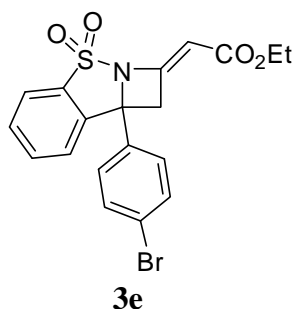

**(E)-ethyl 2-(8b-(4-bromophenyl)-4,4-dioxido-1H-azeto[1,2-b]benzo[d]isothiazol-2(8bH)-ylidene)acetate**

Reaction time: 24 h; Yield: 81 mg, 93%; white solid; mp 140 °C;  $R_f = 0.3$  (petroleum ether/ethyl acetate = 3:1);  $^1\text{H NMR}$  (300 MHz,  $\text{CDCl}_3$ ):  $\delta$  7.79 (d,  $J = 7.5$  Hz, 1H), 7.67 (dd,  $J = 10.7, 4.2$  Hz, 1H), 7.60 (d,  $J = 7.6$  Hz, 1H), 7.54 (d,  $J = 8.6$  Hz, 2H), 7.49-7.39 (m, 3H), 5.94 (t,  $J = 2.1$  Hz, 1H), 4.11 (q,  $J = 7.1$  Hz, 2H), 3.99 (dd,  $J = 17.0, 2.2$  Hz, 1H), 3.75 (dd,  $J = 17.0, 2.2$  Hz, 1H), 1.24 (t,  $J = 7.1$  Hz, 3H).  $^{13}\text{C NMR}$  (75 MHz,  $\text{CDCl}_3$ ):  $\delta$  166.0, 155.4, 142.4, 138.1, 136.3, 134.4, 132.2, 130.3, 127.1, 124.7, 123.0, 122.3, 105.0, 76.3, 60.2, 43.1, 14.3. IR (KBr): 1713, 1675, 1336,

1181, 1108, 994, 835, 759, 575. **HRMS (EI)** calcd for  $C_{19}H_{16}BrNO_4S$   $[M]^+$  432.9983, 434.9963, found 432.9987, 434.9970.

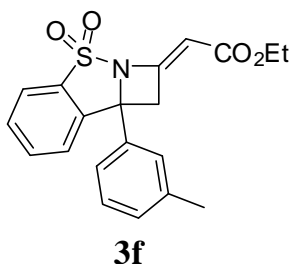

**(E)-ethyl 2-(4,4-dioxido-8b-(m-tolyl)-1H-azeto[1,2-b]benzo[d]isothiazol-2(8bH)-ylidene)acetate**

Reaction time: 36 h; Yield: 65 mg, 88%; white solid; mp 189 °C;  $R_f = 0.33$  (petroleum ether/ethyl acetate = 3:1);  **$^1H$  NMR (300 MHz,  $CDCl_3$ ):**  $\delta$  7.79 (d,  $J = 7.8$  Hz, 1H), 7.65 (td,  $J = 7.6, 1.1$  Hz, 1H), 7.57 (dd,  $J = 11.2, 3.8$  Hz, 1H), 7.45 (d,  $J = 7.7$  Hz, 1H), 7.37-7.30 (m, 3H), 7.16 (d,  $J = 7.3$  Hz, 1H), 5.93 (t,  $J = 2.3$  Hz, 1H), 4.11 (q,  $J = 7.1$  Hz, 2H), 4.03 (dd,  $J = 17.1, 2.3$  Hz, 1H), 3.74 (dd,  $J = 17.1, 2.4$  Hz, 1H), 2.37 (s, 3H), 1.24 (t,  $J = 7.1$  Hz, 3H).  **$^{13}C$  NMR (75 MHz,  $CDCl_3$ ):**  $\delta$  166.2, 156.0, 143.2, 139.1, 138.9, 136.3, 134.2, 130.1, 129.5, 128.9, 126.0, 124.9, 122.4, 122.2, 104.8, 77.0, 60.1, 43.3, 21.6, 14.3. **IR (KBr):** 1713, 1671, 1336, 1182, 1112, 1039, 843, 761, 575. **HRMS (EI)** calcd for  $C_{20}H_{19}NO_4S$   $[M]^+$  369.1035, found 369.1040.

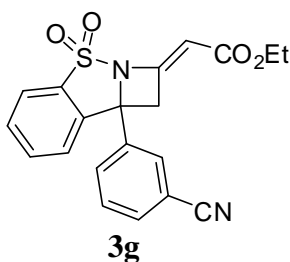

**(E)-ethyl 2-(8b-(3-cyanophenyl)-4,4-dioxido-1H-azeto[1,2-b]benzo[d]isothiazol-**

### 2(8bH)-ylidene)acetate

Reaction time: 24 h; Yield: 61 mg, 80%; white solid; mp 167 °C;  $R_f = 0.2$  (petroleum ether/ethyl acetate = 3:1);  **$^1\text{H}$  NMR (300 MHz,  $\text{CDCl}_3$ ):**  $\delta$  7.90-7.87 (m, 2H), 7.83 (d,  $J = 7.7$  Hz, 1H), 7.77-7.53 (m, 4H), 7.48 (d,  $J = 7.8$  Hz, 1H), 5.96 (t,  $J = 2.3$  Hz, 1H), 4.12 (q,  $J = 7.1$  Hz, 1H), 4.00 (dd,  $J = 17.0, 2.3$  Hz, 1H), 3.81 (dd,  $J = 17.0, 2.3$  Hz, 1H), 1.24 (t,  $J = 7.1$  Hz, 3H).  **$^{13}\text{C}$  NMR (75 MHz,  $\text{CDCl}_3$ ):**  $\delta$  165.9, 154.80, 141.6, 140.8, 136.3, 134.6, 132.3, 130.6, 130.1, 129.9, 128.86, 124.7, 122.4, 118.1, 113.3, 105.3, 75.5, 60.3, 43.3, 14.2. **IR (KBr):** 2231, 1713, 1671, 1353, 1333, 1183, 1112, 761, 729. **HRMS (EI)** calcd for  $\text{C}_{20}\text{H}_{16}\text{N}_2\text{O}_4\text{S}$   $[\text{M}]^+$  380.0831, found 380.0836.

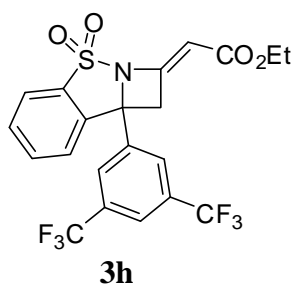

### (*E*)-ethyl 2-(8b-(3,5-bis(trifluoromethyl)phenyl)-4,4-dioxido-1H-azeto

### [1,2-b]benzo[d]isothiazol-2(8bH)-ylidene)acetate

Reaction time: 24 h; Yield: 93 mg, 95%; white solid; mp 136 °C;  $R_f = 0.33$  (petroleum ether/ethyl acetate = 3:1);  **$^1\text{H}$  NMR (300 MHz,  $\text{CDCl}_3$ ):**  $\delta$  8.11 (s, 2H), 7.91-7.83 (m, 2H), 7.75 (t,  $J = 7.3$  Hz, 1H), 7.66 (t,  $J = 7.5$  Hz, 1H), 7.51 (d,  $J = 7.6$  Hz, 1H), 5.99 (s, 1H), 4.13 (q,  $J = 7.1$  Hz, 2H), 3.95 (dd,  $J = 45.2, 17.0$  Hz, 1H), 1.25 (t,  $J = 7.1$  Hz, 3H).  **$^{13}\text{C}$  NMR (75 MHz,  $\text{CDCl}_3$ ):**  $\delta$  165.8, 154.4, 142.0, 141.1, 136.5, 134.8, 134.0, 132.7 (q,  $J_{\text{C-F}} = 37.5$  Hz), 130.9, 125.7, 124.6, 122.9 (q,  $J_{\text{C-F}} = 271.5$  Hz),



122.6, 105.5, 75.2, 60.4, 43.6, 14.2. **IR (KBr):** 1714, 1674, 1337, 1280, 1183, 1135, 901, 705, 681, 572. **HRMS (EI)** calcd for C<sub>21</sub>H<sub>15</sub>F<sub>6</sub>NO<sub>4</sub>S [M]<sup>+</sup> 491.0626, found 491.0633.

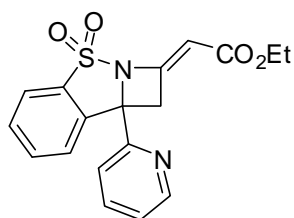

**3i**

**(E)-ethyl 2-(4,4-dioxido-8b-(pyridin-2-yl)-1H-azeto[1,2-b]benzo[d]isothiazol-2(8bH)-ylidene)acetate**

Reaction time: 24 h; Yield: 68 mg, 96%; orange solid; mp 132 °C; R<sub>f</sub> = 0.2 (petroleum ether/ethyl acetate = 3:1); **<sup>1</sup>H NMR (300 MHz, CDCl<sub>3</sub>):** δ 8.66 (d, *J* = 4.8 Hz, 1H), 7.88 (d, *J* = 7.7 Hz, 1H), 7.81-7.52 (m, 5H), 7.37-7.16 (m, 1H), 5.96 (t, *J* = 2.1 Hz, 1H), 4.22-4.00 (m, 3H), 3.75 (dd, *J* = 17.5, 2.2 Hz, 1H), 1.23 (t, *J* = 7.1 Hz, 3H). **<sup>13</sup>C NMR (75 MHz, CDCl<sub>3</sub>):** δ 165.9, 157.7, 156.2, 149.6, 141.6, 137.3, 136.2, 134.2, 130.3, 125.9, 123.2, 121.8, 120.2, 105.0, 76.0, 60.1, 42.9, 14.3. **IR (KBr):** 1714, 1671, 1448, 1353, 1336, 1182, 1112, 1093, 842, 753, 574, 527. **HRMS (EI)** calcd for C<sub>18</sub>H<sub>16</sub>N<sub>2</sub>O<sub>4</sub>S [M]<sup>+</sup> 356.0831, found 356.0835.

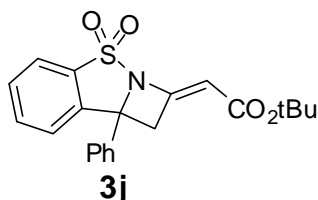

**3j**

**(E)-tert-butyl 2-(4,4-dioxido-8b-phenyl-1H-azeto[1,2-b]benzo[d]isothiazol-2(8bH)-ylidene)acetate**

Reaction time: 1 d; Yield: 73 mg, 94%; white solid; mp 160 °C;  $R_f = 0.5$  (petroleum ether/ethyl acetate = 3:1);  $^1\text{H NMR}$  (300 MHz,  $\text{CDCl}_3$ ):  $\delta$  7.77 (d,  $J = 7.7$  Hz, 1H), 7.69-7.50 (m, 4H), 7.49-7.31 (m, 4H), 5.85 (t,  $J = 2.3$  Hz, 1H), 4.01 (dd,  $J = 17.0, 2.3$  Hz, 1H), 3.73 (dd,  $J = 17.0, 2.3$  Hz, 1H), 1.42 (s, 9H).  $^{13}\text{C NMR}$  (75 MHz,  $\text{CDCl}_3$ ):  $\delta$  165.6, 154.8, 143.2, 139.3, 136.3, 134.3, 130.1, 129.1, 128.7, 125.4, 124.9, 122.2, 106.7, 80.6, 77.0, 43.3, 28.3. **IR (KBr)**: 1700, 1670, 1381, 1270, 728, 573. **HRMS (EI)** calcd for  $\text{C}_{21}\text{H}_{21}\text{NO}_4\text{S}$   $[\text{M}]^+$  383.1191, found 383.1196.

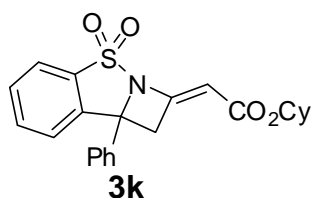

**(E)-cyclohexyl 2-(4,4-dioxido-8b-phenyl-1H-azeto[1,2-b]benzo[d]isothiazol-2(8bH)-ylidene)acetate**

Reaction time: 1 d; Yield: 80 mg, 98%; white solid; mp 130 °C;  $R_f = 0.5$  (petroleum ether/ethyl acetate = 3:1);  $^1\text{H NMR}$  (300 MHz,  $\text{CDCl}_3$ ):  $\delta$  7.78 (d,  $J = 7.8$  Hz, 1H), 7.68-7.51 (m, 4H), 7.49-7.31 (m, 4H), 5.93 (t,  $J = 2.3$  Hz, 1H), 4.76-4.72 (m, 1H), 4.03 (dd,  $J = 17.0, 2.3$  Hz, 1H), 3.75 (dd,  $J = 17.0, 2.3$  Hz, 1H), 1.90-1.62 (m, 4H), 1.52-1.20 (m, 6H).  $^{13}\text{C NMR}$  (75 MHz,  $\text{CDCl}_3$ ):  $\delta$  165.7, 155.6, 143.1, 139.2, 136.3, 134.3, 130.2, 129.1, 128.7, 125.4, 124.9, 122.2, 105.5, 76.9, 72.6, 43.4, 31.8, 31.8, 25.4, 23.8. **IR (KBr)**: 1852, 1687, 1351, 1226, 768, 503. **HRMS (EI)** calcd for  $\text{C}_{23}\text{H}_{23}\text{NO}_4\text{S}$   $[\text{M}]^+$  409.1348, found 409.1352.

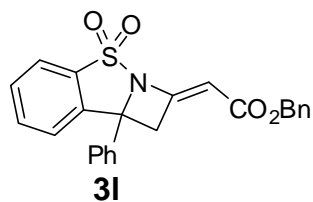

**(E)-benzyl 2-(4,4-dioxido-8b-phenyl-1H-azeto[1,2-b]benzo[d]**

**isothiazol-2(8bH)-ylidene)acetate**

Reaction time: 1 d; Yield: 76 mg, 91%; white solid; mp 146 °C;  $R_f = 0.4$  (petroleum ether/ethyl acetate = 3:1);  $^1\text{H NMR}$  (300 MHz,  $\text{CDCl}_3$ ):  $\delta$  7.74 (d,  $J = 7.8$  Hz, 1H), 7.66-7.47 (m, 4H), 7.46-7.35 (m, 4H), 7.36-7.25 (m, 5H), 6.00 (t,  $J = 2.2$  Hz, 1H), 5.09 (s, 2H), 4.02 (dd,  $J = 17.1, 2.3$  Hz, 1H), 3.74 (dd,  $J = 17.1, 2.3$  Hz, 1H).  $^{13}\text{C NMR}$  (75 MHz,  $\text{CDCl}_3$ ):  $\delta$  166.0, 156.6, 143.0, 139.1, 136.3, 136.0, 134.3, 130.2, 129.1, 128.7, 128.6, 128.3, 125.4, 124.9, 122.3, 104.4, 76.9, 66.0, 43.3. **IR (KBr)**: 1705, 1670, 1344, 1108, 700, 572, 571. **HRMS (EI)** calcd for  $\text{C}_{24}\text{H}_{19}\text{NO}_4\text{S}$   $[\text{M}]^+$  417.1035, found 417.1039.

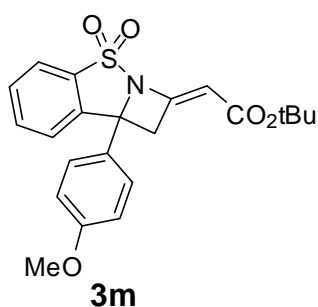

**(E)-tert-butyl 2-(8b-(4-methoxyphenyl)-4,4-dioxido-1H-azeto[1,2-b]benzo**

**[d]isothiazol-2(8bH)-ylidene)acetate**

Reaction time: 5 d; Yield: 51 mg, 61%; white solid; mp 191 °C;  $R_f = 0.4$  (petroleum ether/ethyl acetate = 3:1);  $^1\text{H NMR}$  (300 MHz,  $\text{CDCl}_3$ ):  $\delta$  7.79 (d,  $J = 7.9$

Hz, 1H), 7.72-7.51 (m, 2H), 7.50-7.36 (m, 3H), 7.02-6.81 (m, 2H), 5.84 (t,  $J = 2.3$  Hz, 1H), 4.01 (dd,  $J = 17.0, 2.3$  Hz, 1H), 3.80 (s, 3H), 3.67 (dd,  $J = 17.0, 2.3$  Hz, 1H), 1.43 (s, 9H).  **$^{13}\text{C}$  NMR (75 MHz,  $\text{CDCl}_3$ ):**  $\delta$  165.7, 160.0, 155.0, 143.6, 136.6, 134.3, 131.2, 130.1, 127.2, 125.0, 122.3, 114.4, 106.7, 80.6, 77.0, 55.5, 43.0, 28.4. **IR (KBr):** 1707, 1670, 1343, 1132, 762, 553. **HRMS (EI)** calcd for  $\text{C}_{22}\text{H}_{23}\text{NO}_5\text{S}$   $[\text{M}]^+$  413.1297, found 413.1303.

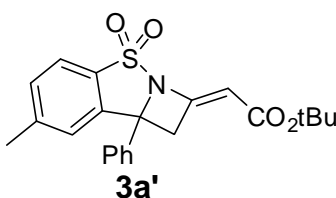

**(E)-tert-butyl 2-(7-methyl-4,4-dioxido-8b-phenyl-1H-azeto[1,2-b]benzo[d]isothiazol-2(8bH)-ylidene)acetate**

Reaction time: 1 d; Yield: 70 mg, 89%; white solid; mp 157 °C;  $R_f = 0.6$  (petroleum ether/ethyl acetate = 3:1);  **$^1\text{H}$  NMR (300 MHz,  $\text{CDCl}_3$ ):**  $\delta$  7.65 (d,  $J = 8.0$  Hz, 1H), 7.61-7.55 (m, 2H), 7.47-7.29 (m, 4H), 7.20 (s, 1H), 5.84 (t,  $J = 2.3$  Hz, 1H), 3.99 (dd,  $J = 17.0, 2.3$  Hz, 1H), 3.72 (dd,  $J = 17.0, 2.3$  Hz, 1H), 2.41 (s, 3H), 1.42 (s, 9H).  **$^{13}\text{C}$  NMR (75 MHz,  $\text{CDCl}_3$ ):**  $\delta$  165.6, 155.1, 145.6, 143.6, 139.5, 133.8, 131.1, 129.0, 128.6, 125.4, 125.0, 121.9, 106.6, 80.5, 76.8, 43.2, 28.3, 21.9. **IR (KBr):** 1707, 1670, 1343, 1132, 762, 553. **HRMS (EI)** calcd for  $\text{C}_{22}\text{H}_{23}\text{NO}_4\text{S}$   $[\text{M}]^+$  397.1348, found 397.1353.

### 3. PPh<sub>3</sub>-catalyzed [3 + 2] cycloaddition (Table 3).

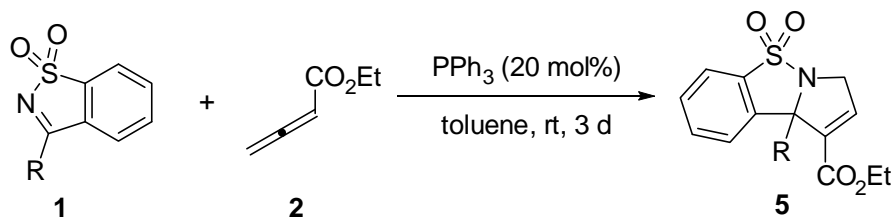

To a stirred solution of cyclic ketimines (0.2 mmol) and PPh<sub>3</sub> (10.5 mg, 0.04 mmol) in toluene (2 mL) was added ethyl 2,3-butadienoate (48.8 mg, 0.4 mmol). The reaction mixture was stirred for 3 d at room temperature until the full consumption of the cyclic ketimines. The reaction mixture was concentrated under reduced pressure, and the residue was purified by column chromatography on silica gel (petroleum ether/EtOAc as the eluent, typically 10:1-5:1) to furnish the corresponding [3+2] cycloadduct **5**.

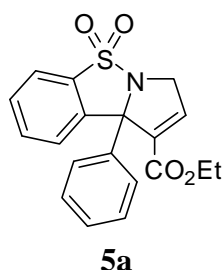

#### ethyl 9b-phenyl-3,9b-dihydrobenzo[d]pyrrolo[1,2-b]isothiazole-1-carboxylate

##### 5,5-dioxide

Reaction time: 3 d; Yield: 75 mg, 75%; white solid; mp 156 °C; R<sub>f</sub> = 0.4 (petroleum ether/ethyl acetate = 3:1); <sup>1</sup>H NMR (300 MHz, CDCl<sub>3</sub>): δ 8.00 (dd, *J* = 6.9, 1.6 Hz, 1H), 7.86-7.80 (m, 1H), 7.61 (m, 2H), 7.30 (dt, *J* = 4.5, 2.4 Hz, 3H), 7.25-7.18 (m, 2H), 7.10 (t, *J* = 2.2 Hz, 1H), 4.79 (dd, *J* = 18.4, 2.5 Hz, 1H), 4.26 (dd, *J* = 15.8, 2.6 Hz, 1H), 4.21 (q, *J* = 7.1 Hz, 2H), 1.26 (t, *J* = 7.1 Hz, 3H). <sup>13</sup>C NMR (75

**MHz, CDCl<sub>3</sub>**):  $\delta$  162.2, 141.0, 140.8, 140.1, 136.0, 135.8, 133.1, 130.0, 128.6, 128.4, 127.9, 126.8, 121.4, 82.8, 61.3, 52.6, 14.1. **IR (KBr)**: 1717, 1315, 1175, 1315, 1175, 1112, 762, 697, 572. **HRMS (EI)** calcd for C<sub>19</sub>H<sub>17</sub>NO<sub>4</sub>S [M]<sup>+</sup> 355.0878, found 355.0883.

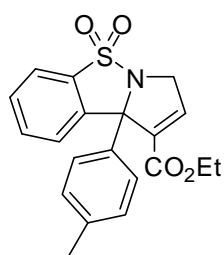

**5b**

**ethyl 9b-(p-tolyl)-3,9b-dihydrobenzo[d]pyrrolo[1,2-b]isothiazole-1-carboxylate 5,5-dioxide**

Reaction time: 3 d; Yield: 40 mg, 54%; white solid; mp 128 °C; R<sub>f</sub> = 0.2 (petroleum ether/ethyl acetate = 5:1); **<sup>1</sup>H NMR (300 MHz, CDCl<sub>3</sub>)**:  $\delta$  8.01-7.98 (m, 1H), 7.82 (dd, *J* = 6.8, 1.9 Hz, 1H), 7.68-7.53 (m, 2H), 7.14-7.05 (m, 5H), 4.78 (dd, *J* = 18.4, 2.5 Hz, 1H), 4.33-4.09 (m, 3H), 2.31 (s, 3H), 1.27 (t, *J* = 7.1 Hz, 3H). **<sup>13</sup>C NMR (75 MHz, CDCl<sub>3</sub>)**:  $\delta$  162.2, 140.8, 140.3, 138.3, 138.0, 136.0, 135.8, 133.0, 129.9, 129.3, 127.9, 126.7, 121.3, 82.7, 61.2, 52.5, 21.1, 14.1. **IR (KBr)**: 1716, 1511, 1317, 1175, 1108, 923, 755, 571, 523. **HRMS (EI)** C<sub>20</sub>H<sub>19</sub>NO<sub>4</sub>S [M]<sup>+</sup> 369.1035, found 369.1039.

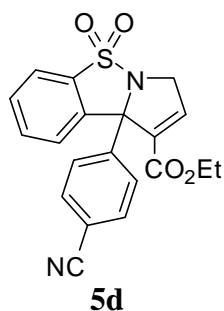

**ethyl 9b-(4-cyanophenyl)-3,9b-dihydrobenzo[d]pyrrolo[1,2-b] isothiazole-1-carboxylate 5,5-dioxide**

Reaction time: 3 d; Yield: 56 mg, 74%; white solid; mp 132 °C;  $R_f = 0.2$  (petroleum ether/ethyl acetate = 5:1);  $^1\text{H NMR}$  (300 MHz,  $\text{CDCl}_3$ ):  $\delta$  8.00-7.97 (m, 1H), 7.86-7.83 (m, 1H), 7.70-7.59 (m, 4H), 7.39 (d,  $J = 8.5$  Hz, 2H), 7.12 (t,  $J = 2.0$  Hz, 1H), 4.81 (dd,  $J = 18.5, 2.3$  Hz, 1H), 4.35 (dd,  $J = 18.5, 1.8$  Hz, 1H), 4.22 (q,  $J = 7.1$  Hz, 2H), 1.27 (t,  $J = 7.1$  Hz, 3H).  $^{13}\text{C NMR}$  (75 MHz,  $\text{CDCl}_3$ ):  $\delta$  162.0, 146.0, 141.1, 139.1, 136.1, 135.1, 133.5, 132.3, 130.5, 127.8, 127.5, 121.7, 118.4, 112.3, 81.8, 61.6, 53.7, 14.1. **IR (KBr)**: 2229, 1720, 1450, 1243, 1177, 1112, 926, 765, 574. **HRMS (EI)** calcd for  $\text{C}_{20}\text{H}_{16}\text{N}_2\text{O}_4\text{S}$   $[\text{M}]^+$  380.0831, found 380.0835.

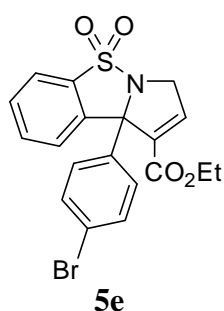

**ethyl 9b-(4-bromophenyl)-3,9b-dihydrobenzo[d]pyrrolo[1,2-b]isothiazole-1-carboxylate 5,5-dioxide**

Reaction time: 3 d; Yield: 65 mg, 75%; white solid; mp 93 °C;  $R_f = 0.4$  (petroleum ether/ethyl acetate = 3:1);  $^1\text{H NMR}$  (300 MHz,  $\text{CDCl}_3$ ):  $\delta$  8.00-7.97 (m,

1H), 7.83-7.78 (m, 1H), 7.62 (pd,  $J = 7.3, 1.2$  Hz, 2H), 7.44-7.36 (m, 2H), 7.13-7.08 (m, 3H), 4.77 (dd,  $J = 18.4, 2.4$  Hz, 1H), 4.28 (dd,  $J = 18.4, 1.9$  Hz, 1H), 4.21 (q,  $J = 7.2$  Hz, 2H), 1.27 (t,  $J = 7.1$  Hz, 3H).  **$^{13}\text{C}$  NMR (75 MHz,  $\text{CDCl}_3$ ):**  $\delta$  162.0, 140.9, 140.0, 139.7, 136.0, 135.4, 133.3, 131.6, 130.2, 128.6, 127.6, 122.7, 121.5, 82.1, 61.4, 53.1, 14.1. **IR (KBr):** 1717, 1325, 1175, 1114, 923, 758, 572. **HRMS (EI)** calcd for  $\text{C}_{19}\text{H}_{16}\text{BrNO}_4\text{S} [\text{M}]^+$  432.9983, 432.9963, found 432.9987, 432.9969.

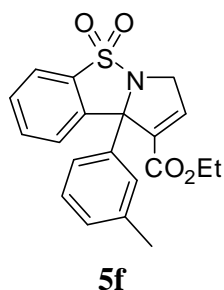

**ethyl 9b-(m-tolyl)-3,9b-dihydrobenzo[d]pyrrolo[1,2-b]isothiazole-1-carboxylate  
5,5-dioxide**

Reaction time: 3 d; Yield: 49 mg, 66%; white solid; mp 180 °C;  $R_f = 0.3$  (petroleum ether/ethyl acetate = 3:1);  **$^1\text{H}$  NMR (300 MHz,  $\text{CDCl}_3$ ):**  $\delta$  8.00–7.95 (m, 1H), 7.87–7.79 (m, 1H), 7.61 (pd,  $J = 7.3, 1.4$  Hz, 2H), 7.24–7.15 (m, 1H), 7.10 (dd,  $J = 4.3, 2.0$  Hz, 2H), 7.04–6.93 (m, 2H), 4.78 (dd,  $J = 18.4, 2.5$  Hz, 1H), 4.32–4.23 (m, 1H), 4.23–4.12 (m, 2H), 2.29 (s, 3H), 1.26 (t,  $J = 7.1$  Hz, 3H).  **$^{13}\text{C}$  NMR (75 MHz,  $\text{CDCl}_3$ ):**  $\delta$  162.2, 140.9, 140.7, 140.1, 138.2, 135.9, 133.0, 129.9, 129.3, 128.4, 128.0, 127.4, 123.9, 121.3, 82.8, 61.2, 52.5, 21.6, 14.1. **IR (KBr):** 1716, 1522, 1316, 1176, 1111, 925, 760, 572. **HRMS (EI)** calcd for  $\text{C}_{20}\text{H}_{19}\text{NO}_4\text{S} [\text{M}]^+$  369.1035, found 369.1040.



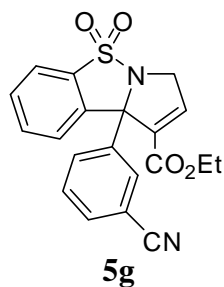

**ethyl 9b-(3-cyanophenyl)-3,9b-dihydrobenzo[d]pyrrolo[1,2-b] isothiazole  
-1-carboxylate 5,5-dioxide**

Reaction time: 3 d; Yield: 59 mg, 77%; white solid; mp 137 °C;  $R_f = 0.3$  (petroleum ether/ethyl acetate = 3:1);  $^1\text{H NMR}$  (300 MHz,  $\text{CDCl}_3$ ):  $\delta$  8.00-7.97 (m, 1H), 7.90-7.81 (m, 1H), 7.76-7.55 (m, 4H), 7.53-7.38 (m, 2H), 7.12 (t,  $J = 2.0$  Hz, 1H), 4.80 (dd,  $J = 18.5, 2.3$  Hz, 1H), 4.36 (dd,  $J = 18.5, 1.8$  Hz, 1H), 4.22 (q,  $J = 7.1$  Hz, 2H), 1.28 (t,  $J = 7.1$  Hz, 3H).  $^{13}\text{C NMR}$  (75 MHz,  $\text{CDCl}_3$ ):  $\delta$  161.9, 142.6, 141.1, 139.1, 136.2, 135.1, 133.6, 132.0, 131.4, 130.7, 130.5, 129.4, 127.4, 121.8, 118.6, 112.7, 81.56, 61.6, 53.7, 14.1. **IR (KBr)**: 2230, 1716, 1330, 1176, 1025, 797, 644, 570. **HRMS (EI)**  $\text{C}_{20}\text{H}_{16}\text{N}_2\text{O}_4\text{S}$   $[\text{M}]^+$  380.0831, found 380.0835.

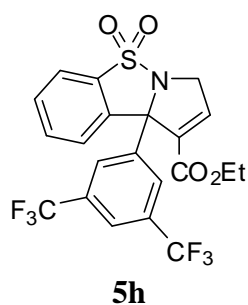

**ethyl 9b-(3,5-bis(trifluoromethyl)phenyl)-3,9b-dihydrobenzo[d]pyrrolo  
[1,2-b]isothiazole-1-carboxylate 5,5-dioxide**

Reaction time: 3 d; Yield: 61 mg, 62%; white solid; mp 126 °C;  $R_f = 0.5$  (petroleum ether/ethyl acetate = 3:1);  $^1\text{H NMR}$  (300 MHz,  $\text{CDCl}_3$ ):  $\delta$  8.03 (d,  $J = 7.5$  Hz, 1H), 7.85 (dd,  $J = 8.0, 7.3$  Hz, 2H), 7.77 (s, 2H), 7.75-7.62 (m, 2H), 7.14 (s, 1H),

4.82 (dd,  $J = 18.5, 2.2$  Hz, 1H), 4.43 (dd,  $J = 18.5, 1.5$  Hz, 1H), 4.22 (q,  $J = 7.1$  Hz, 2H), 1.26 (t,  $J = 7.1$  Hz, 3H).  $^{13}\text{C}$  NMR (75 MHz,  $\text{CDCl}_3$ ):  $\delta$  161.9, 143.7, 141.3, 138.8, 136.2, 135.1, 133.7, 131.8 (q,  $J_{\text{C-F}} = 33.1$  Hz), 130.7, 127.3, 127.2, 124.9 (q,  $J_{\text{C-F}} = 270$  Hz), 122.0, 121.3, 81.3, 61.7, 54.0, 14.0. IR (KBr): 1720, 1372, 1279, 1175, 1134, 841, 763, 569. HRMS (EI) calcd for  $\text{C}_{21}\text{H}_{15}\text{F}_6\text{NO}_4\text{S}$   $[\text{M}]^+$  491.0626, found 491.0632.

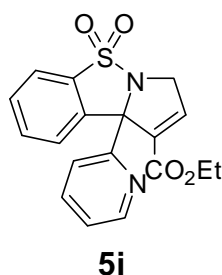

**ethyl 9b-(pyridin-2-yl)-3,9b-dihydrobenzo[d]pyrrolo[1,2-b]isothiazole-1-carboxylate 5,5-dioxide**

Reaction time: 3 d; Yield: 56 mg, 79%; yellow solid; mp 195 °C;  $R_f = 0.2$  (petroleum ether/ethyl acetate = 3:1);  $^1\text{H}$  NMR (300 MHz,  $\text{CDCl}_3$ ):  $\delta$  8.56 (d,  $J = 4.1$  Hz, 1H), 8.05 (dd,  $J = 6.5, 2.1$  Hz, 1H), 7.84 (dd,  $J = 6.3, 2.4$  Hz, 1H), 7.69-7.53 (m, 3H), 7.25-7.16 (m, 1H), 7.09-7.01 (m, 2H), 4.84 (dd,  $J = 18.1, 2.4$  Hz, 1H), 4.32 (dd,  $J = 18.0, 1.8$  Hz, 1H), 4.22 (q,  $J = 7.1$  Hz, 2H), 1.27 (t,  $J = 7.1$  Hz, 3H).  $^{13}\text{C}$  NMR (75 MHz,  $\text{CDCl}_3$ ):  $\delta$  162.3, 159.5, 149.0, 139.5, 139.5, 137.1, 135.9, 135.7, 133.2, 130.1, 128.0, 123.2, 121.3, 121.2, 83.8, 61.1, 53.5, 14.1. IR (KBr): 1714, 1671, 1448, 1353, 1336, 1182, 1112, 1093, 842, 753, 574, 527. HRMS (EI) calcd for  $\text{C}_{18}\text{H}_{16}\text{N}_2\text{O}_4\text{S}$   $[\text{M}]^+$  355.0753, found 355.0757.

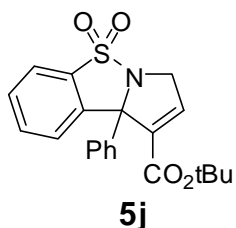

**tert-butyl 9b-phenyl-3,9b-dihydrobenzo[d]pyrrolo[1,2-b]isothiazole-1-carboxylate 5,5-dioxide**

Reaction time: 2 d; Yield: 56 mg, 73%; yellow solid; mp 158 °C;  $R_f = 0.6$  (petroleum ether/ethyl acetate = 3:1);  $^1\text{H NMR}$  (300 MHz,  $\text{CDCl}_3$ ):  $\delta$  7.98 (d,  $J = 7.7$  Hz, 1H), 7.82 (d,  $J = 7.2$  Hz, 1H), 7.60 (dq,  $J = 14.3, 7.1$  Hz, 2H), 7.44-7.25 (m, 3H), 7.22-7.12 (m, 2H), 6.98 (s, 1H), 4.73 (dd,  $J = 18.2, 2.3$  Hz, 1H), 4.24 (dd,  $J = 18.2, 1.4$  Hz, 1H), 1.42 (s, 9H).  $^{13}\text{C NMR}$  (75 MHz,  $\text{CDCl}_3$ ):  $\delta$  161.5, 141.2, 140.5, 140.0, 137.1, 136.2, 133.1, 130.0, 128.5, 128.3, 127.7, 126.8, 121.4, 82.7, 82.4, 52.9, 28.1. **IR (KBr):** 1712, 1310, 1175, 764, 611. **HRMS (EI)** calcd for  $\text{C}_{21}\text{H}_{21}\text{NO}_4\text{S}$   $[\text{M}]^+$  383.1191, found 383.1195.

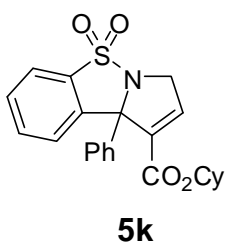

**cyclohexyl 9b-phenyl-3,9b-dihydrobenzo[d]pyrrolo[1,2-b]isothiazole-1-carboxylate 5,5-dioxide**

Reaction time: 2 d; Yield: 59 mg, 72%; yellow solid; mp 140 °C;  $R_f = 0.5$  (petroleum ether/ethyl acetate = 3:1);  $^1\text{H NMR}$  (300 MHz,  $\text{CDCl}_3$ ):  $\delta$  8.00 (dd,  $J = 6.9, 1.4$  Hz, 1H), 7.83 (dd,  $J = 6.8, 1.9$  Hz, 1H), 7.65-7.55 (m, 2H), 7.38-7.27 (m, 3H),

7.22-7.19 (m, 2H), 7.09 (t,  $J = 2.1$  Hz, 1H), 4.97-4.66 (m, 2H), 4.27 (dd,  $J = 18.3, 1.8$  Hz, 1H), 1.95-1.62 (m, 4H), 1.58-1.11 (m, 6H).  $^{13}\text{C}$  NMR (75 MHz,  $\text{CDCl}_3$ ):  $\delta$  161.7, 141.1, 140.8, 140.3, 136.3, 136.1, 133.1, 130.0, 128.6, 128.5, 127.9, 126.9, 121.5, 82.8, 74.0, 52.8, 31.6, 31.5, 25.3, 23.8, 23.7. IR (KBr): 1713, 1318, 1240, 1176, 761, 611. HRMS (EI) calcd for  $\text{C}_{23}\text{H}_{23}\text{NO}_4\text{S}$   $[\text{M}]^+$  409.1348, found 409.1354.

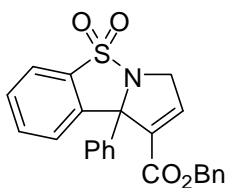

**5I**

**benzyl 9b-phenyl-3,9b-dihydrobenzo[d]pyrrolo[1,2-b]isothiazole-1-carboxylate 5,5-dioxide**

Reaction time: 2 d; Yield: 63 mg, 76%; yellow solid; mp 143 °C;  $R_f = 0.7$  (petroleum ether/ethyl acetate = 3:1);  $^1\text{H}$  NMR (300 MHz,  $\text{CDCl}_3$ ):  $\delta$  7.93 (dd,  $J = 6.1, 2.8$  Hz, 1H), 7.84-7.76 (m, 1H), 7.56 (dd,  $J = 5.8, 3.2$  Hz, 2H), 7.39-7.17 (m, 10H), 7.13 (t,  $J = 2.1$  Hz, 1H), 5.17 (s, 2H), 4.77 (dd,  $J = 18.5, 2.5$  Hz, 1H), 4.24 (dd,  $J = 18.5, 1.8$  Hz, 1H).  $^{13}\text{C}$  NMR (75 MHz,  $\text{CDCl}_3$ ):  $\delta$  162.0, 141.7, 140.8, 140.0, 136.1, 135.6, 135.2, 133.2, 130.1, 128.7, 128.7, 128.6, 128.5, 128.3, 127.9, 126.9, 121.4, 82.8, 67.0, 52.8. IR (KBr): 1716, 1315, 1175, 752, 697. HRMS (EI) calcd for  $\text{C}_{24}\text{H}_{19}\text{NO}_4\text{S}$   $[\text{M}]^+$  417.1035, found 417.1040.

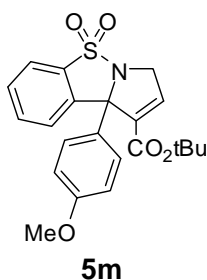

**tert-butyl 9b-(4-methoxyphenyl)-3,9b-dihydrobenzo[d]pyrrolo[1,2-b]**

**isothiazole-1-carboxylate 5,5-dioxide**

Reaction time: 5 d; Yield: 56 mg, 67%; yellow solid; mp 155 °C;  $R_f = 0.5$  (petroleum ether/ethyl acetate = 3:1);  $^1\text{H NMR}$  (300 MHz,  $\text{CDCl}_3$ ):  $\delta$  8.05-7.93 (m, 1H), 7.89-7.80 (m, 1H), 7.71-7.52 (m, 2H), 7.19-7.06 (m, 2H), 6.96 (t,  $J = 2.1$  Hz, 1H), 6.89-6.71 (m, 2H), 4.72 (dd,  $J = 18.1, 2.4$  Hz, 1H), 4.24 (dd,  $J = 18.2, 1.8$  Hz, 1H), 3.77 (s, 3H), 1.44 (s, 9H).  $^{13}\text{C NMR}$  (75 MHz,  $\text{CDCl}_3$ ):  $\delta$  161.6, 159.6, 140.9, 139.9, 137.2, 136.3, 133.5, 133.1, 129.9, 128.2, 127.8, 121.5, 113.9, 82.6, 82.4, 55.4, 52.7, 28.2. **IR (KBr)**: 1713, 1253, 1174, 756, 612. **HRMS (EI)** calcd for  $\text{C}_{22}\text{H}_{23}\text{NO}_5\text{S}$   $[\text{M}]^+$  413.1297, found 413.1302.

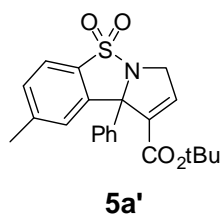

**tert-butyl 8-methyl-9b-phenyl-3,9b-dihydrobenzo[d]pyrrolo[1,2-b]**

**isothiazole-1-carboxylate 5,5-dioxide**

Reaction time: 2 d; Yield: 63 mg, 80%; white solid; mp 163 °C;  $R_f = 0.6$  (petroleum ether/ethyl acetate = 3:1);  $^1\text{H NMR}$  (300 MHz,  $\text{CDCl}_3$ ):  $\delta$  7.76 (s, 1H), 7.70 (d,  $J = 8.0$  Hz, 1H), 7.38 (d,  $J = 8.0$  Hz, 1H), 7.34-7.24 (m, 3H), 7.22-7.13 (m,

2H), 6.98 (t,  $J = 1.9$  Hz, 1H), 4.72 (dd,  $J = 18.2, 2.4$  Hz, 1H), 4.23 (dd,  $J = 18.2, 1.7$  Hz, 1H), 2.43 (s, 3H), 1.42 (s, 9H).  $^{13}\text{C}$  NMR (75 MHz,  $\text{CDCl}_3$ ):  $\delta$  161.6, 144.1, 141.4, 140.9, 140.0, 137.2, 133.7, 130.9, 128.5, 128.3, 127.8, 126.9, 121.2, 82.6, 82.3, 52.9, 28.1, 22.0. IR (KBr): 1709, 1308, 1105, 834, 604. HRMS (EI) calcd for  $\text{C}_{22}\text{H}_{23}\text{NO}_4\text{S}$   $[\text{M}]^+$  397.1348, found 397.1353.

#### 4. $\text{PBu}_3$ -catalyzed [3 + 2] cycloaddition (Scheme 1).

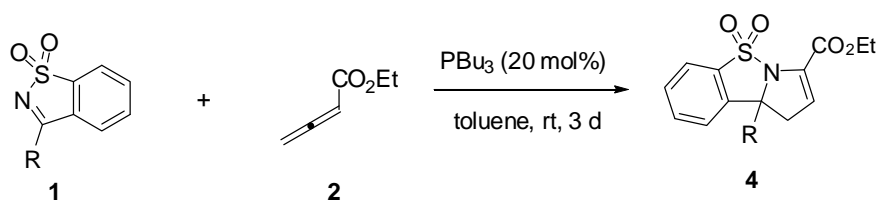

To a stirred solution of cyclic ketimines (0.2 mmol) and  $\text{PBu}_3$  (8.1 mg, 0.04 mmol) in toluene (2 mL) was added ethyl 2,3-butadienoate (48.8 mg, 0.4 mmol). The reaction mixture was stirred for 3 d at room temperature until the full consumption of the cyclic ketimines. The reaction mixture was concentrated under reduced pressure, and the residue was purified by column chromatography on silica gel (petroleum ether/EtOAc, typically 20:1-5:1) to furnish the corresponding [3+2] cycloadduct **4**.

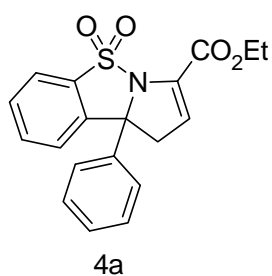

**ethyl 9b-phenyl-1,9b-dihydrobenzo[d]pyrrolo[1,2-b]isothiazole-3-carboxylate**

**5,5-dioxide**

Reaction time: 3 d; **3a:4a:5a** = 9:82:9. Yield of pure **4a**: 37 mg, 52%; white solid; mp 165 °C;  $R_f$  = 0.3 (petroleum ether/ethyl acetate = 3:1);  **$^1\text{H NMR}$  (300 MHz,  $\text{CDCl}_3$ )**:  $\delta$  7.74 (d,  $J$  = 7.8 Hz, 1H), 7.69 (dd,  $J$  = 5.5, 3.6 Hz, 2H), 7.61 (td,  $J$  = 7.6, 1.2 Hz, 1H), 7.54-7.43 (m, 2H), 7.42-7.35 (m, 2H), 7.34-7.27 (m, 1H), 6.34 (dd,  $J$  = 3.2, 2.7 Hz, 1H), 4.47-4.27 (m, 2H), 3.56 (ddd,  $J$  = 20.9, 18.3, 3.0 Hz, 2H), 1.39 (t,  $J$  = 7.1 Hz, 3H).  **$^{13}\text{C NMR}$  (75 MHz,  $\text{CDCl}_3$ )**:  $\delta$  160.7, 143.4, 142.4, 136.2, 134.5, 134.0, 129.9, 129.0, 128.4, 125.5, 124.4, 124.2, 122.5, 79.1, 61.8, 46.0, 14.1. **IR (KBr)**: 1729, 1330, 1178, 739, 571. **HRMS (EI)** calcd for  $\text{C}_{19}\text{H}_{17}\text{NO}_4\text{S}$   $[\text{M}]^+$  355.0878, found 355.0882.

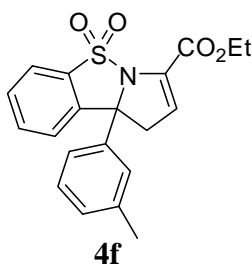

**ethyl 9b-(m-tolyl)-1,9b-dihydrobenzo[d]pyrrolo[1,2-b]isothiazole-3-carboxylate**

**5,5-dioxide**

Reaction time: 3 d; **3f:4f:5f** = 3:88:9. Yield of **4f**: 43 mg, 58%; white solid; mp 148 °C;  $R_f$  = 0.3 (petroleum ether/ethyl acetate = 10:1);  **$^1\text{H NMR}$  (300 MHz,  $\text{CDCl}_3$ )**:  $\delta$  7.73 (d,  $J$  = 7.8 Hz, 1H), 7.60 (dd,  $J$  = 11.0, 4.0 Hz, 1H), 7.55-7.41 (m, 4H), 7.26 (t,  $J$  = 7.6 Hz, 1H), 7.11 (d,  $J$  = 7.5 Hz, 1H), 6.34 (t,  $J$  = 2.8 Hz, 1H), 4.51-4.25 (m, 2H), 3.54 (ddd,  $J$  = 20.8, 18.4, 2.9 Hz, 2H), 2.35 (s, 3H), 1.38 (t,  $J$  = 7.1 Hz, 3H).  **$^{13}\text{C NMR}$  (75 MHz,  $\text{CDCl}_3$ )**:  $\delta$  160.7, 143.3, 142.4, 138.8, 136.1, 134.4, 134.0, 129.8,

129.2, 128.9, 126.1, 124.4, 124.4, 122.5, 122.4, 79.1, 61.7, 46.0, 21.7, 14.1. **IR (KBr):**  
1729, 1634, 1605, 1449, 1371, 1179, 1137, 759, 652, 569. **HRMS (EI)** calcd for  
 $C_{20}H_{19}NO_4S$   $[M]^+$  369.1035, found 369.1039.

## 5. Chiral catalysts for the reactions (Table S1).

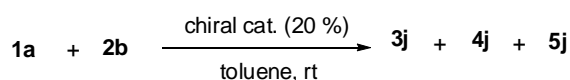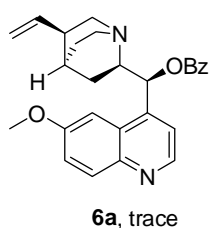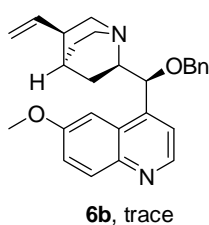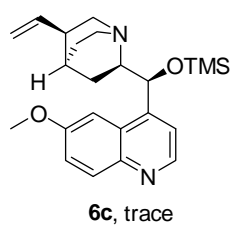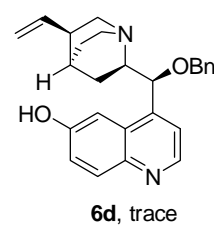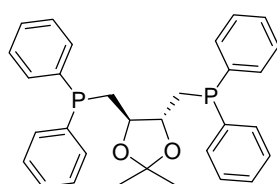

**7a (+)-DIOP**

**5j**, 68% yield<sup>a</sup>, 0% ee<sup>b</sup>  
(**3j**:**4j**:**5j** = 0:9:91)<sup>c</sup>

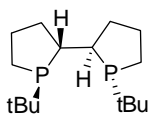

**7b (+)-Tangphos**

**5j**, 45% yield<sup>a</sup>, 0% ee<sup>b</sup>  
(**3j**:**4j**:**5j** = 0:37:63)<sup>c</sup>

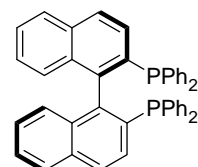

**7c (R)-BINAP**

**5j**, 14% yield<sup>a</sup>, 0% ee<sup>b</sup>  
(**3j**:**4j**:**5j** = 0:0:100)<sup>c</sup>

<sup>a</sup> Isolated yield of pure **5j**.

<sup>b</sup> Determined by chiral HPLC for **5j**.

<sup>c</sup> Determined by the <sup>1</sup>H NMR (300 MHz) of the reaction mixture.

## 6. Control experiments for expansion of cycloadduct **3j** to **4j/5j**

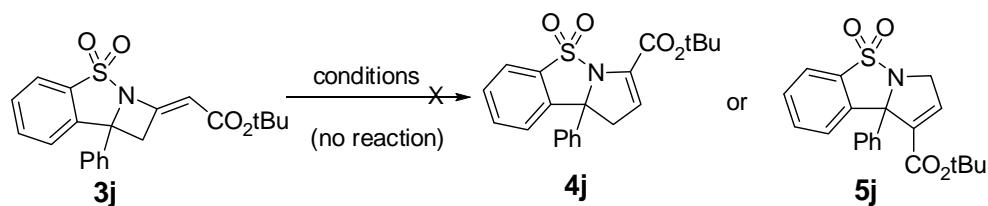

conditions A: toluene, rt, 3d, no reaction detected

conditions B: **DABCO** (20 mol%), toluene, rt, 3d, no reaction detected

conditions C: **PPh<sub>3</sub>** (20 mol%), toluene, rt, 3d, no reaction detected



## 7. X-Ray structures of cycloadduct **3a** and **5a** (Fig. S1 and S2)

The crystal suitable for X-ray analysis was prepared by slow evaporation of the solvent of the solution of **3a** and **5a** in chloroform at room temperature (Figure S1 and S2).

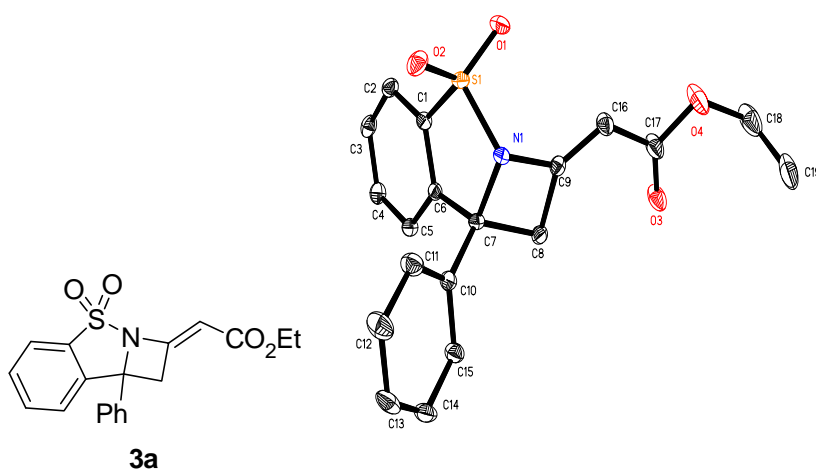

**Fig. S1** X-ray structures of cycloaddition products **3a**

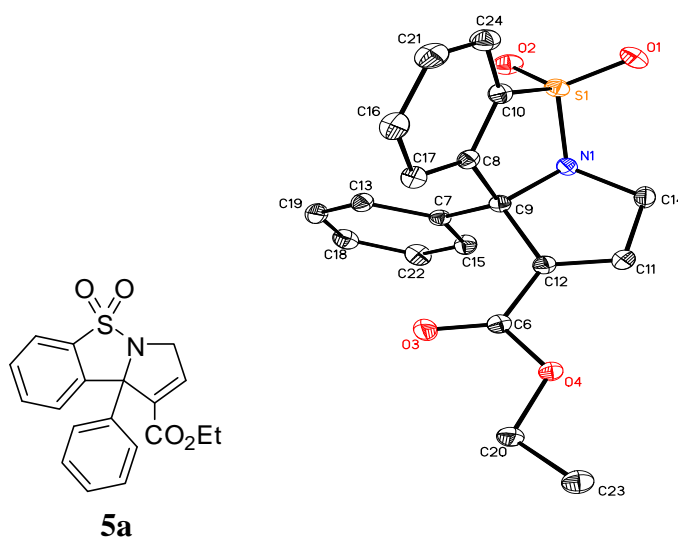

**Fig. S2** X-ray structures of cycloaddition products **5a**.

## 8. References

1. F. A. Davis, J. C. Towson, D. B. Vashi, R. ThimmaReddy, J. P. McCauley, M. E. Harakal and D. J. Gosciniak, *J. Org. Chem.*, 1990, **55**, 1254;
2. (a) Y.-L. Shi and M. Shi, *Org. Lett.*, 2005, **7**, 3057; (b) G. S. Creech and O. Kwon, *Org. Lett.*, 2008, **10**, 429;

## Part III NMR Spectra

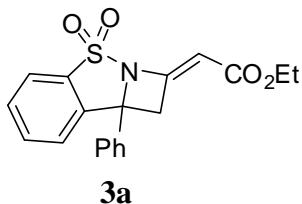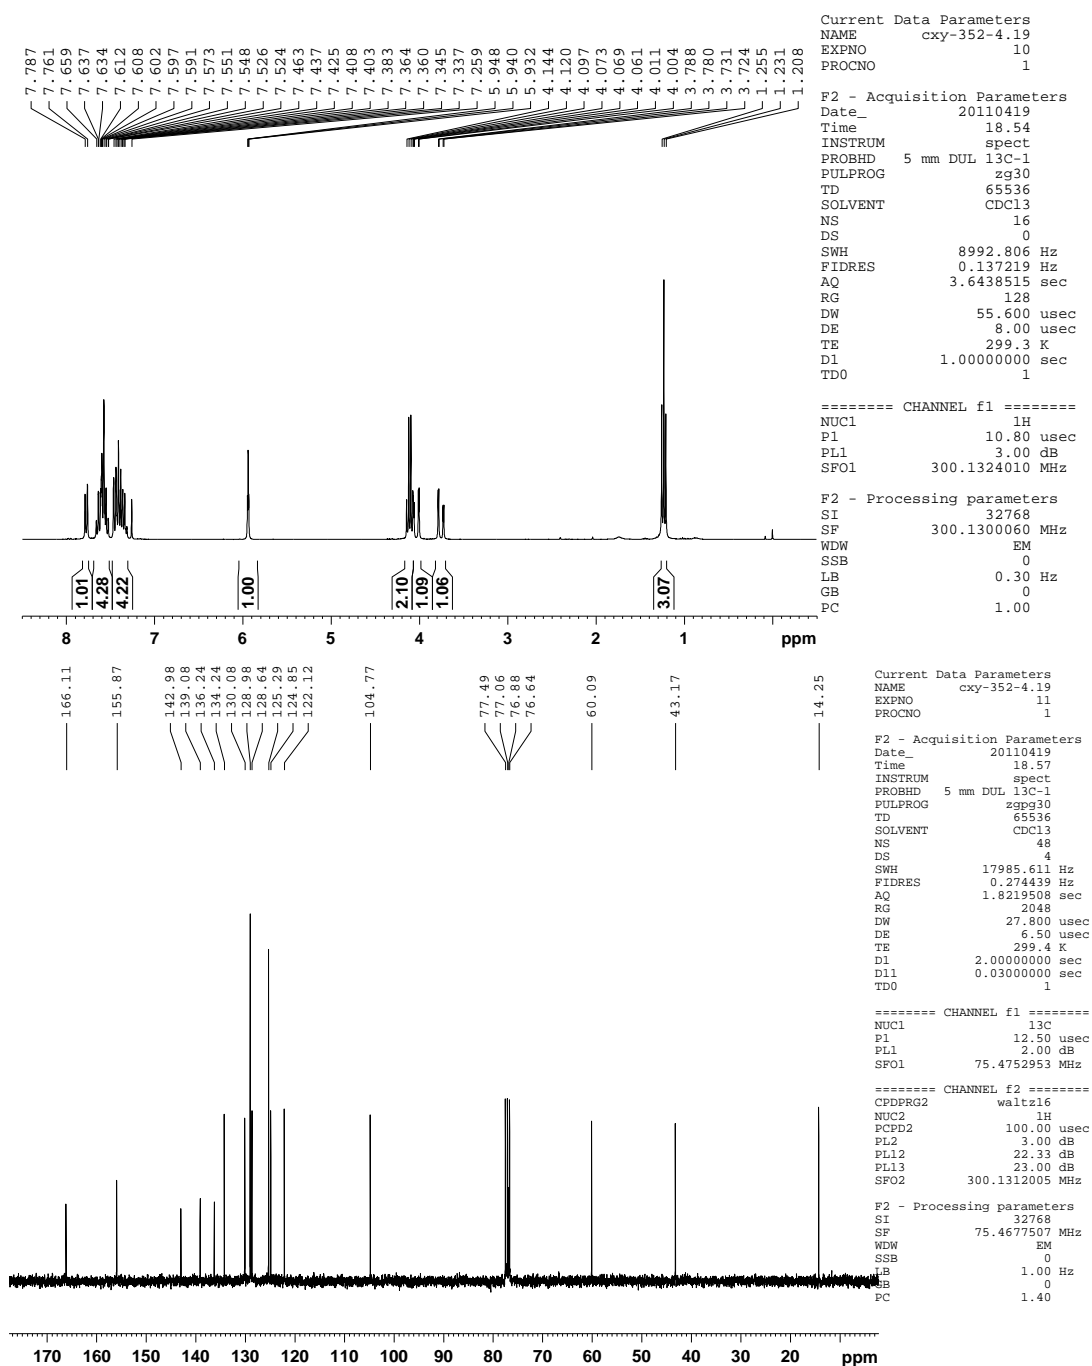

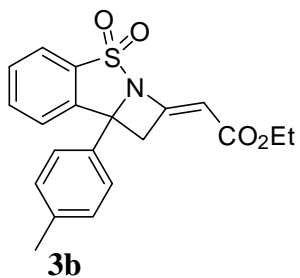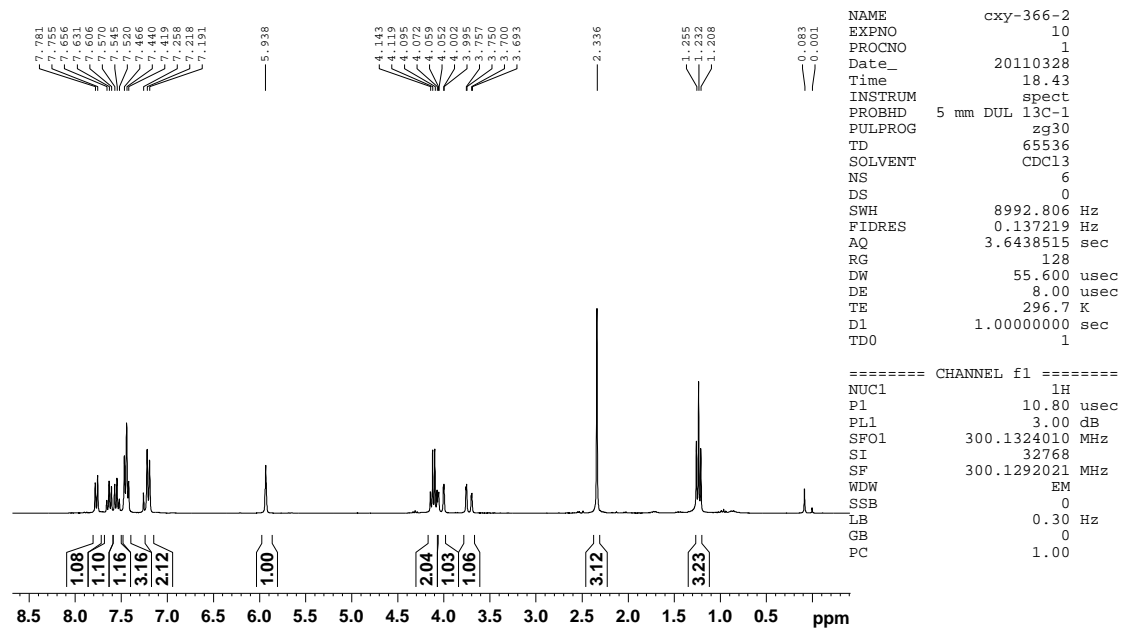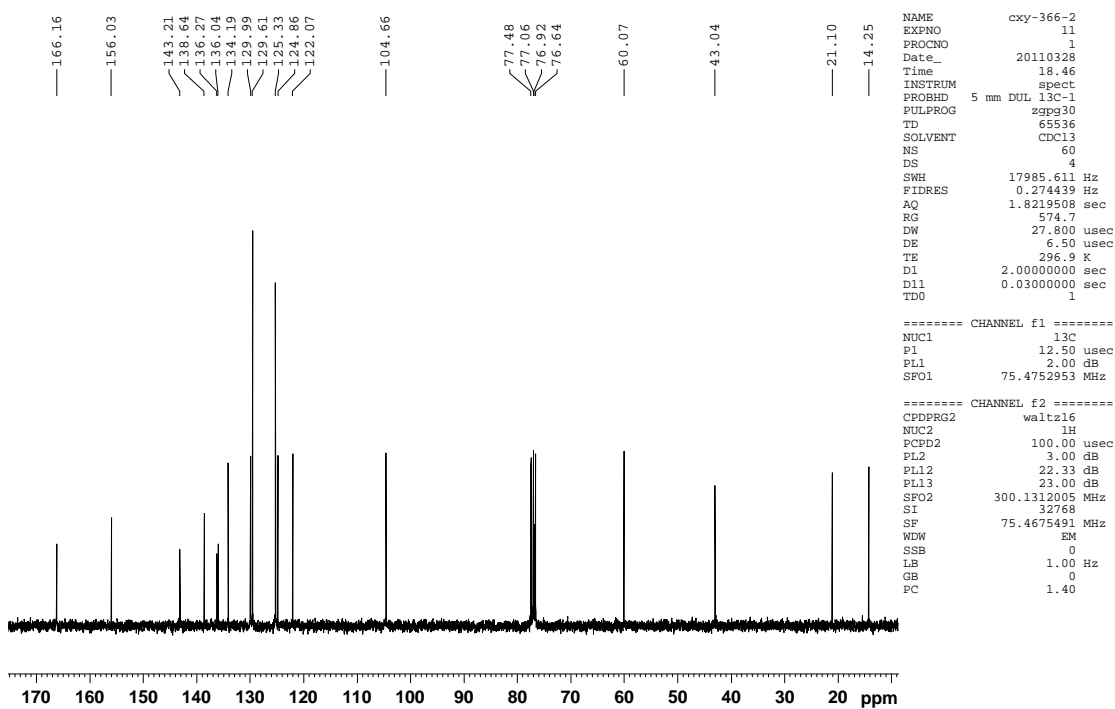

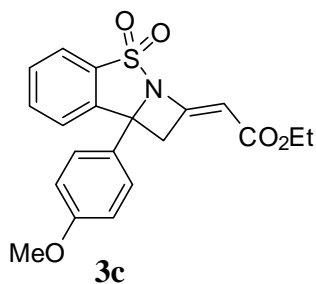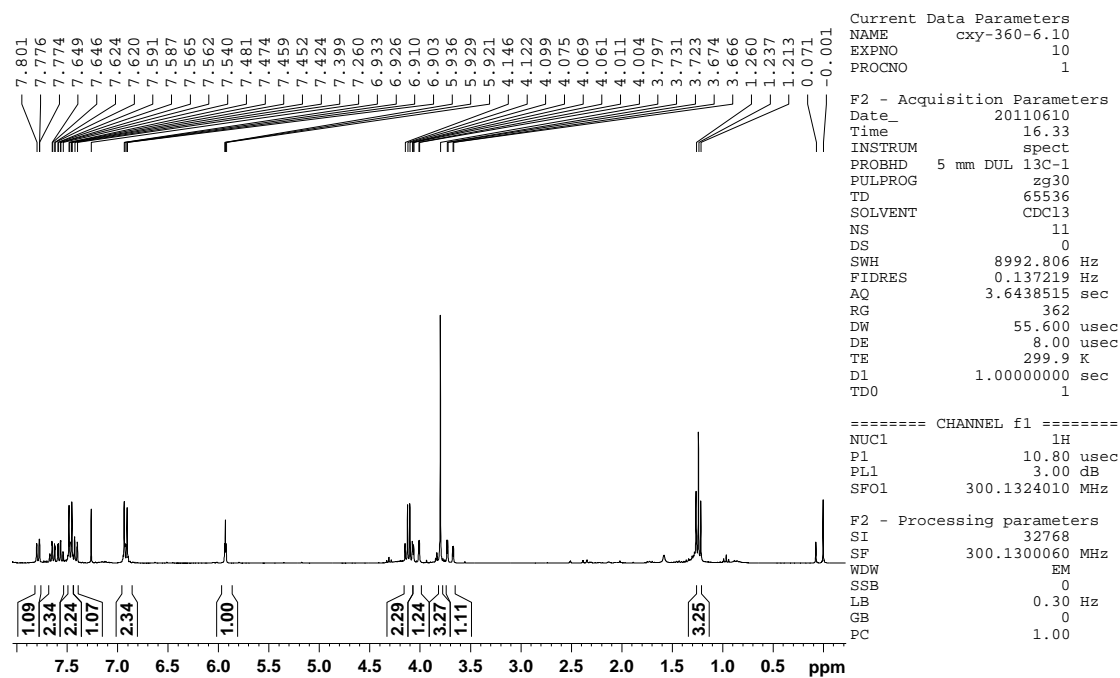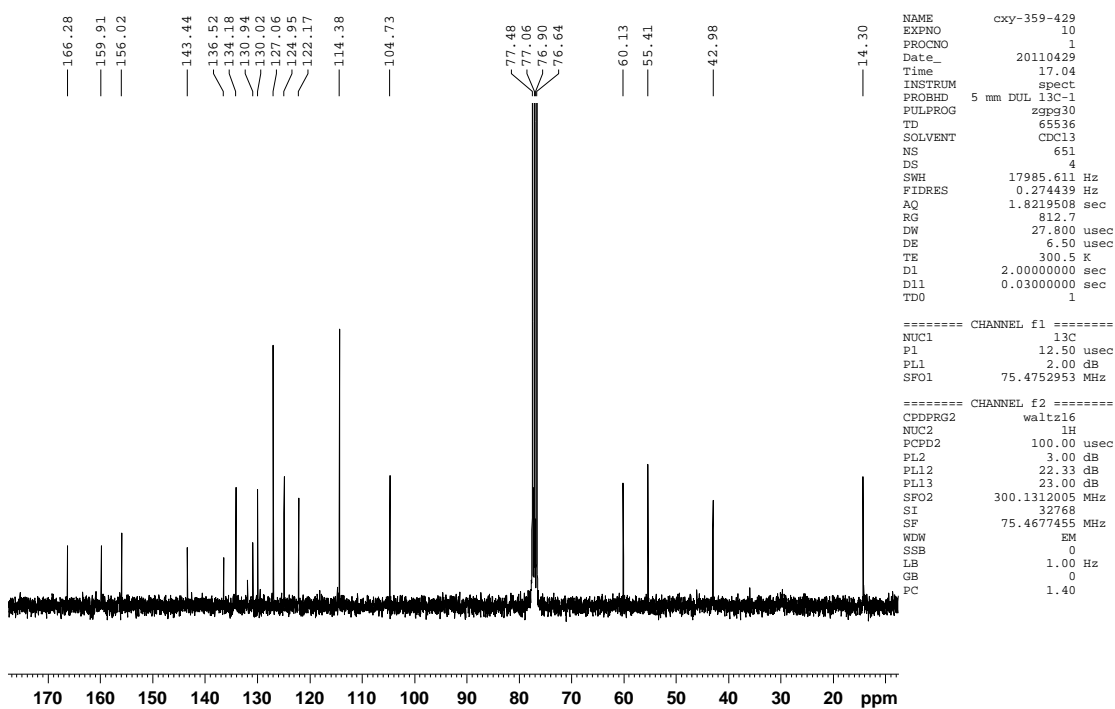

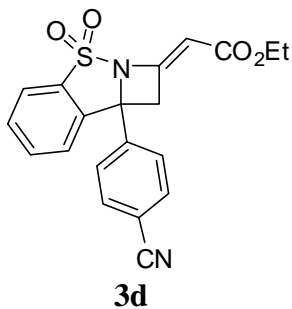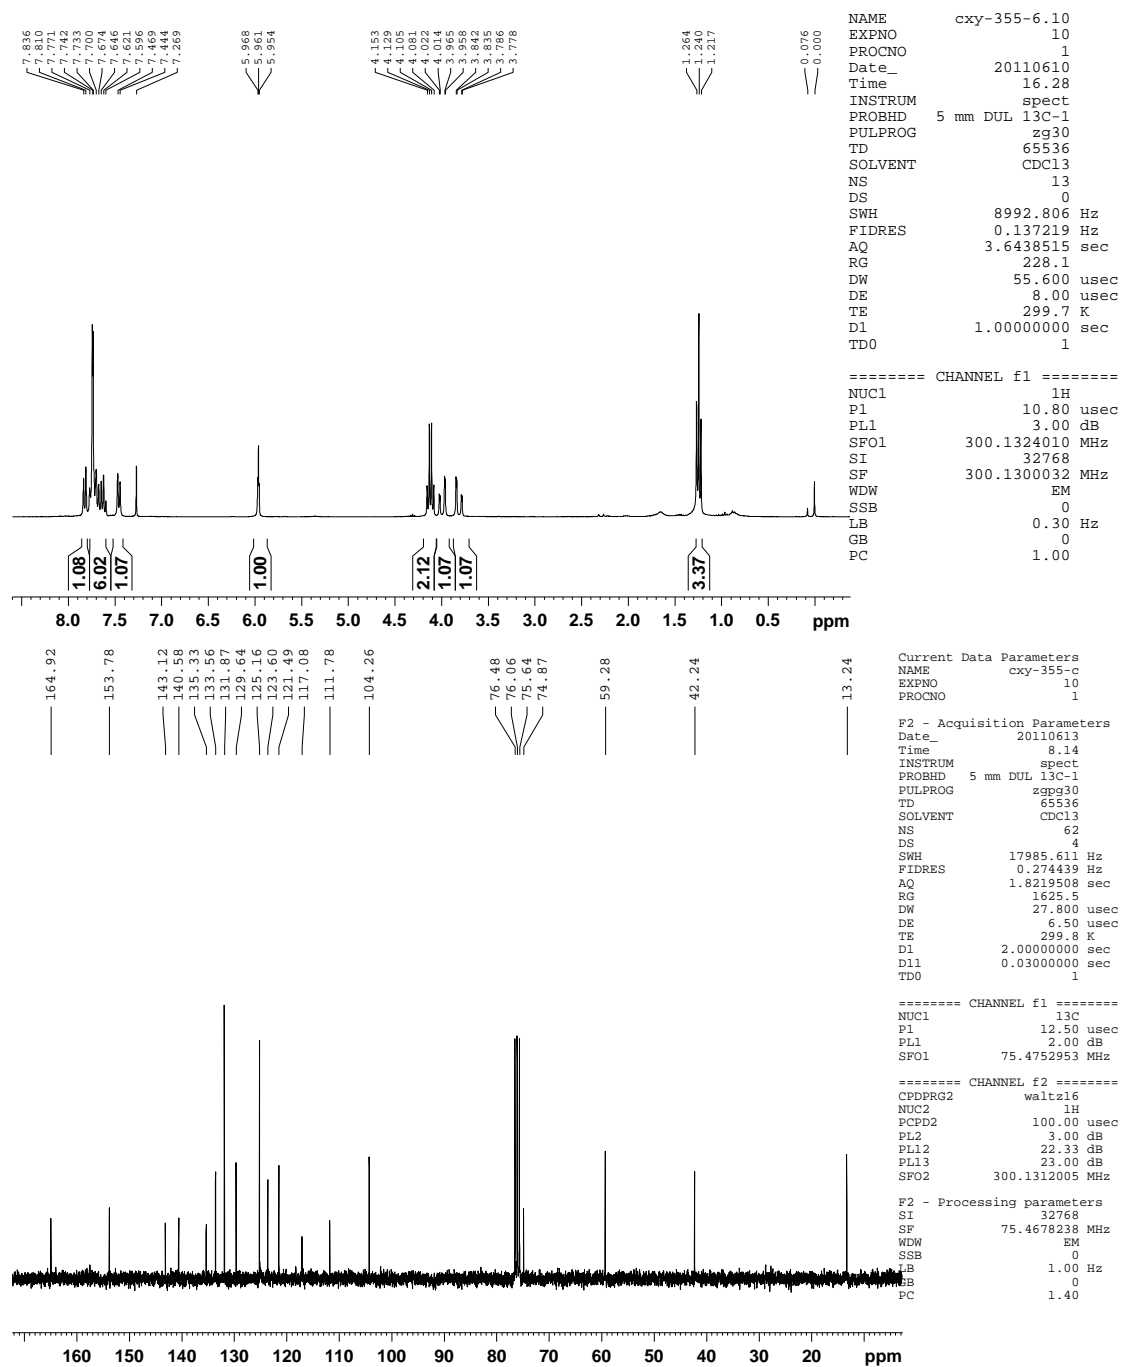

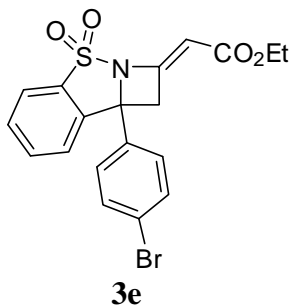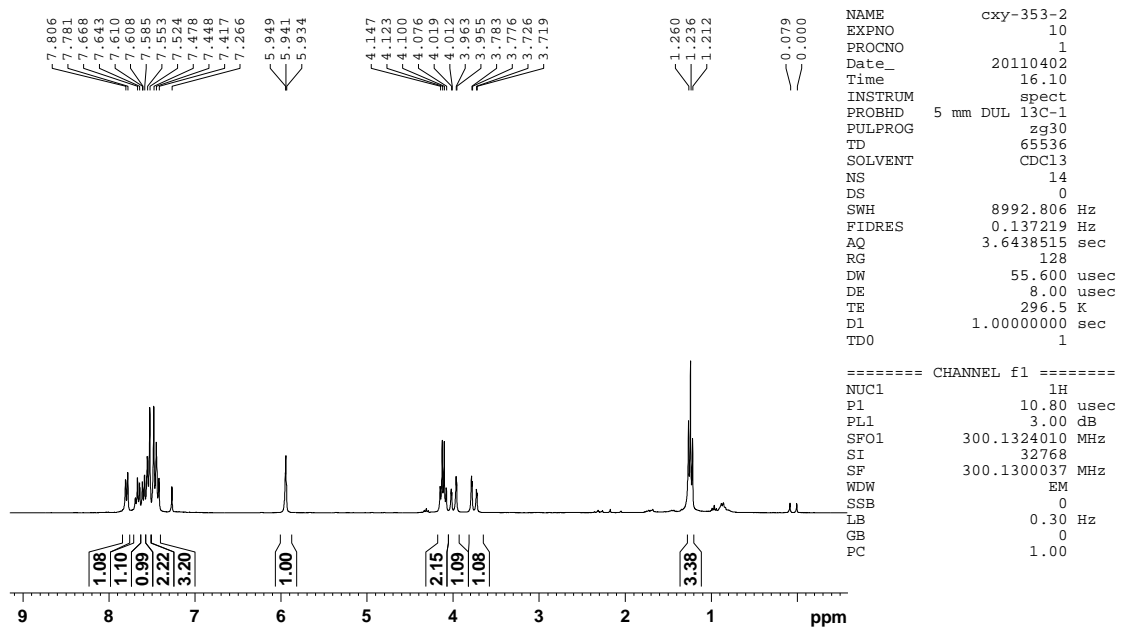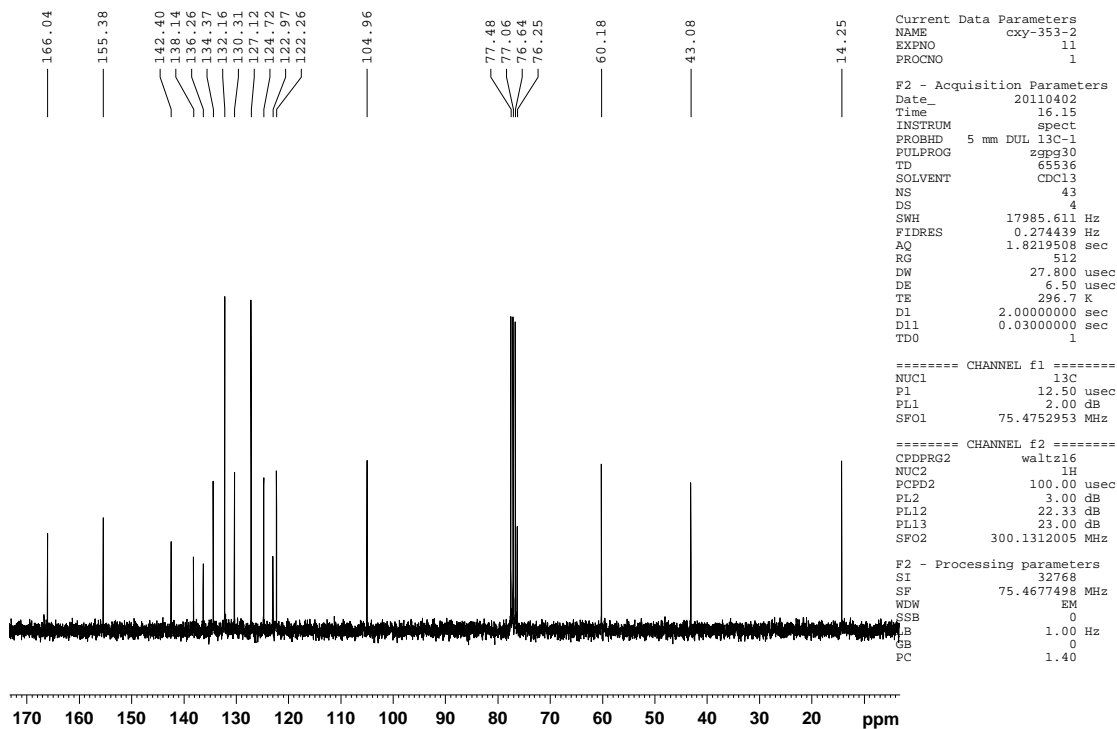

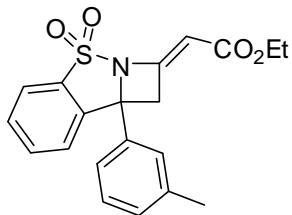

**3f**

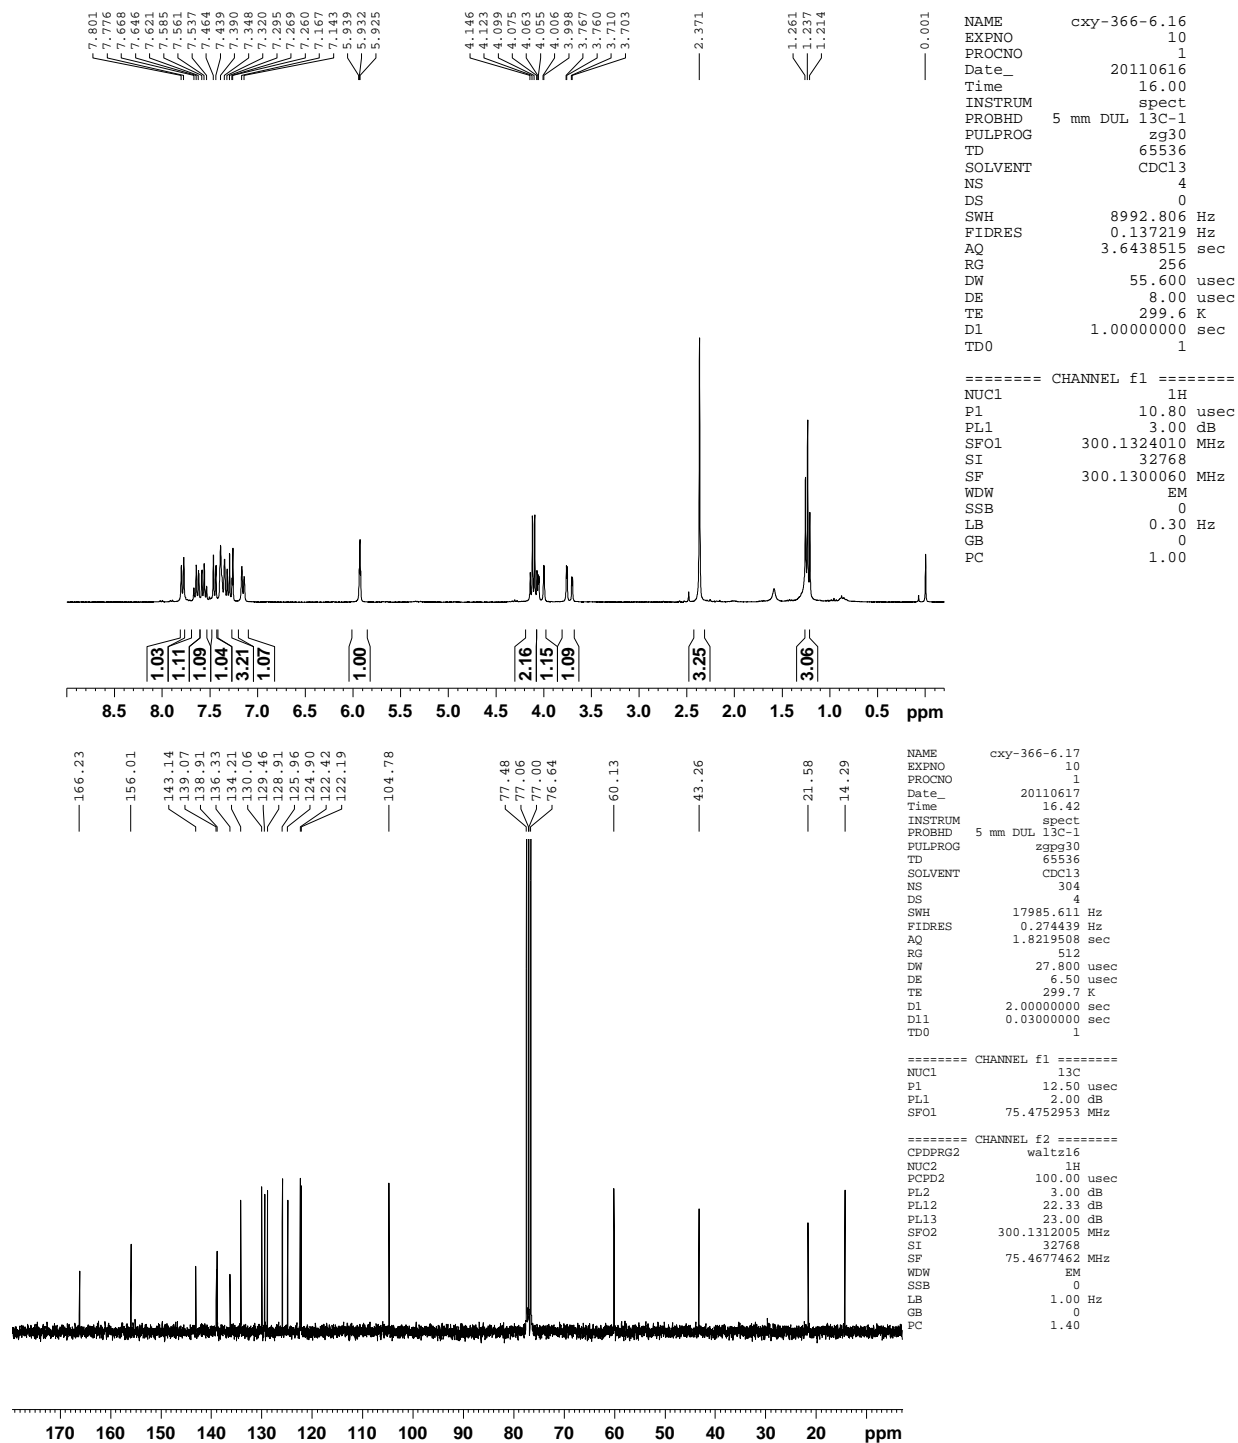



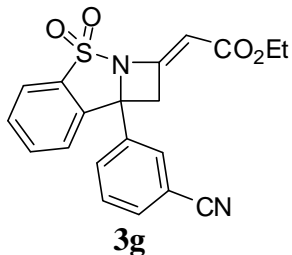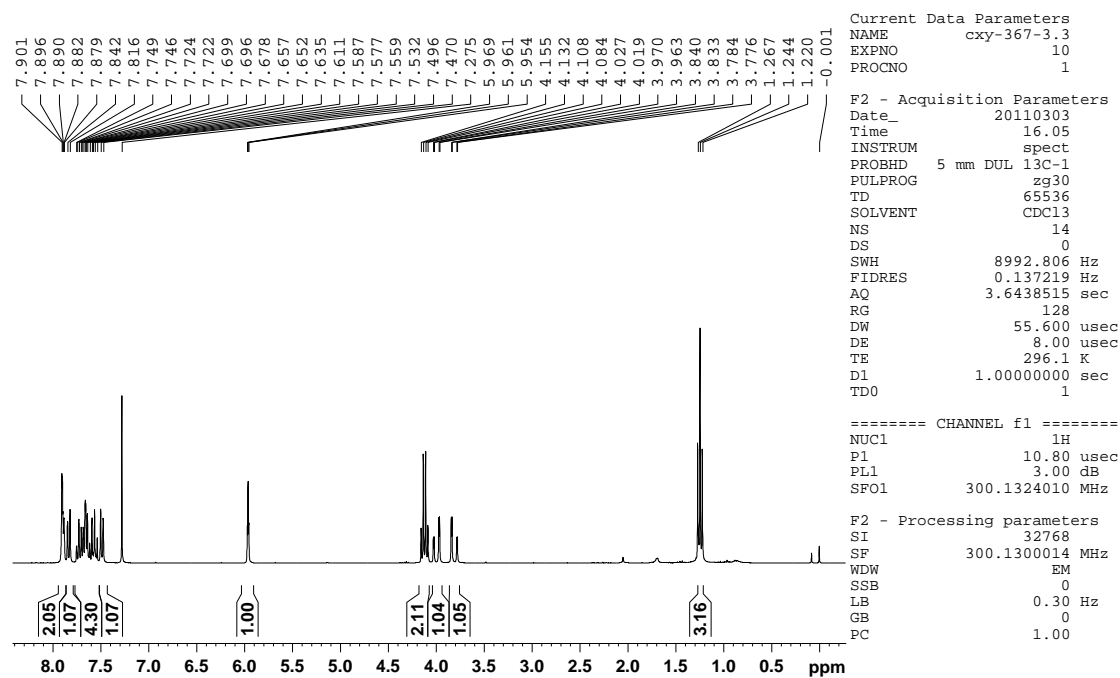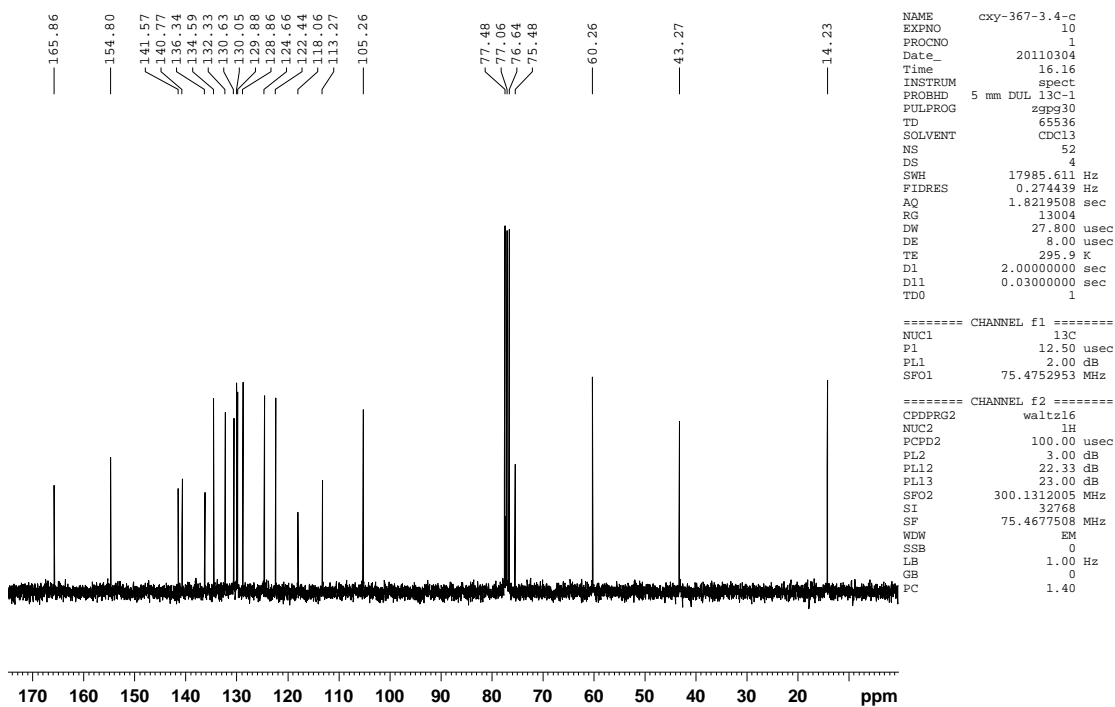

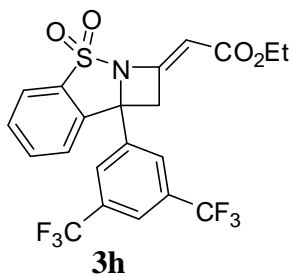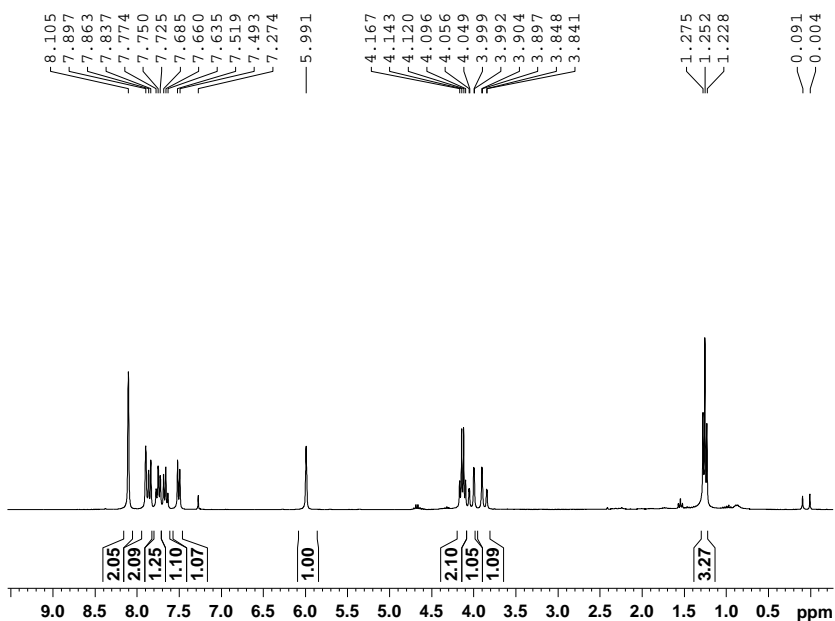

```

NAME      cxy-360-6.13
EXPNO    10
PROCNO   1
Date_    20110613
Time     19.05
INSTRUM  spect
PROBHD   5 mm DUL 13C-1
PULPROG  zg30
TD        65536
SOLVENT  CDCl3
NS        16
DS        0
SWH       8992.806 Hz
FIDRES    0.137219 Hz
AQ        3.6438515 sec
RG        128
DW        55.600 usec
DE        8.00 usec
TE        300.0 K
D1        1.0000000 sec
TD0       1
    
```

```

===== CHANNEL f1 =====
NUC1      1H
P1        10.80 usec
PL1       3.00 dB
SFO1      300.1324010 MHz
SI        32768
SF        300.1300018 MHz
WDW       EM
SSB       0
LB        0.30 Hz
GB        0
PC        1.00
    
```

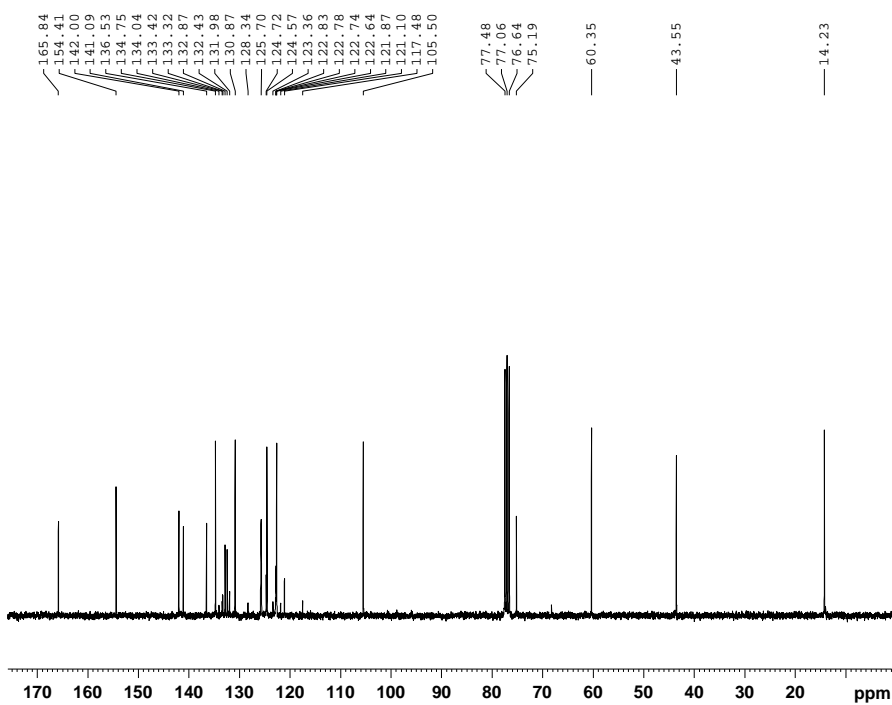

```

NAME      cxy-360-6-13-c
EXPNO    10
PROCNO   1
Date_    20110614
Time     8.16
INSTRUM  spect
PROBHD   5 mm DUL 13C-1
PULPROG  zgpg30
TD        65536
SOLVENT  CDCl3
NS        276
DS        4
SWH       17985.611 Hz
FIDRES    0.274439 Hz
AQ        1.8219508 sec
RG        574.7
DW        27.800 usec
DE        6.50 usec
TE        300.0 K
D1        2.0000000 sec
D11       0.0300000 sec
TD0       1
    
```

```

===== CHANNEL f1 =====
NUC1      13C
P1        12.50 usec
PL1       2.00 dB
SFO1      75.4752953 MHz

===== CHANNEL f2 =====
CPDPRG2  waltz16
NUC2      1H
PCPD2     100.00 usec
PL2       3.00 dB
PL12      22.33 dB
PL13      23.00 dB
SFO2      300.1312005 MHz
SI        32768
SF        75.4677461 MHz
WDW       EM
SSB       0
LB        1.00 Hz
GB        0
PC        1.40
    
```

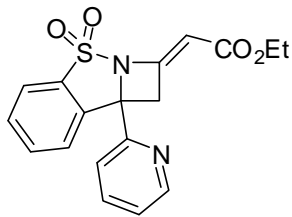

**3i**

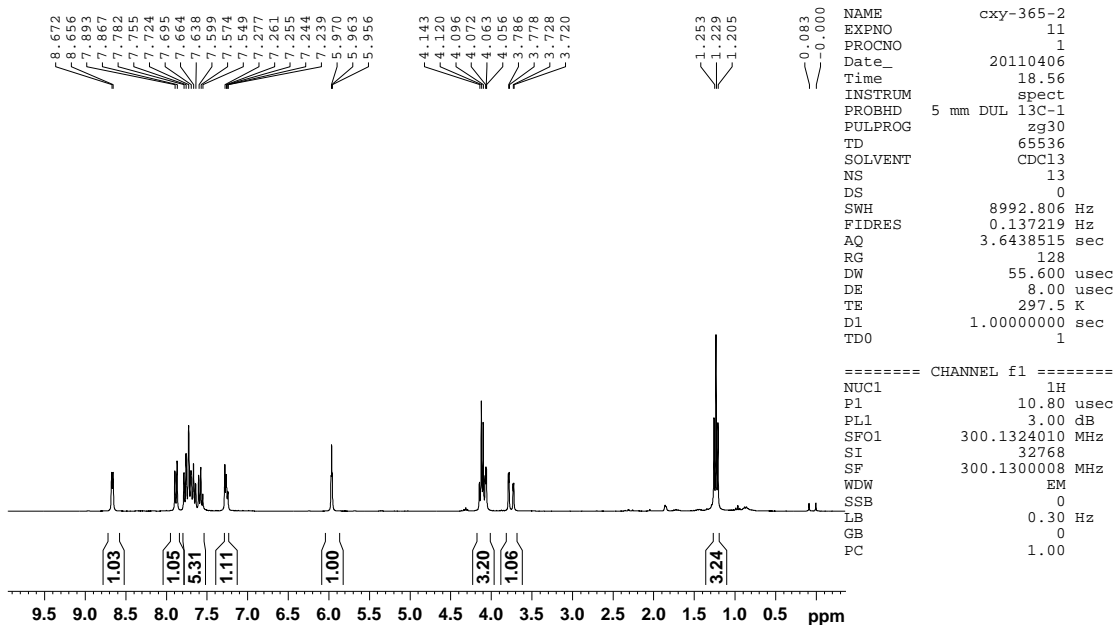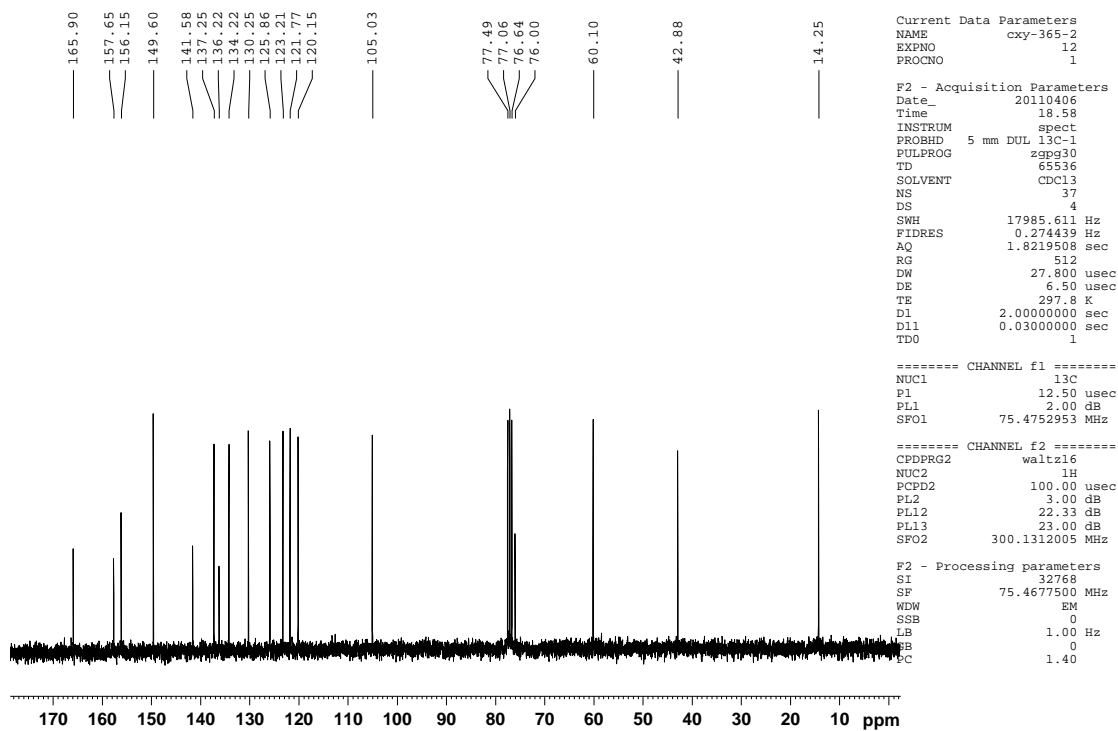

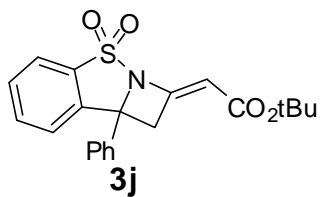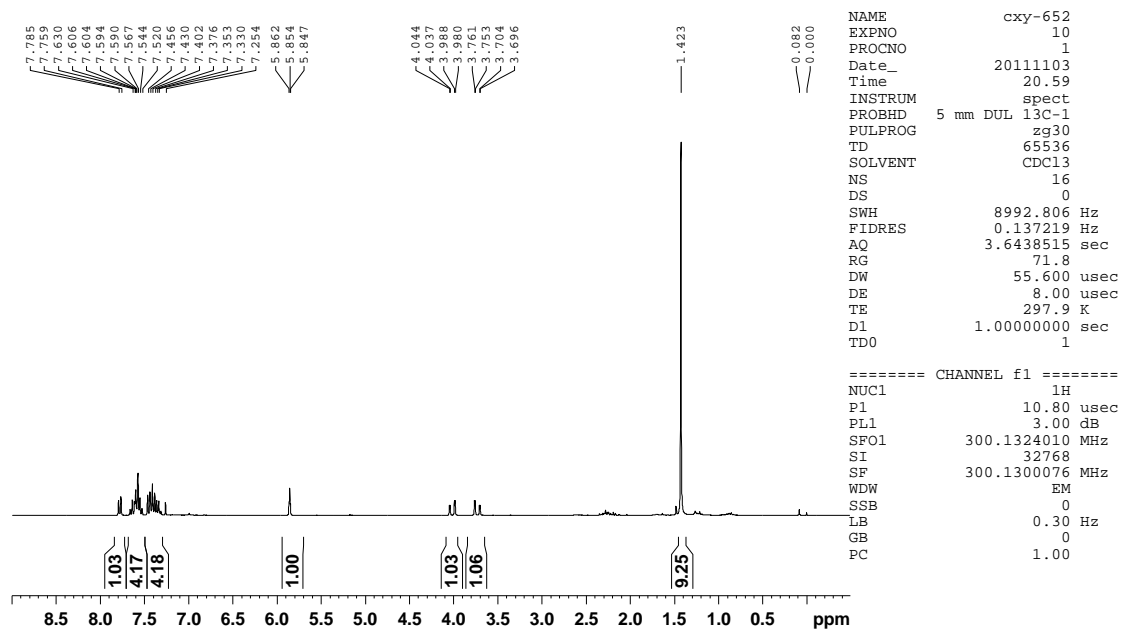

```

NAME          cxy-652
EXPNO         10
PROCNO        1
Date_         20111103
Time          20.59
INSTRUM       spect
PROBHD        5 mm DUL 13C-1
PULPROG       zg30
TD            65536
SOLVENT       CDCl3
NS            16
DS            0
SWH           8992.806 Hz
FIDRES        0.137219 Hz
AQ            3.6438515 sec
RG            71.8
DW            55.600 usec
DE            8.00 usec
TE            297.9 K
D1            1.00000000 sec
TD0           1

===== CHANNEL f1 =====
NUC1          1H
P1            10.80 usec
PL1           3.00 dB
SFO1         300.1324010 MHz
SI            32768
SF           300.1300076 MHz
WDW           EM
SSB           0
LB            0.30 Hz
GB            0
PC            1.00
    
```

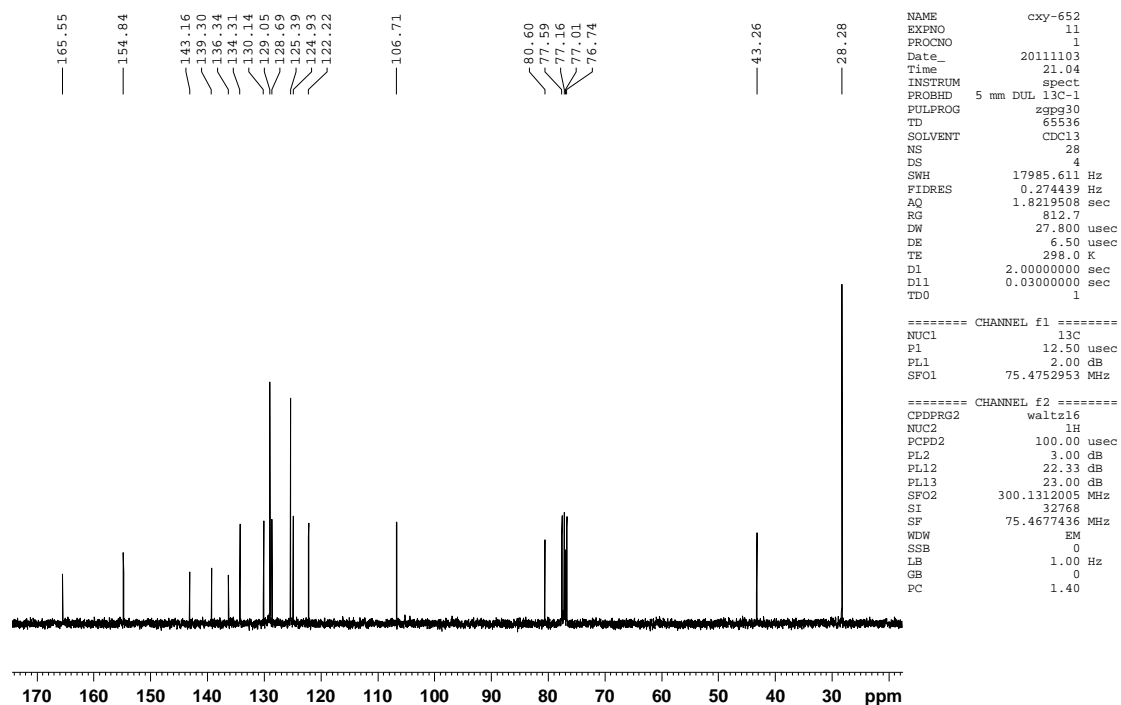

```

NAME          cxy-652
EXPNO         11
PROCNO        1
Date_         20111103
Time          21.04
INSTRUM       spect
PROBHD        5 mm DUL 13C-1
PULPROG       zgpg30
TD            65536
SOLVENT       CDCl3
NS            28
DS            4
SWH           17985.611 Hz
FIDRES        0.274439 Hz
AQ            1.8219508 sec
RG            812.7
DW            27.800 usec
DE            6.50 usec
TE            298.0 K
D1            2.00000000 sec
D11           0.03000000 sec
TD0           1

===== CHANNEL f1 =====
NUC1          13C
P1            12.50 usec
PL1           2.00 dB
SFO1         75.4752953 MHz

===== CHANNEL f2 =====
CPDPRG2       waltz16
NUC2          1H
PCPD2         100.00 usec
PL2           3.00 dB
PL12          22.33 dB
PL13          23.00 dB
SFO2         300.1312005 MHz
SI            32768
SF           75.4677436 MHz
WDW           EM
SSB           0
LB            1.00 Hz
GB            0
PC            1.40
    
```

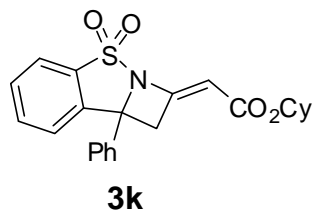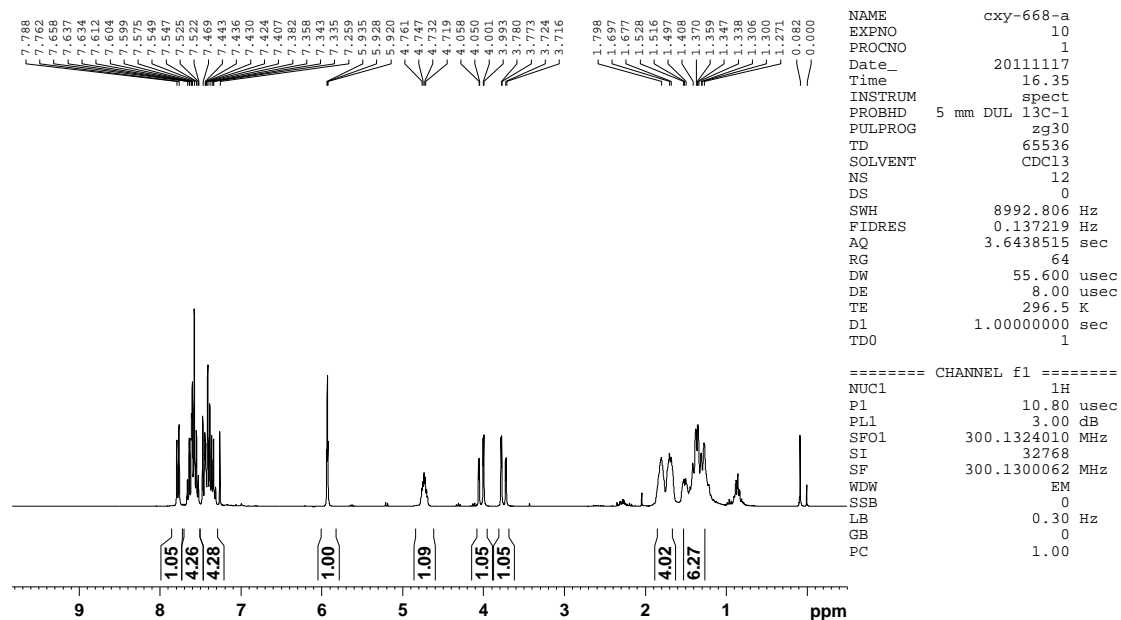

```

NAME      cxy-668-a
EXPNO    10
PROCNO    1
Date_     20111117
Time      16.35
INSTRUM   spect
PROBHD    5 mm DUL 13C-1
PULPROG   zg30
TD         65536
SOLVENT   CDCl3
NS         12
DS         0
SWH        8992.806 Hz
FIDRES     0.137219 Hz
AQ         3.6438515 sec
RG         64
DW         55.600 usec
DE         8.00 usec
TE         296.5 K
D1         1.00000000 sec
TD0        1
    
```

```

===== CHANNEL f1 =====
NUC1      1H
P1        10.80 usec
PL1       3.00 dB
SFO1     300.1324010 MHz
SI        32768
SF        300.1300062 MHz
WDW       EM
SSB       0
LB        0.30 Hz
GB        0
PC        1.00
    
```

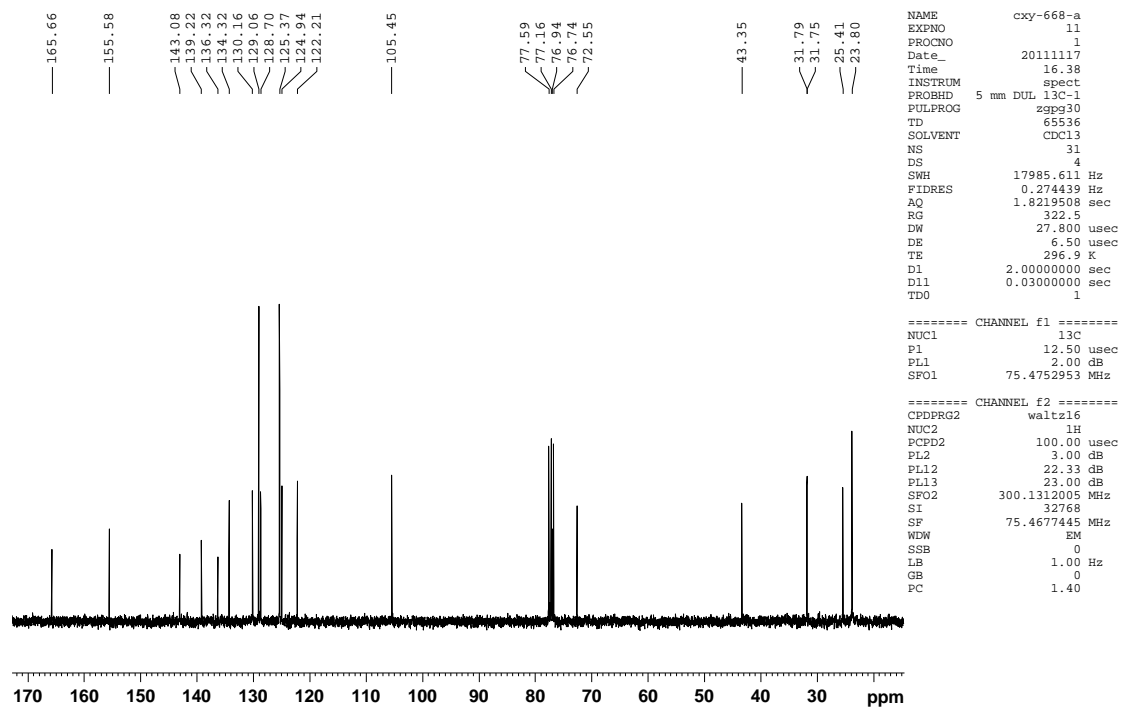

```

NAME      cxy-668-a
EXPNO    11
PROCNO    1
Date_     20111117
Time      16.38
INSTRUM   spect
PROBHD    5 mm DUL 13C-1
PULPROG   zgpg30
TD         65536
SOLVENT   CDCl3
NS         31
DS         4
SWH        17985.611 Hz
FIDRES     0.274439 Hz
AQ         1.8219508 sec
RG         322.5
DW         27.800 usec
DE         6.50 usec
TE         296.9 K
D1         2.00000000 sec
D11        0.03000000 sec
TD0        1
    
```

```

===== CHANNEL f1 =====
NUC1      13C
P1        12.50 usec
PL1       2.00 dB
SFO1     75.4752953 MHz

===== CHANNEL f2 =====
CPDPRG2   waltz16
NUC2      1H
PCPD2     100.00 usec
PL2       3.00 dB
PL12      22.33 dB
PL13      23.00 dB
SFO2     300.1312005 MHz
SI        32768
SF        75.4677445 MHz
WDW       EM
SSB       0
LB        1.00 Hz
GB        0
PC        1.40
    
```

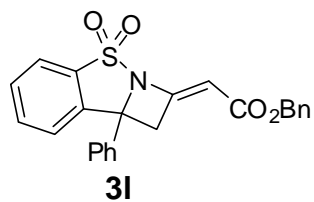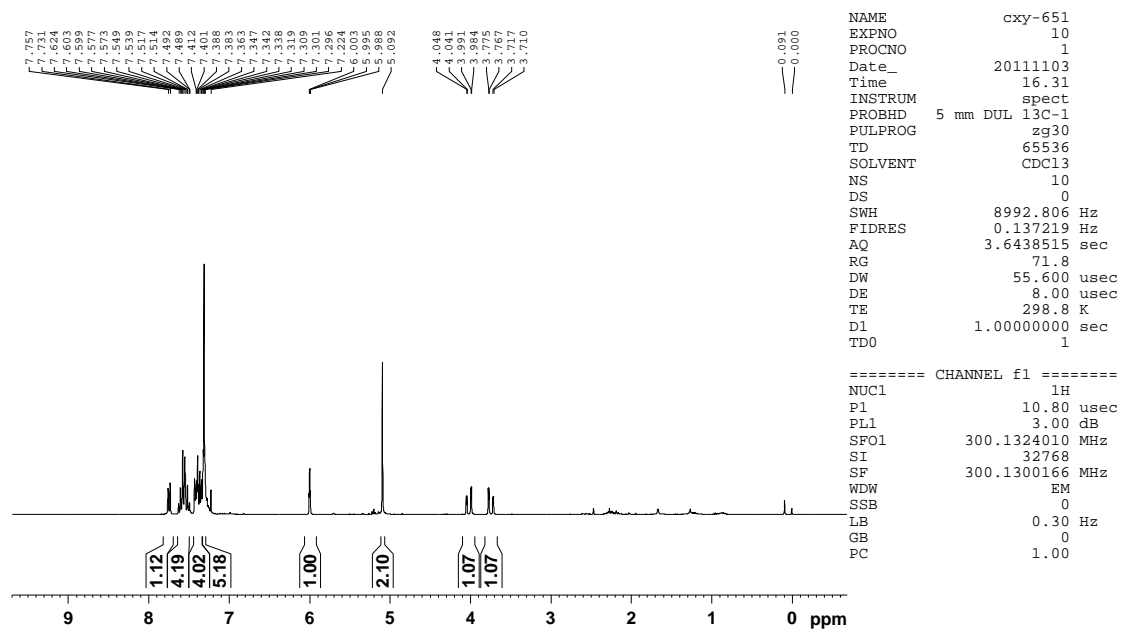

```

NAME          cxy-651
EXPNO         10
PROCNO        1
Date_         20111103
Time          16.31
INSTRUM       spect
PROBHD        5 mm DUL 13C-1
PULPROG       zg30
TD            65536
SOLVENT       CDCl3
NS            10
DS            0
SWH           8992.806 Hz
FIDRES        0.137219 Hz
AQ            3.6438515 sec
RG            71.8
DW            55.600 usec
DE            8.00 usec
TE            298.8 K
D1            1.00000000 sec
TD0           1

===== CHANNEL f1 =====
NUC1          1H
P1            10.80 usec
PL1           3.00 dB
SF01          300.1324010 MHz
SI            32768
SF            300.1300166 MHz
WDW           EM
SSB           0
LB            0.30 Hz
GB            0
PC            1.00
    
```

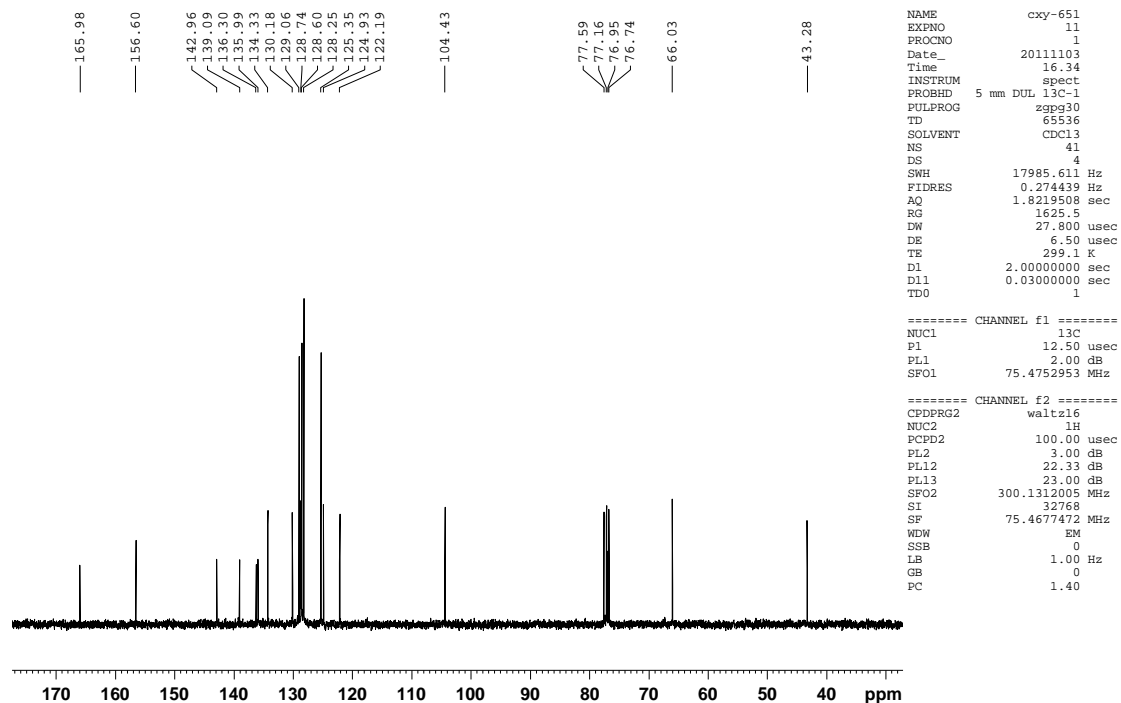

```

NAME          cxy-651
EXPNO         11
PROCNO        1
Date_         20111103
Time          16.34
INSTRUM       spect
PROBHD        5 mm DUL 13C-1
PULPROG       zgpg30
TD            65536
SOLVENT       CDCl3
NS            41
DS            4
SWH           17985.611 Hz
FIDRES        0.274439 Hz
AQ            1.8219508 sec
RG            1625.5
DW            27.800 usec
DE            6.50 usec
TE            299.1 K
D1            2.00000000 sec
D11           0.03000000 sec
TD0           1

===== CHANNEL f1 =====
NUC1          13C
P1            12.50 usec
PL1           2.00 dB
SF01          75.4752953 MHz

===== CHANNEL f2 =====
CPDPRG2       waltz16
NUC2          1H
PCPD2         100.00 usec
PL2           3.00 dB
PL12          22.33 dB
PL13          23.00 dB
SF02          300.1312005 MHz
SI            32768
SF            75.4677472 MHz
WDW           EM
SSB           0
LB            1.00 Hz
GB            0
PC            1.40
    
```

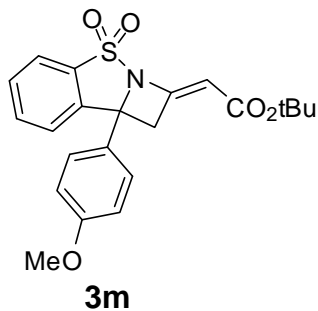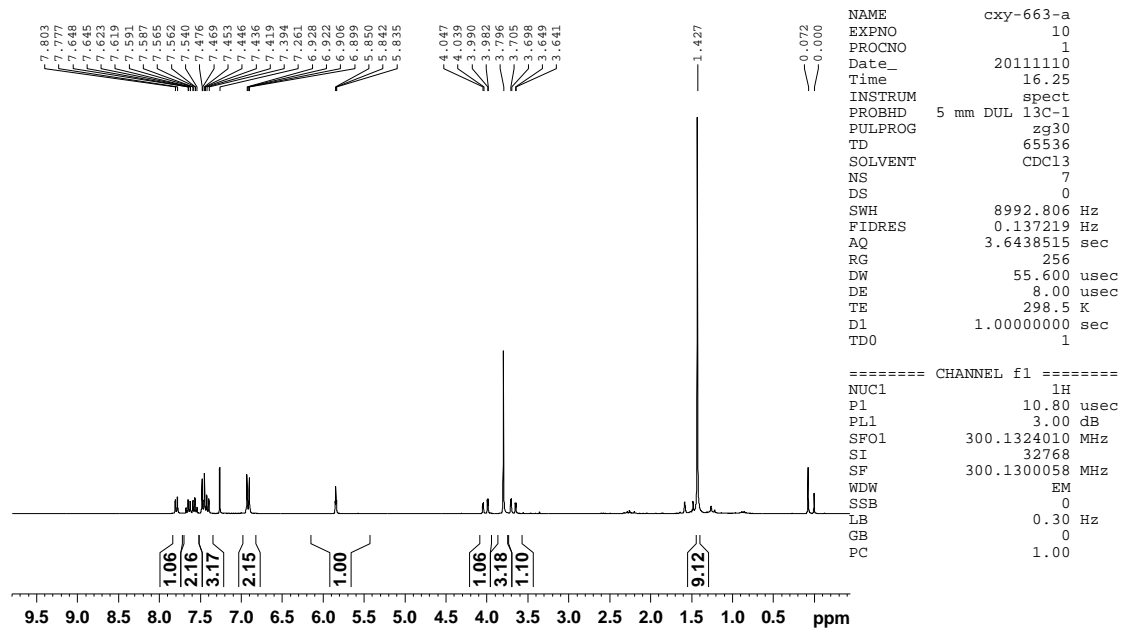

```

NAME      cxy-663-a
EXPNO    10
PROCNO   1
Date_    20111110
Time     16.25
INSTRUM  spect
PROBHD   5 mm DUL 13C-1
PULPROG  zg30
TD       65536
SOLVENT  CDCl3
NS       7
DS       0
SWH      8992.806 Hz
FIDRES   0.137219 Hz
AQ       3.6438515 sec
RG       256
DW       55.600 usec
DE       8.00 usec
TE       298.5 K
D1       1.00000000 sec
TD0      1

===== CHANNEL f1 =====
NUC1     1H
P1       10.80 usec
PL1      3.00 dB
SFO1     300.1324010 MHz
SI       32768
SF       300.1300058 MHz
WDW      EM
SSB      0
LB       0.30 Hz
GB       0
PC       1.00
    
```

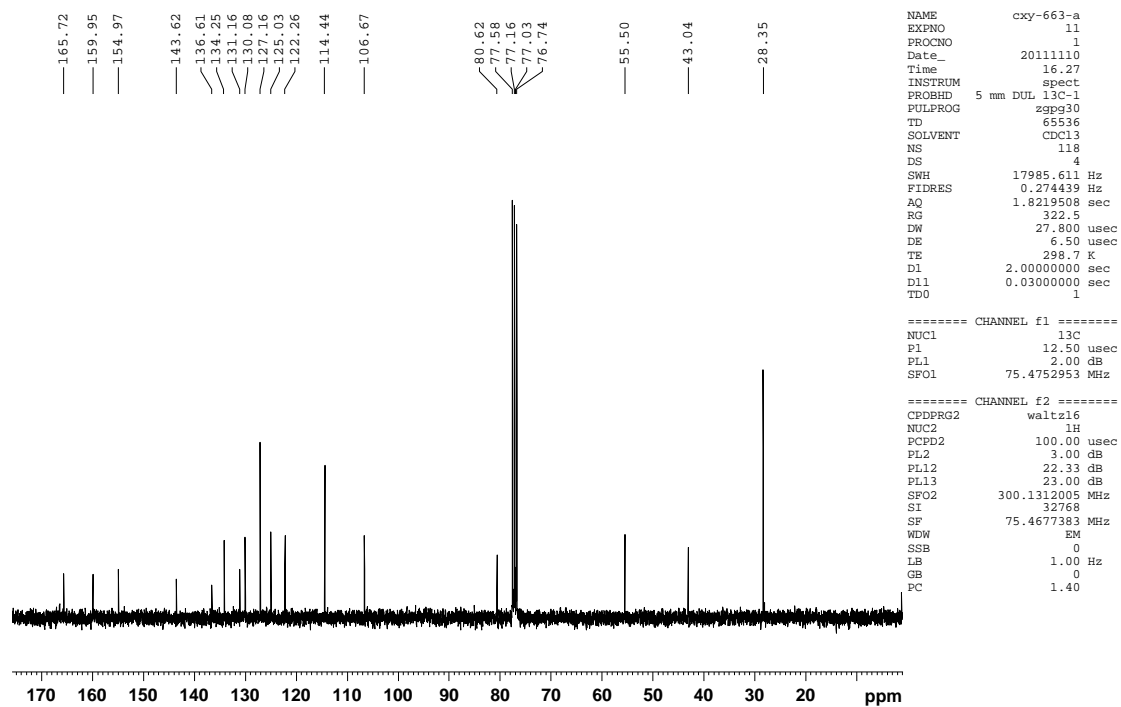

```

NAME      cxy-663-a
EXPNO    11
PROCNO   1
Date_    20111110
Time     16.27
INSTRUM  spect
PROBHD   5 mm DUL 13C-1
PULPROG  zgpg30
TD       65536
SOLVENT  CDCl3
NS       118
DS       4
SWH      17985.611 Hz
FIDRES   0.274439 Hz
AQ       1.8219508 sec
RG       322.5
DW       27.800 usec
DE       6.50 usec
TE       298.7 K
D1       2.00000000 sec
D11      0.03000000 sec
TD0      1

===== CHANNEL f1 =====
NUC1     13C
P1       12.50 usec
PL1      2.00 dB
SFO1     75.4752953 MHz

===== CHANNEL f2 =====
CPDPRG2  waltz16
NUC2     1H
PCPD2   100.00 usec
PL2      3.00 dB
PL12    22.33 dB
PL13    23.00 dB
SFO2    300.1312005 MHz
SI       32768
SF       75.4677383 MHz
WDW      EM
SSB      0
LB       1.00 Hz
GB       0
PC       1.40
    
```

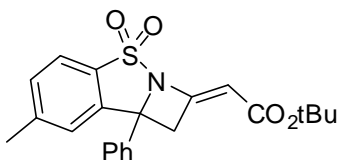

**3a'**

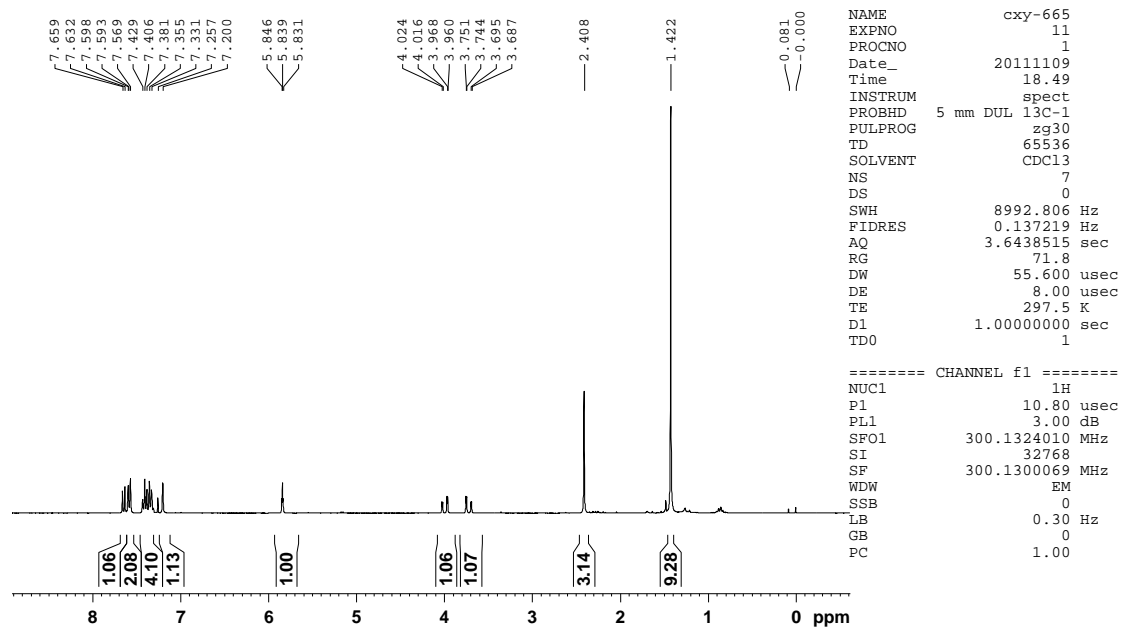

```

NAME      cxy-665
EXPNO    11
PROCNO   1
Date_    20111109
Time     18.49
INSTRUM  spect
PROBHD   5 mm DUL 13C-1
PULPROG  zg30
TD       65536
SOLVENT  CDCl3
NS       7
DS       0
SWH      8992.806 Hz
FIDRES   0.137219 Hz
AQ       3.6438515 sec
RG       71.8
DW       55.600 usec
DE       8.00 usec
TE       297.5 K
D1       1.00000000 sec
TD0      1
    
```

```

===== CHANNEL f1 =====
NUC1      1H
P1        10.80 usec
PL1       3.00 dB
SFO1     300.1324010 MHz
SI        32768
SF        300.1300069 MHz
WDW       EM
SSB       0
LB        0.30 Hz
GB        0
PC        1.00
    
```

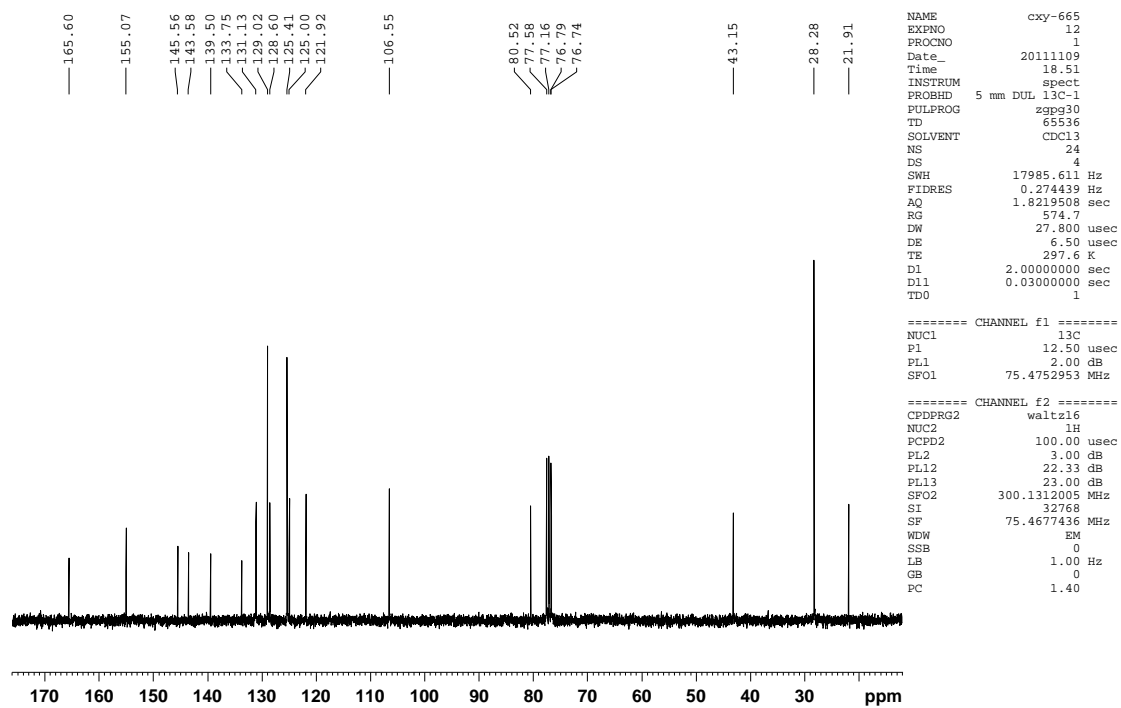

```

NAME      cxy-665
EXPNO    12
PROCNO   1
Date_    20111109
Time     18.51
INSTRUM  spect
PROBHD   5 mm DUL 13C-1
PULPROG  zgpg30
TD       65536
SOLVENT  CDCl3
NS       24
DS       4
SWH      17985.611 Hz
FIDRES   0.274439 Hz
AQ       1.8219508 sec
RG       574.7
DW       27.800 usec
DE       6.50 usec
TE       297.6 K
D1       2.00000000 sec
D11      0.03000000 sec
TD0      1
    
```

```

===== CHANNEL f1 =====
NUC1      13C
P1        12.50 usec
PL1       2.00 dB
SFO1     75.4752953 MHz

===== CHANNEL f2 =====
CPDPRG2  waltz16
NUC2     1H
PCPD2    100.00 usec
PL2      3.00 dB
PL12     22.33 dB
PL13     23.00 dB
SFO2     300.1312005 MHz
SI        32768
SF        75.4677436 MHz
WDW       EM
SSB       0
LB        1.00 Hz
GB        0
PC        1.40
    
```



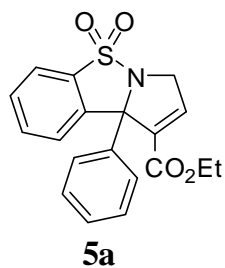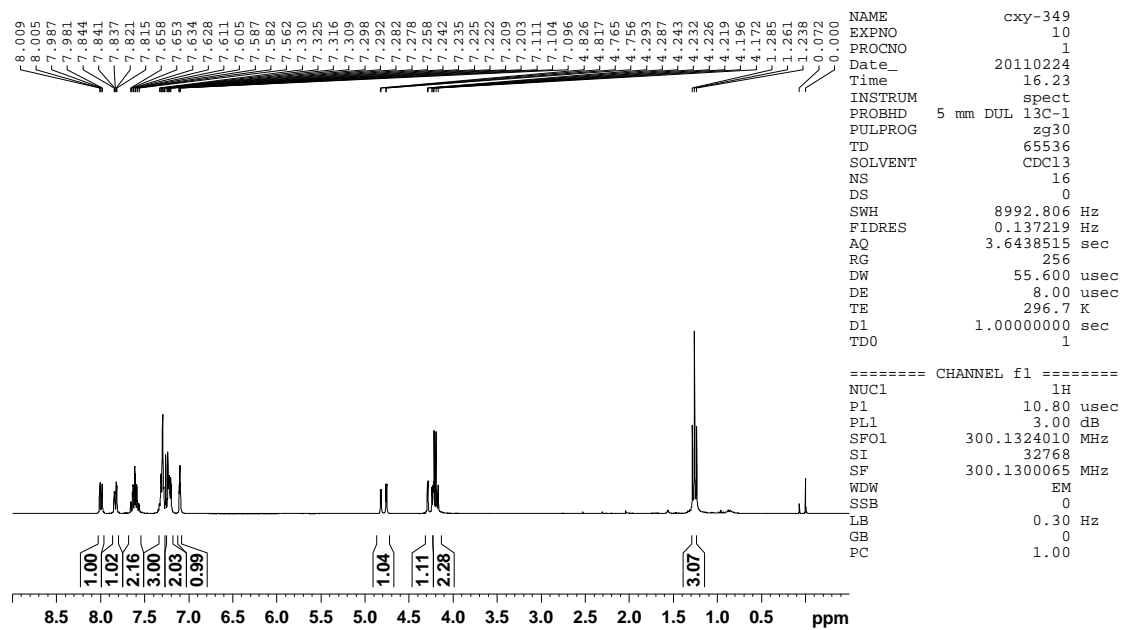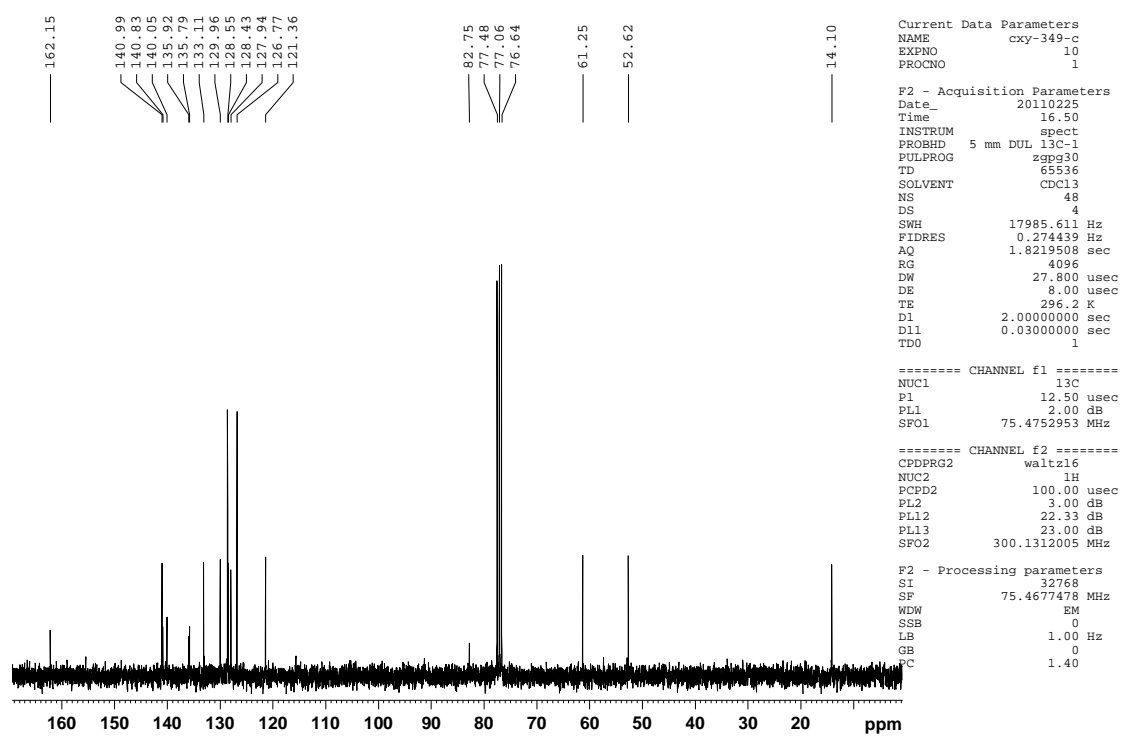

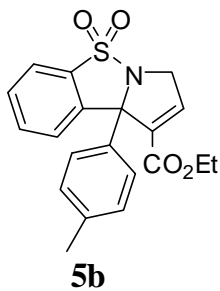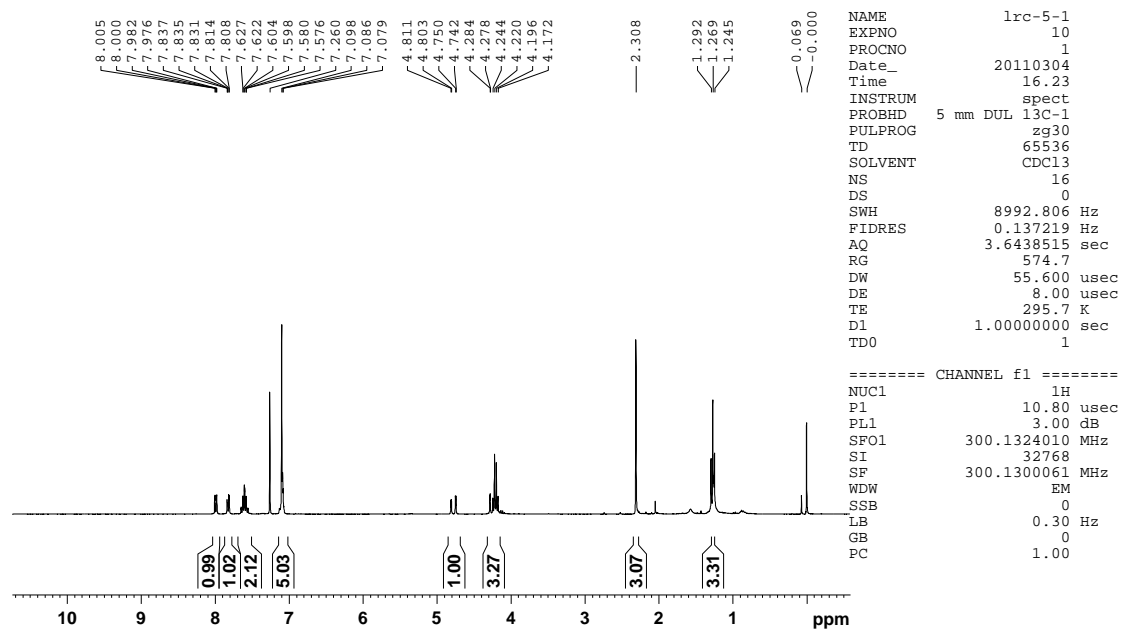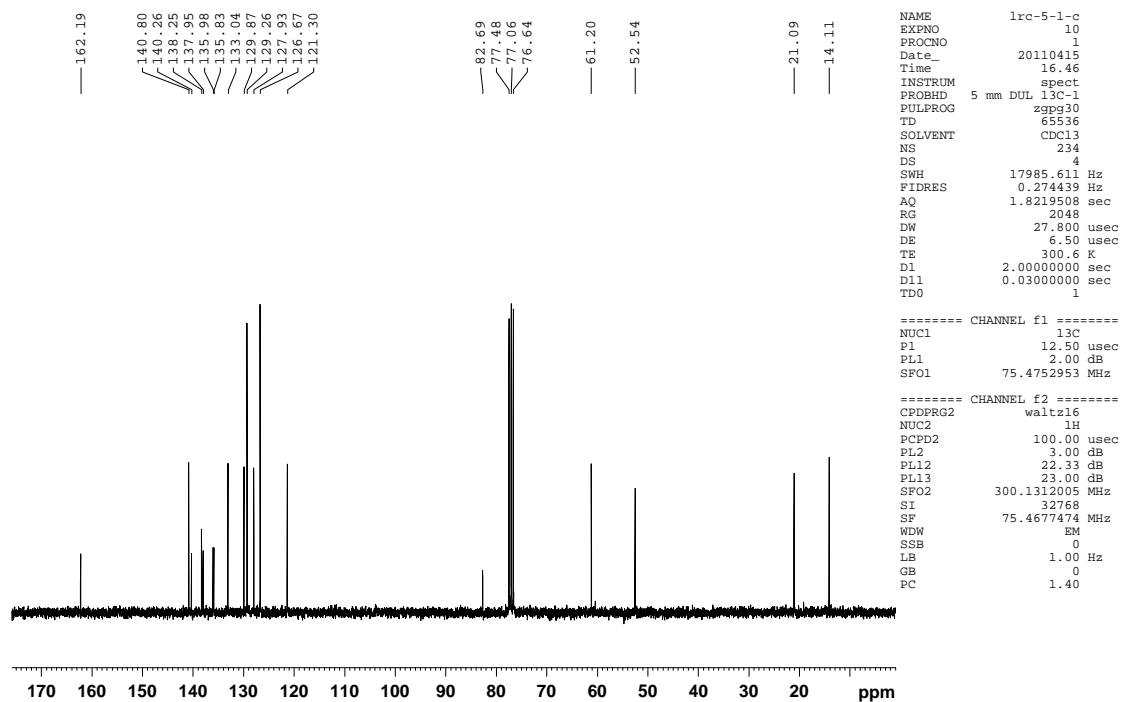

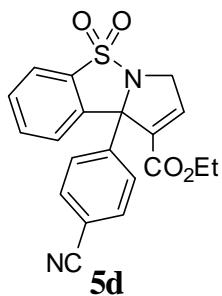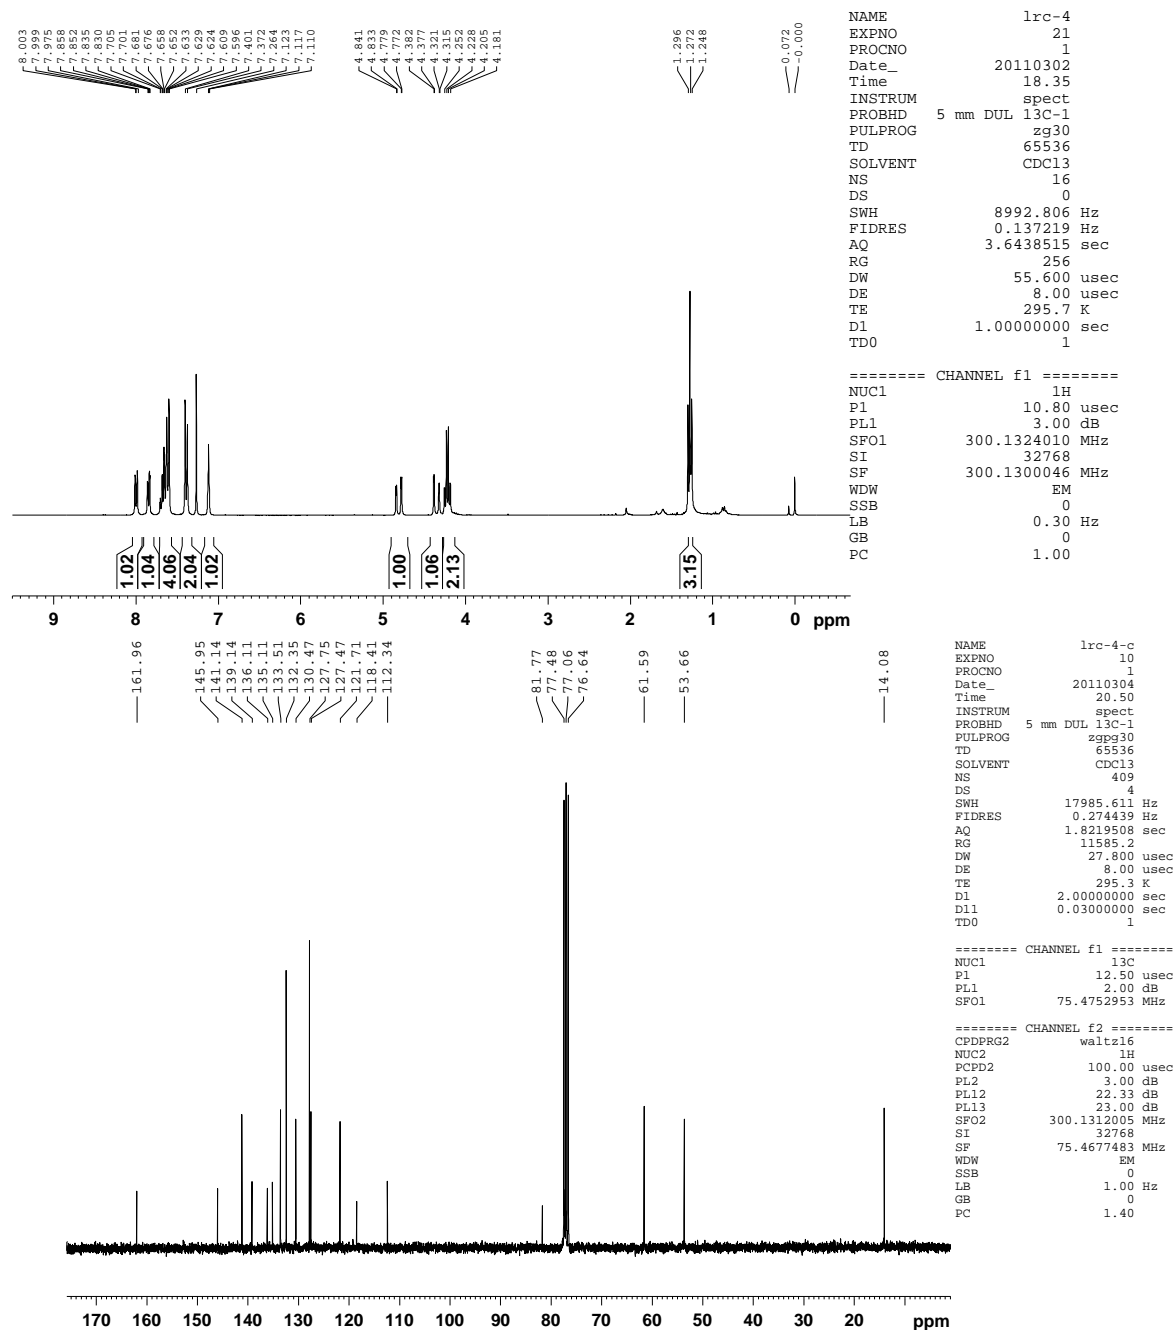

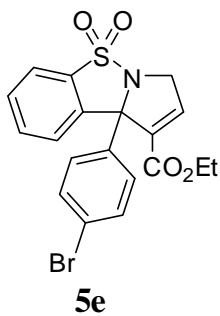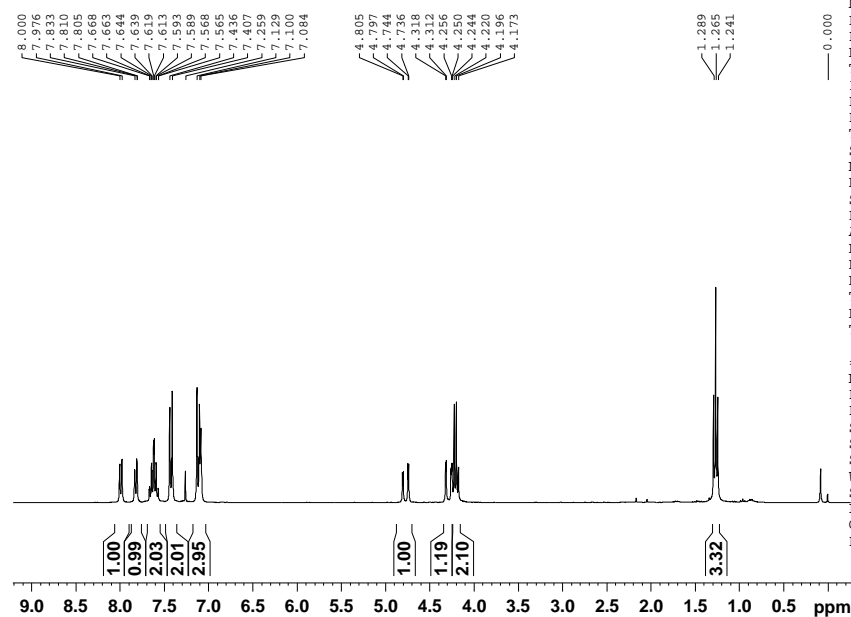

```

NAME          cxy-353-3
EXPNO         10
PROCNO        1
Date_         20110413
Time          8.12
INSTRUM       spect
PROBHD        5 mm DUL 13C-1
PULPROG       zg30
TD            65536
SOLVENT       CDCl3
NS            16
DS            0
SWH           8992.806 Hz
FIDRES        0.137219 Hz
AQ            3.6438515 sec
RG            128
DW            55.600 usec
DE            8.00 usec
TE            298.2 K
D1            1.00000000 sec
D10           1
===== CHANNEL f1 =====
NUC1          1H
P1            10.80 usec
PL1           3.00 dB
SFO1          300.1324010 MHz
SI            32768
SF            300.1300061 MHz
WDW           EM
SSB           0
LB            0.30 Hz
GB            0
PC            1.00
    
```

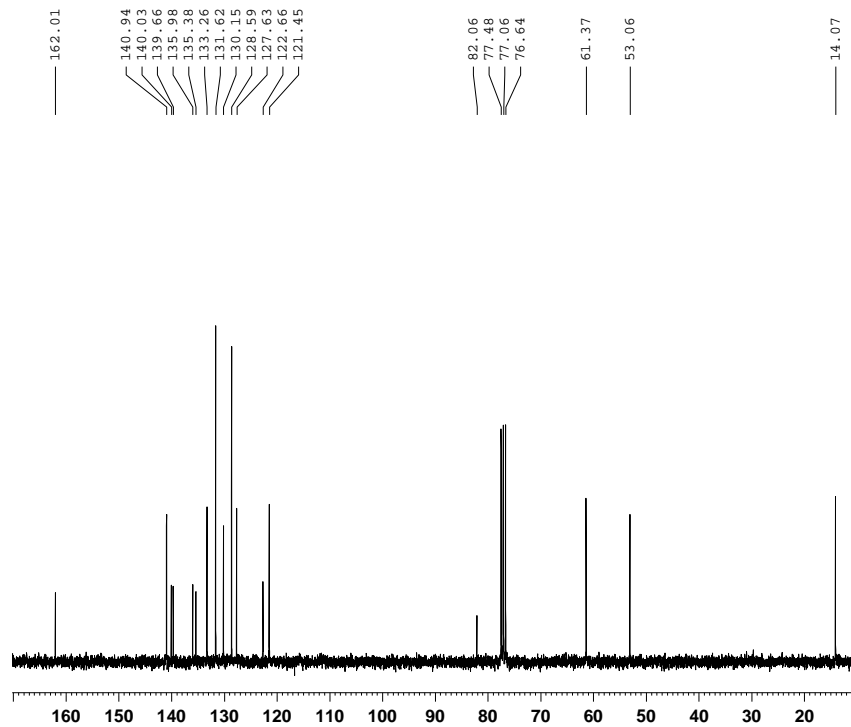

```

Current Data Parameters
NAME          cxy-353-3
EXPNO         11
PROCNO        1
F2 - Acquisition Parameters
Date_         20110413
Time          8.14
INSTRUM       spect
PROBHD        5 mm DUL 13C-1
PULPROG       zgpg30
TD            65536
SOLVENT       CDCl3
NS            51
DS            4
SWH           17985.611 Hz
FIDRES        0.274439 Hz
AQ            1.8219508 sec
RG            812.7
DW            27.800 usec
DE            6.50 usec
TE            298.5 K
D1            2.00000000 sec
D11           0.03000000 sec
D10           1
===== CHANNEL f1 =====
NUC1          13C
P1            12.50 usec
PL1           2.00 dB
SFO1          75.4752953 MHz
===== CHANNEL f2 =====
CPDPRG2       waltz16
NUC2          1H
PCPD2         100.00 usec
PL2           3.00 dB
PL12          22.33 dB
PL13          23.00 dB
SFO2          300.1312005 MHz
F2 - Processing parameters
SI            32768
SF            75.4677507 MHz
WDW           EM
SSB           0
LB            1.00 Hz
GB            0
PC            1.40
    
```

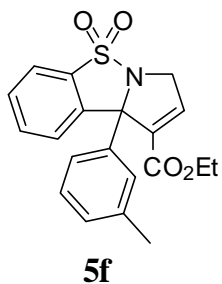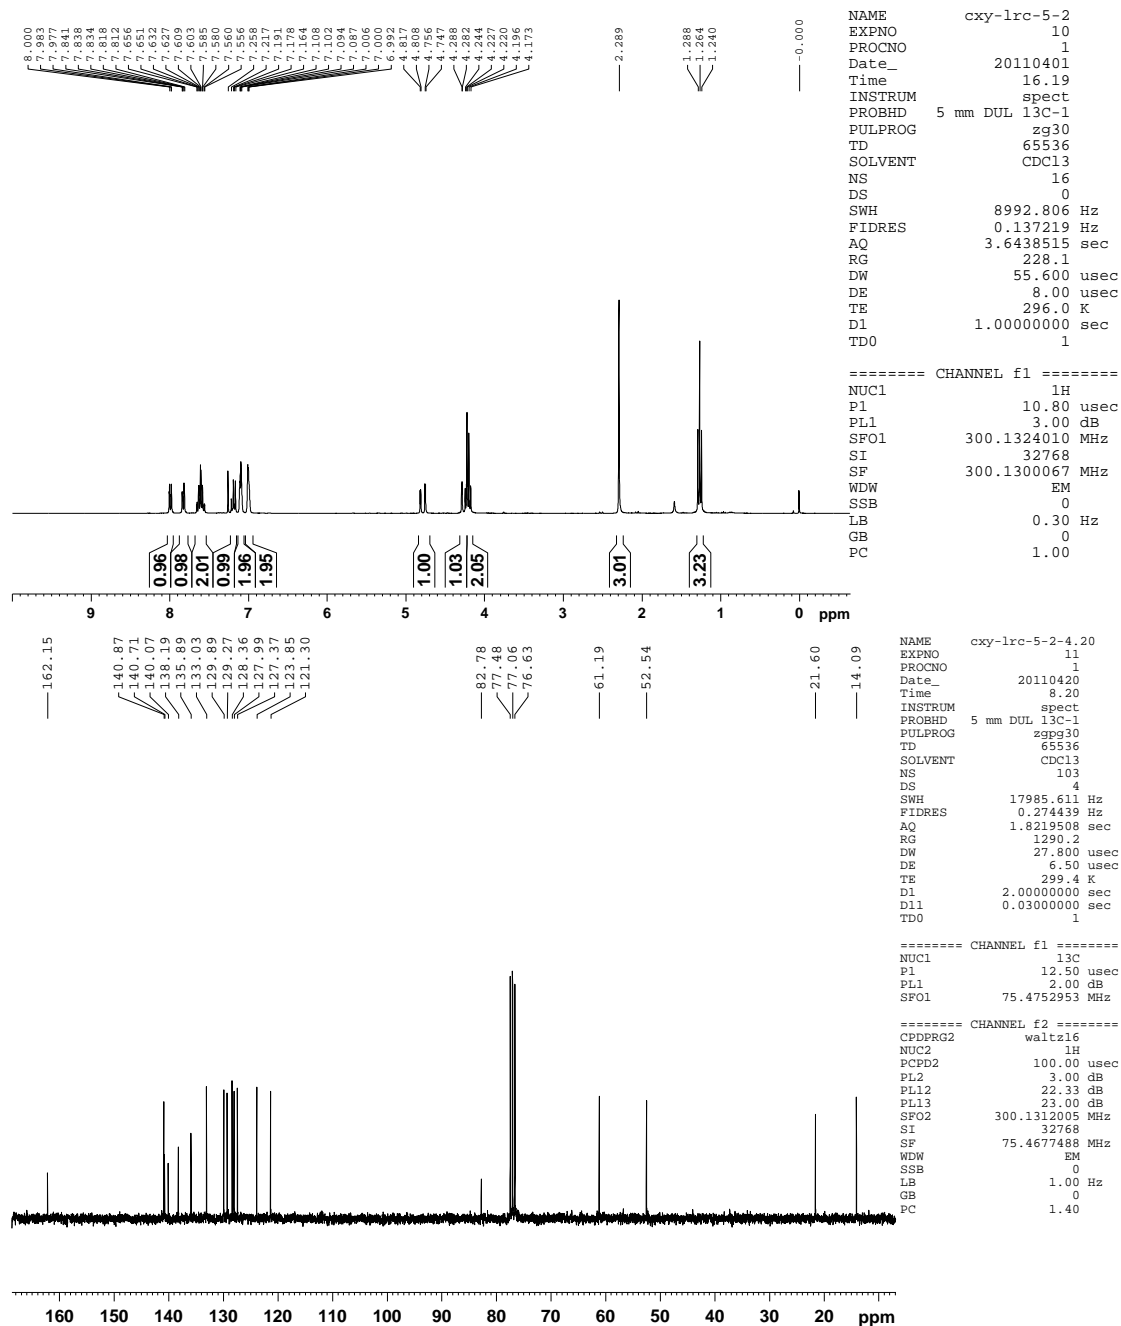

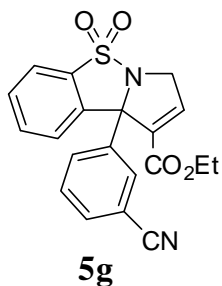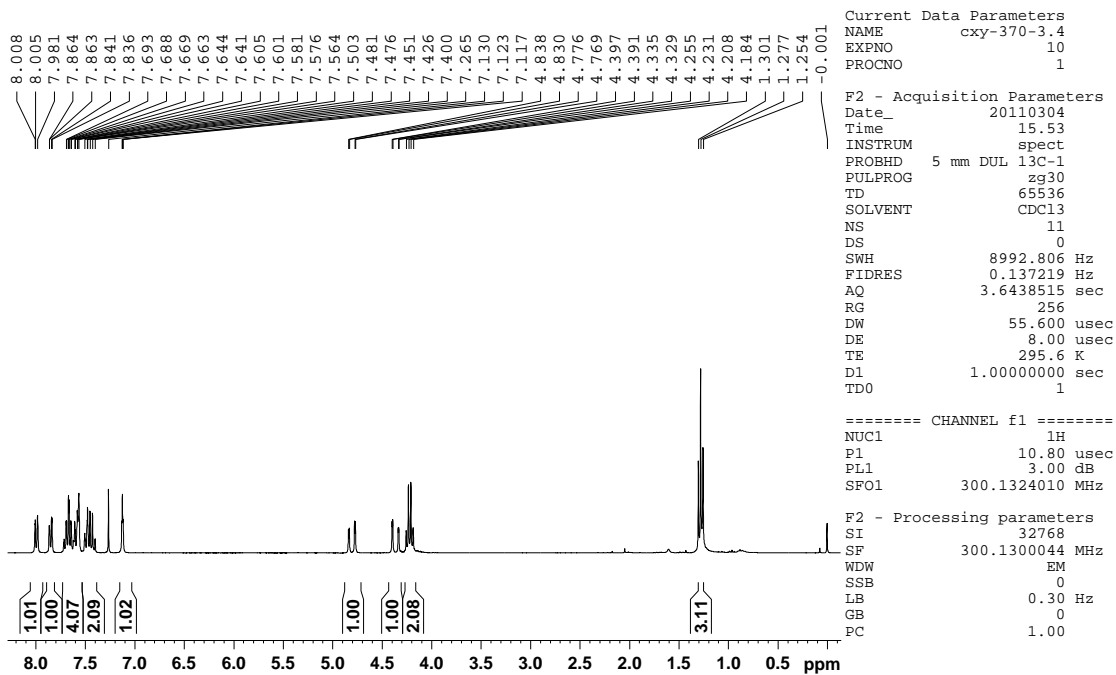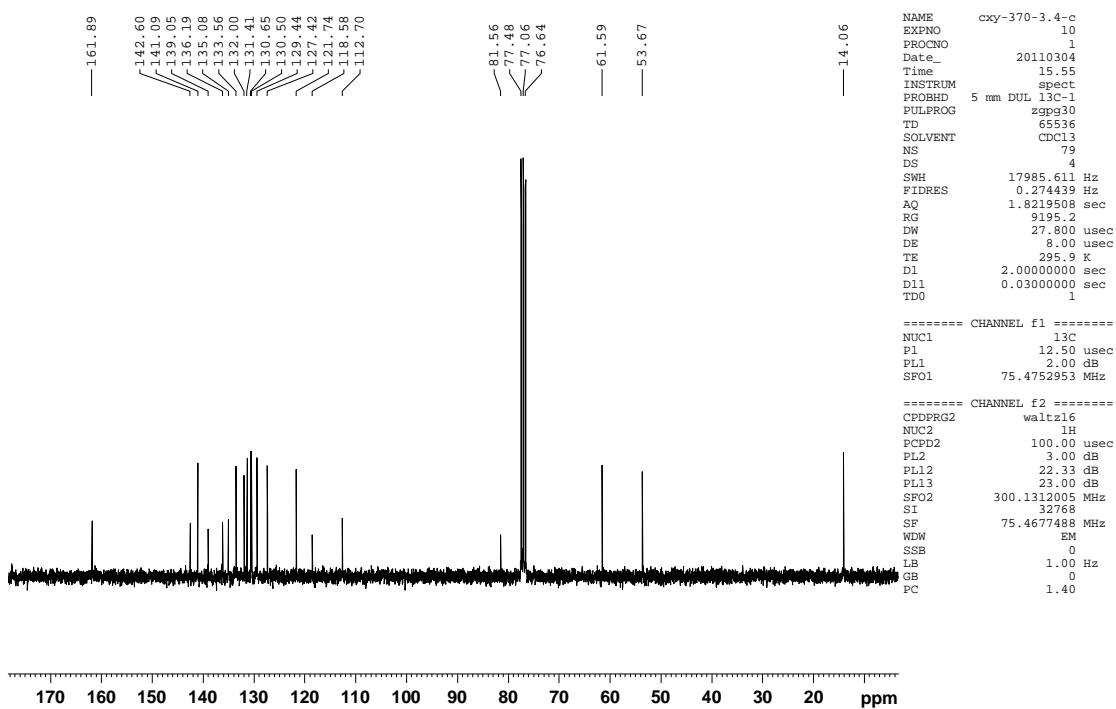

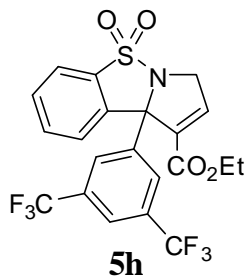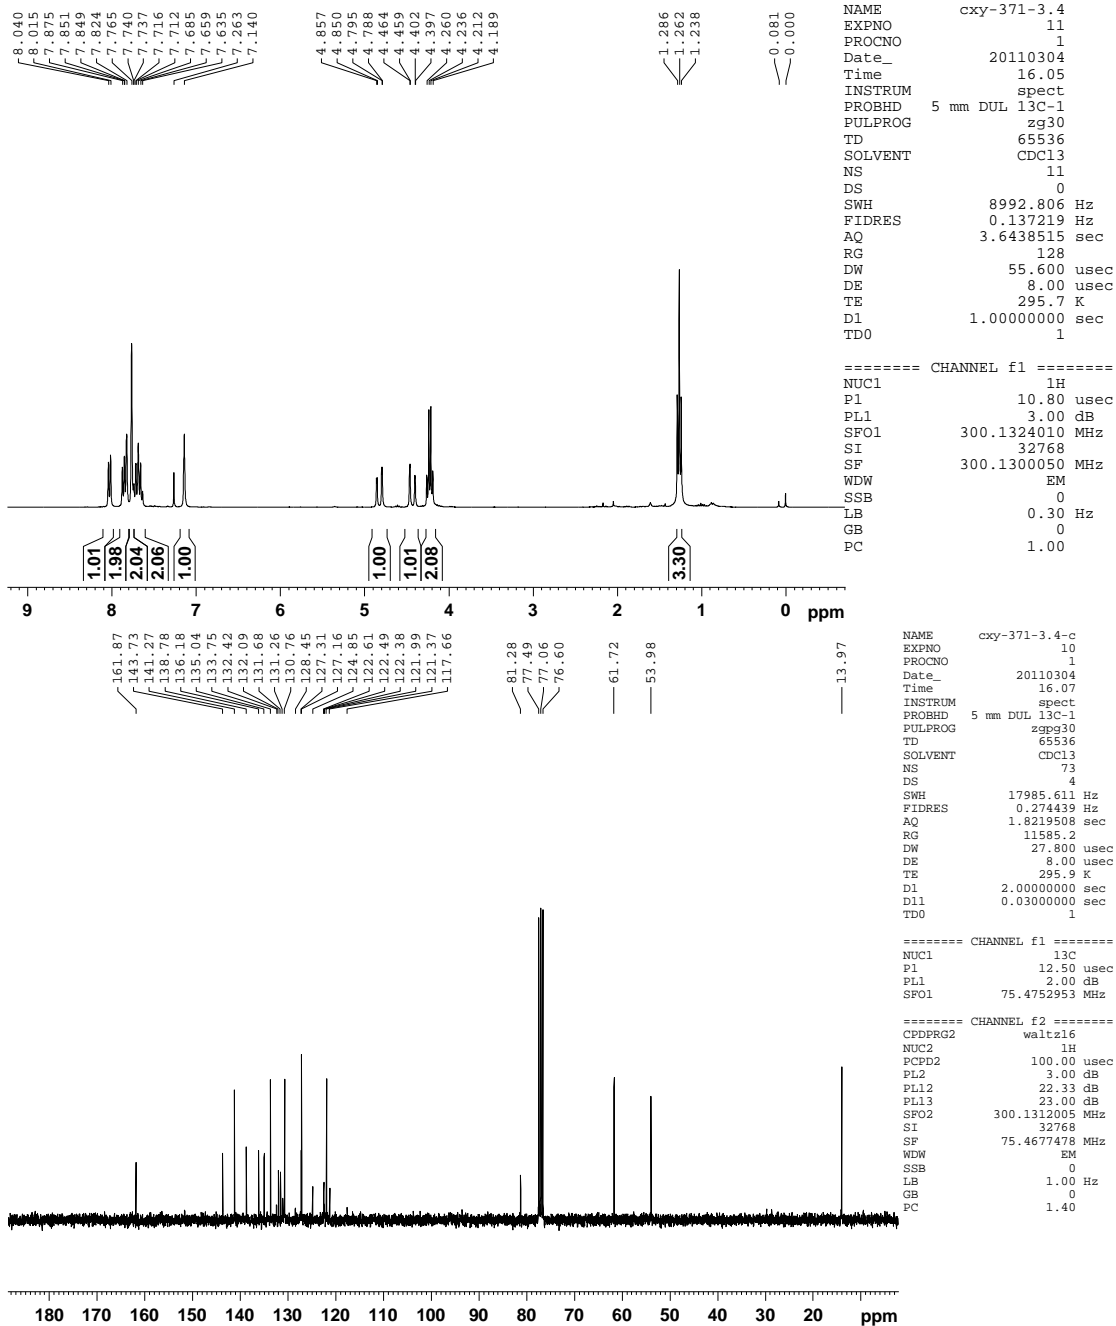

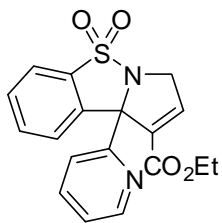

**5i**

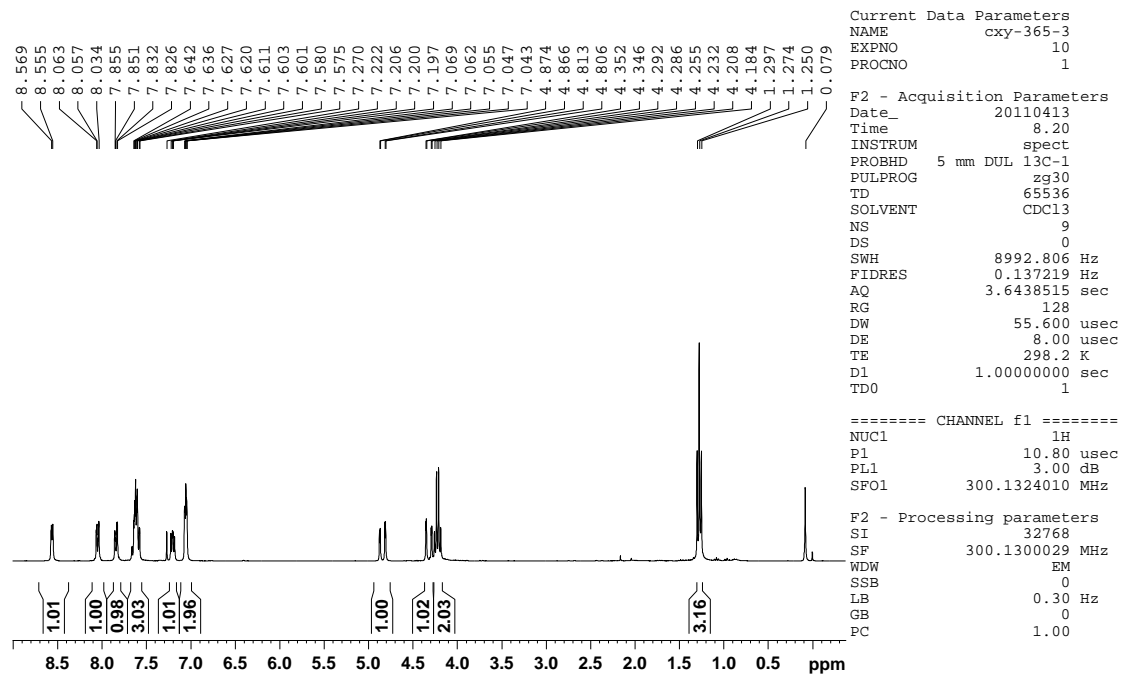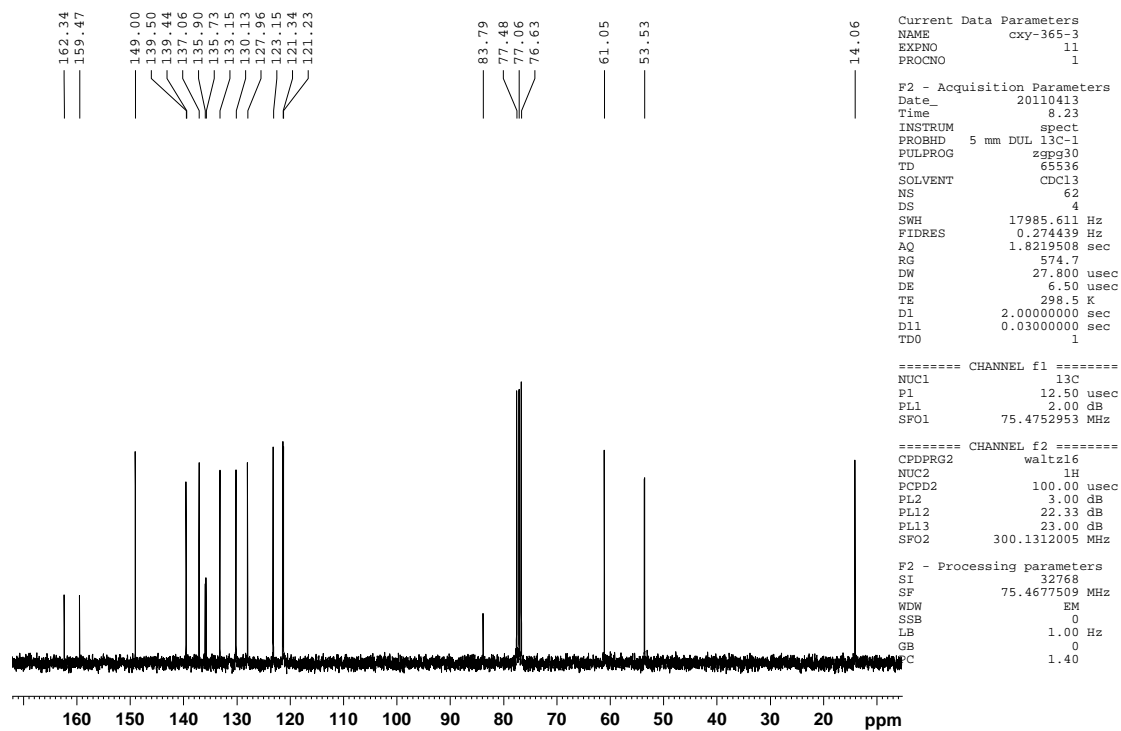



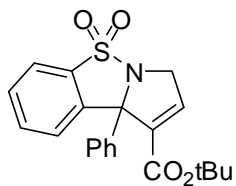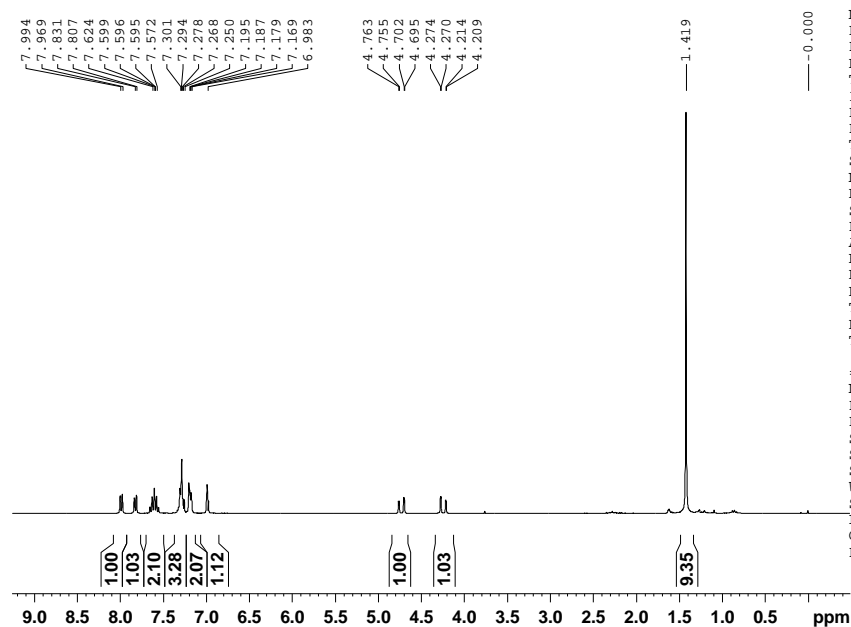

```

NAME      cxy-653-b-tbu
EXPNO     10
PROCNO    1
Date_     20111103
Time      16.22
INSTRUM   spect
PROBHD    5 mm DUL 13C-1
PULPROG   zg30
TD         65536
SOLVENT   CDCl3
NS         8
DS         0
SWH        8992.806 Hz
FIDRES     0.137219 Hz
AQ         3.6438515 sec
RG         71.8
DW         55.600 usec
DE         8.00 usec
TE         298.8 K
D1         1.00000000 sec
TD0        1

===== CHANNEL f1 =====
NUC1       1H
P1         10.80 usec
PL1        3.00 dB
SFO1       300.1324010 MHz
SI         32768
SF         300.1300086 MHz
WDW        EM
SSB        0
LB         0.30 Hz
GB         0
PC         1.00
    
```

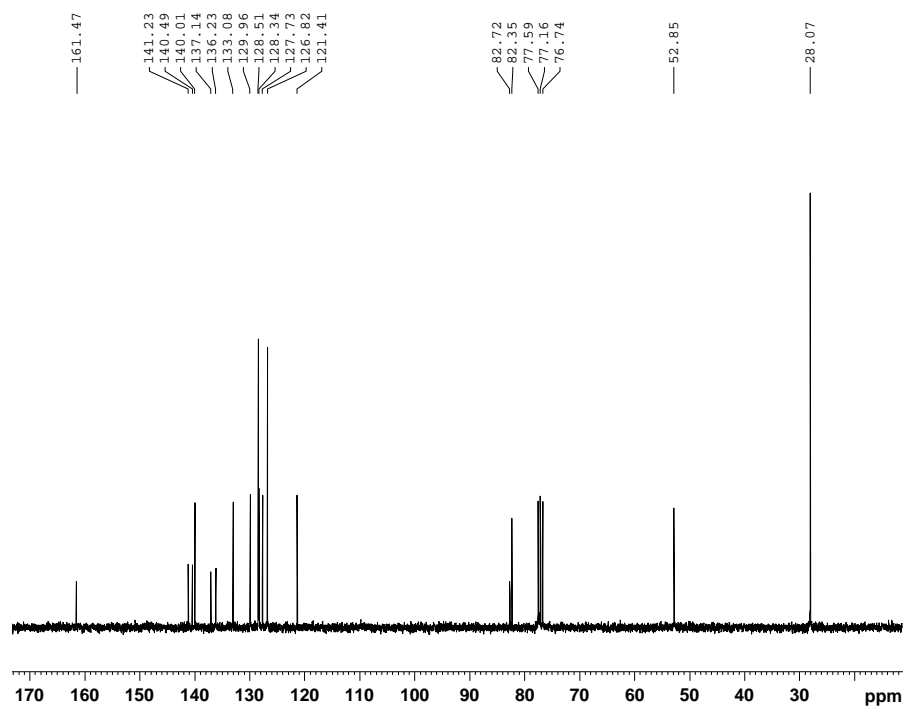

```

NAME      cxy-653-b-tbu
EXPNO     11
PROCNO    1
Date_     20111103
Time      16.26
INSTRUM   spect
PROBHD    5 mm DUL 13C-1
PULPROG   zgpg30
TD         65536
SOLVENT   CDCl3
NS         46
DS         4
SWH        17985.611 Hz
FIDRES     0.274439 Hz
AQ         1.8219508 sec
RG         574.7
DW         27.800 usec
DE         6.50 usec
TE         299.1 K
D1         2.00000000 sec
D11        0.03000000 sec
TD0        1

===== CHANNEL f1 =====
NUC1       13C
P1         12.50 usec
PL1        2.00 dB
SFO1       75.4752953 MHz

===== CHANNEL f2 =====
CPDPRG2   waltz16
NUC2       1H
PCPD2     100.00 usec
PL2        3.00 dB
PL12       22.33 dB
PL13       23.00 dB
SFO2       300.1312005 MHz
SI         32768
SF         75.4677445 MHz
WDW        EM
SSB        0
LB         1.00 Hz
GB         0
PC         1.40
    
```

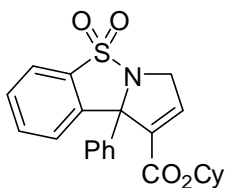

5k

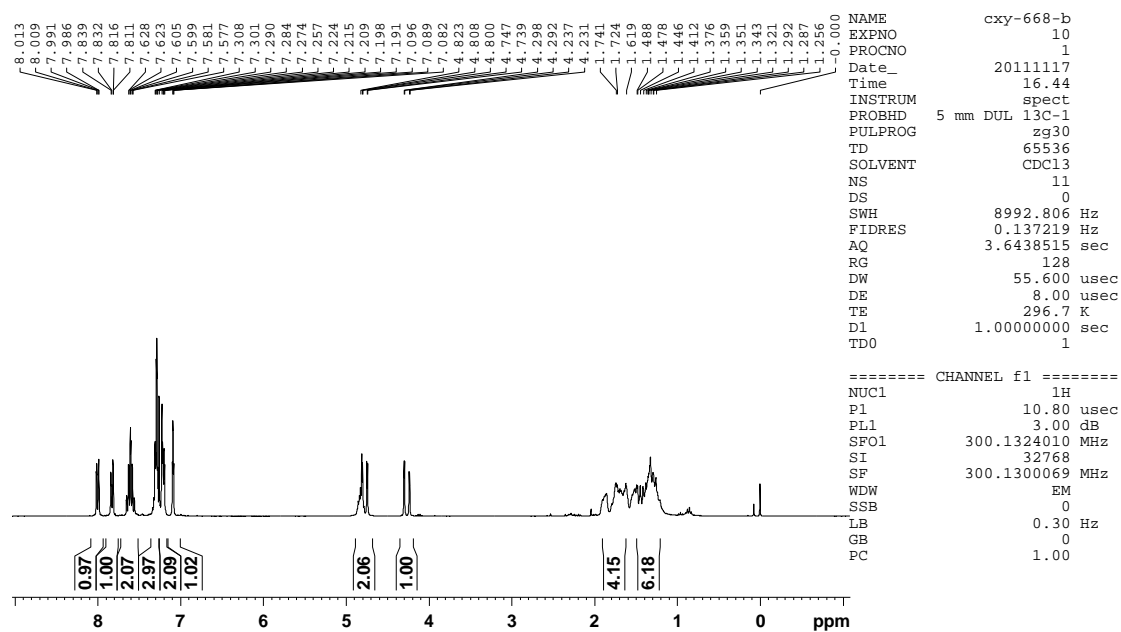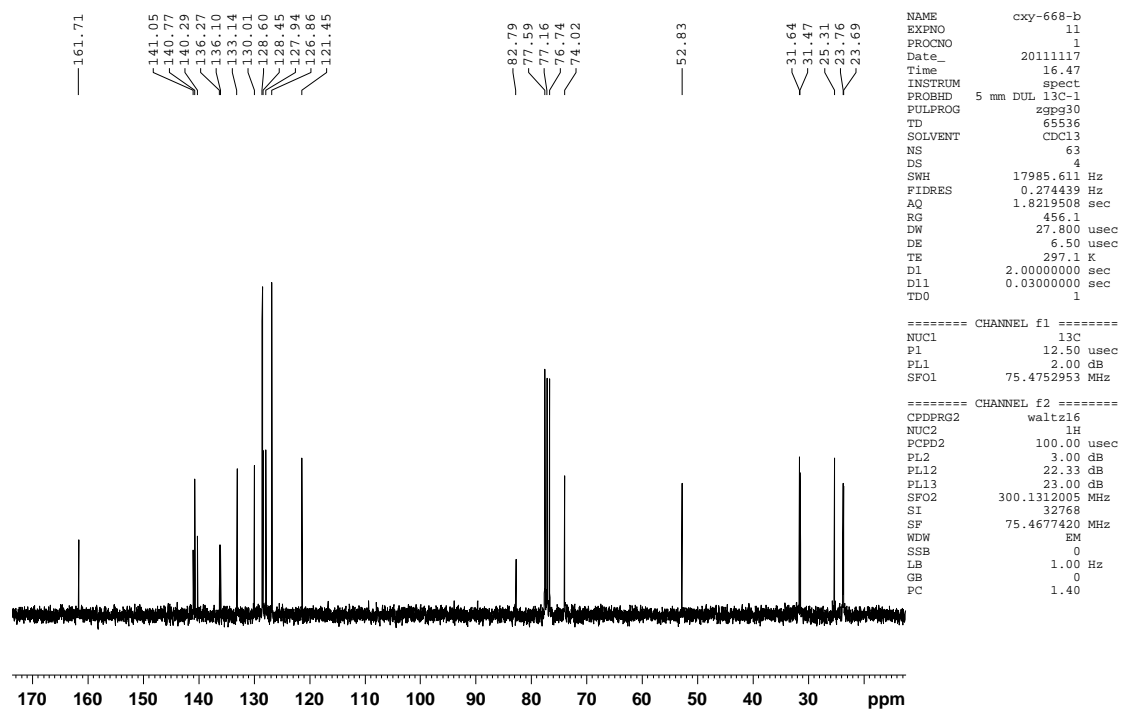

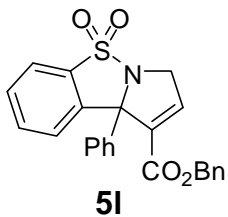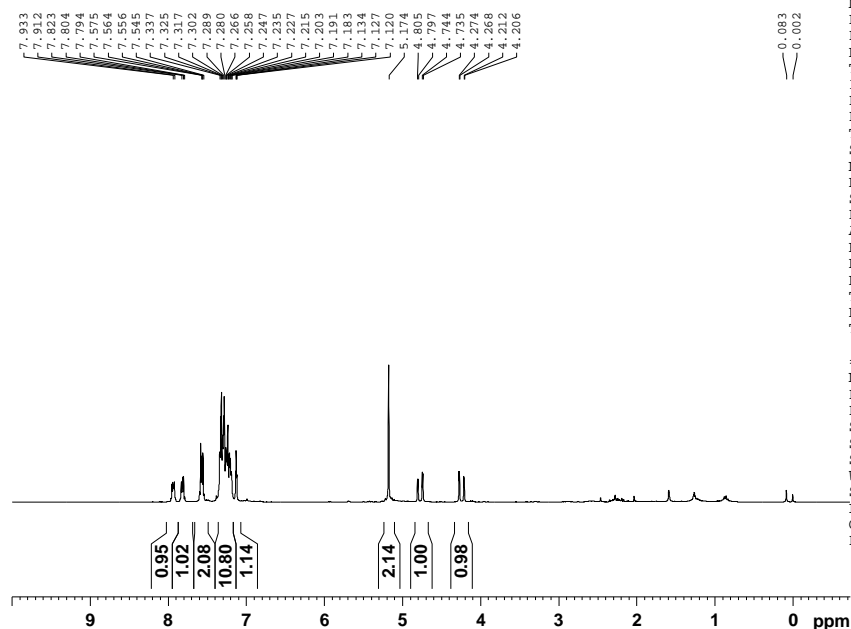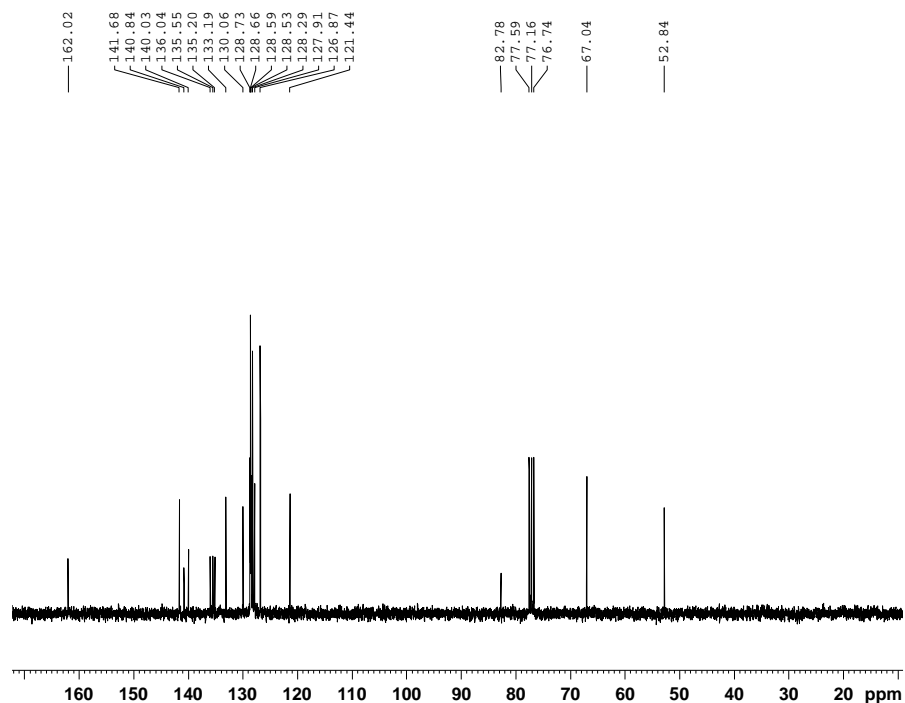

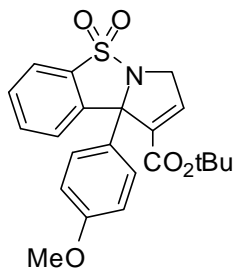

5m

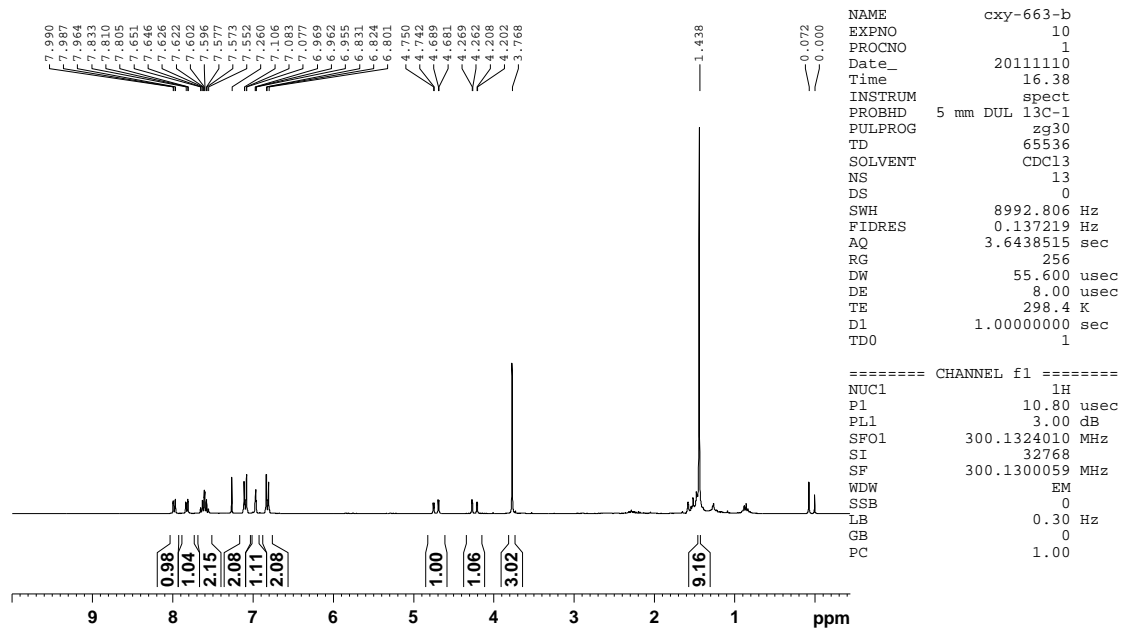

```

NAME          cxy-663-b
EXPNO         10
PROCNO        1
Date_         20111110
Time          16.38
INSTRUM       spect
PROBHD        5 mm DUL 13C-1
PULPROG       zg30
TD            65536
SOLVENT       CDCl3
NS            13
DS            0
SWH           8992.806 Hz
FIDRES        0.137219 Hz
AQ            3.6438515 sec
RG            256
DW            55.600 usec
DE            8.00 usec
TE            298.4 K
D1            1.00000000 sec
TD0           1

===== CHANNEL f1 =====
NUC1          1H
P1            10.80 usec
PL1           3.00 dB
SFO1          300.1324010 MHz
SI            32768
SF            300.1300059 MHz
WDW           EM
SSB           0
LB            0.30 Hz
GB            0
PC            1.00
    
```

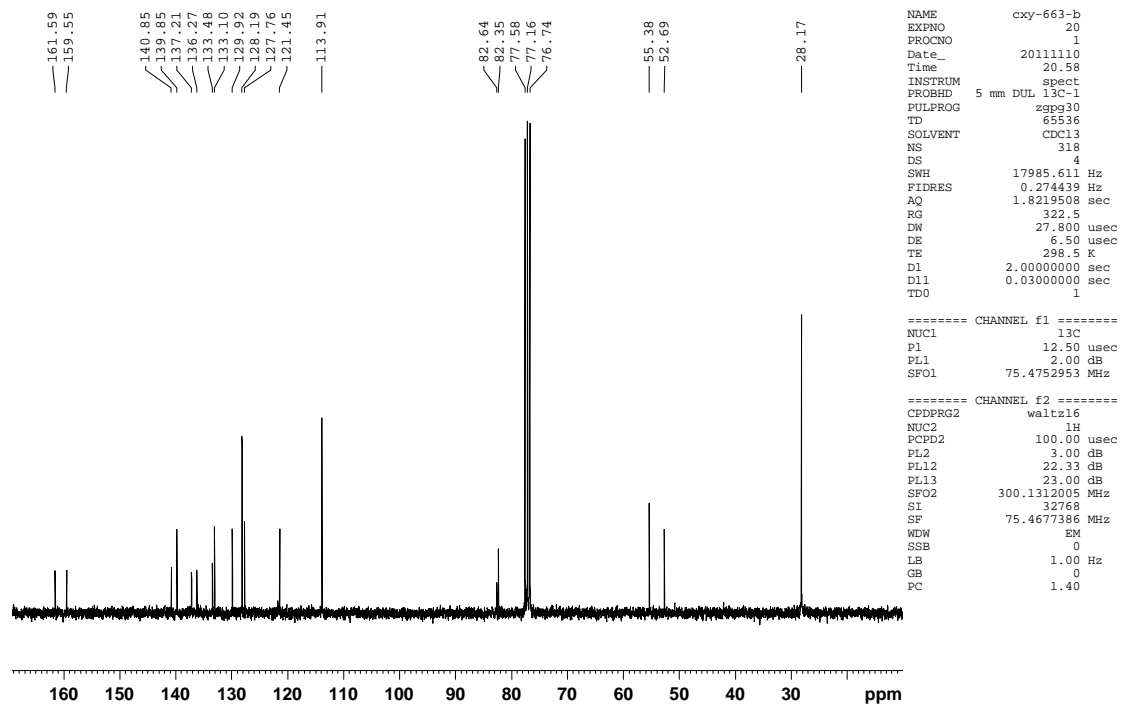

```

NAME          cxy-663-b
EXPNO         20
PROCNO        1
Date_         20111110
Time          20.58
INSTRUM       spect
PROBHD        5 mm DUL 13C-1
PULPROG       zgpg30
TD            65536
SOLVENT       CDCl3
NS            318
DS            4
SWH           17985.611 Hz
FIDRES        0.274439 Hz
AQ            1.8219508 sec
RG            322.5
DW            27.800 usec
DE            6.50 usec
TE            298.5 K
D1            2.00000000 sec
D11           0.03000000 sec
TD0           1

===== CHANNEL f1 =====
NUC1          13C
P1            12.50 usec
PL1           2.00 dB
SFO1          75.4752953 MHz

===== CHANNEL f2 =====
CPDPRG2       waltz16
NUC2          1H
FPCPD2        100.00 usec
PL2           3.00 dB
PL12          22.33 dB
PL13          23.00 dB
SFO2          300.1312005 MHz
SI            32768
SF            75.4677386 MHz
WDW           EM
SSB           0
LB            1.00 Hz
GB            0
PC            1.40
    
```

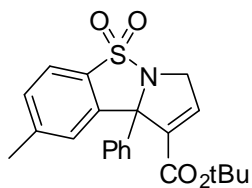

5a'

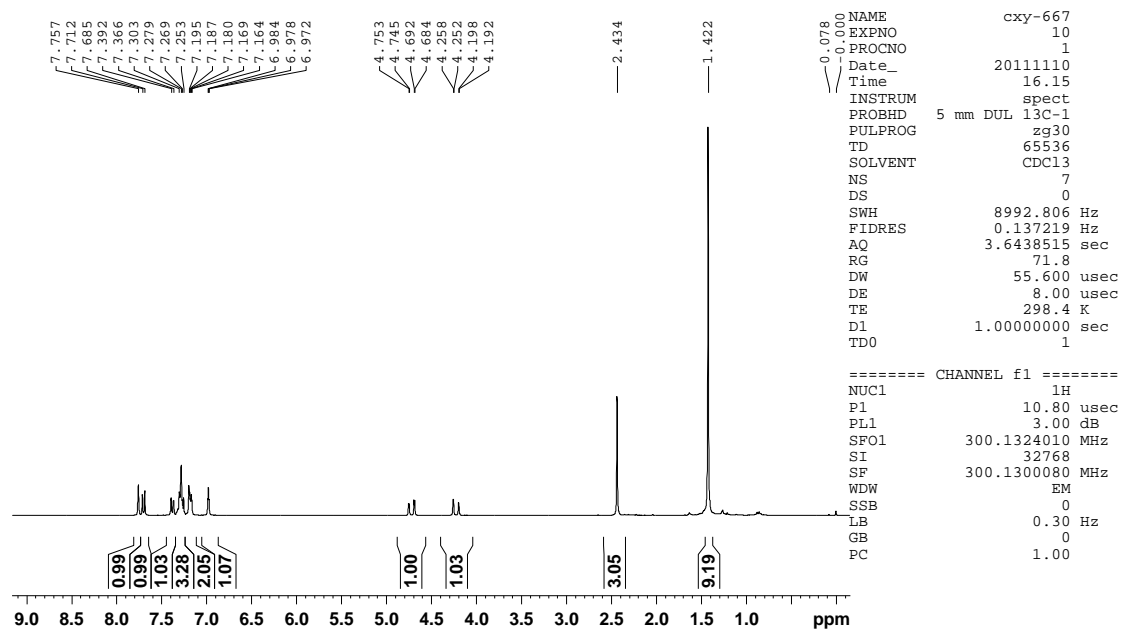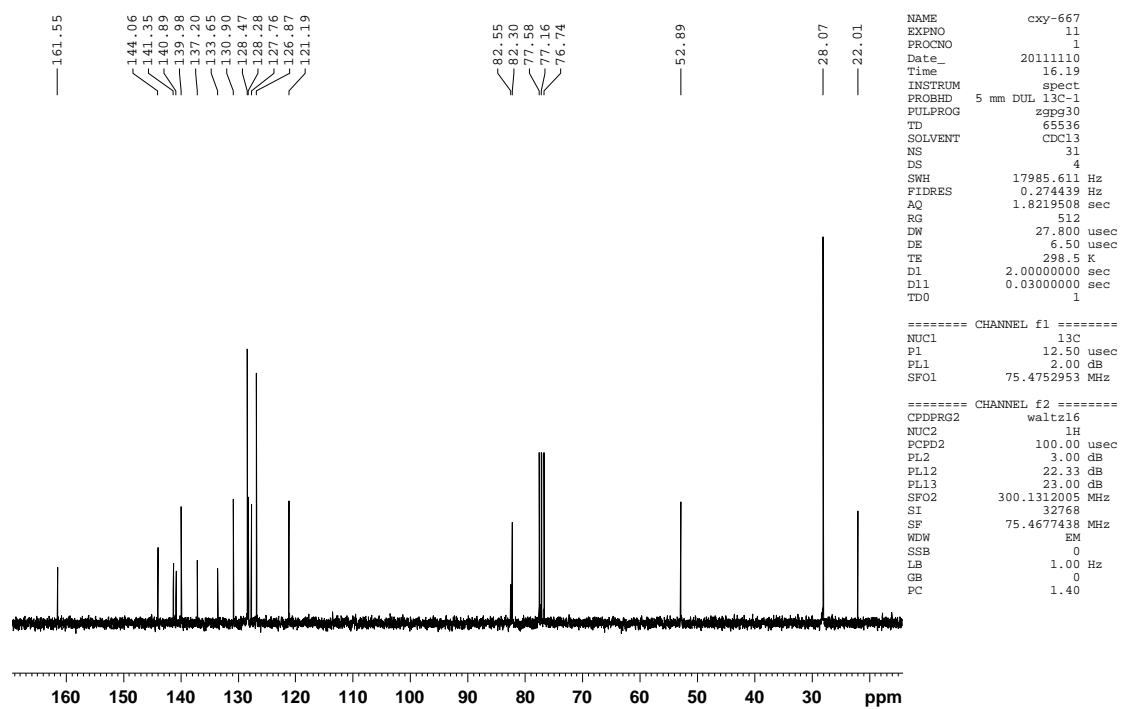

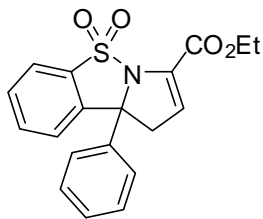

4a

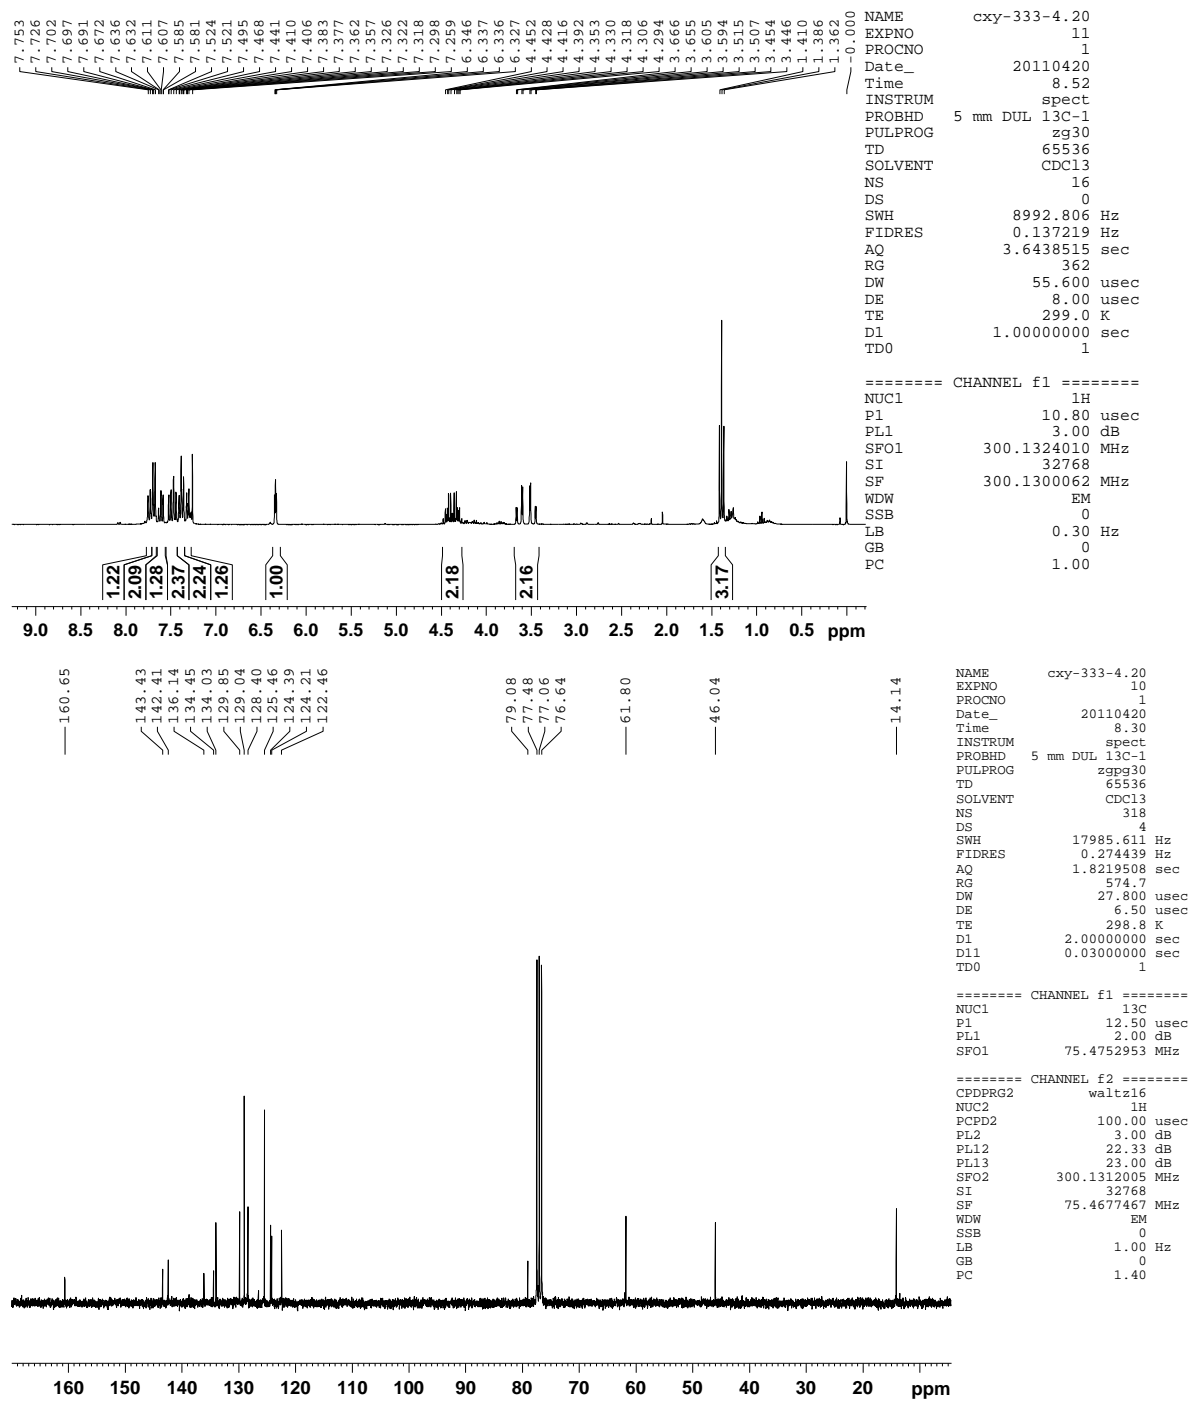

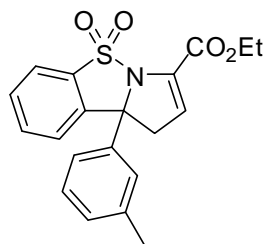

**4f**

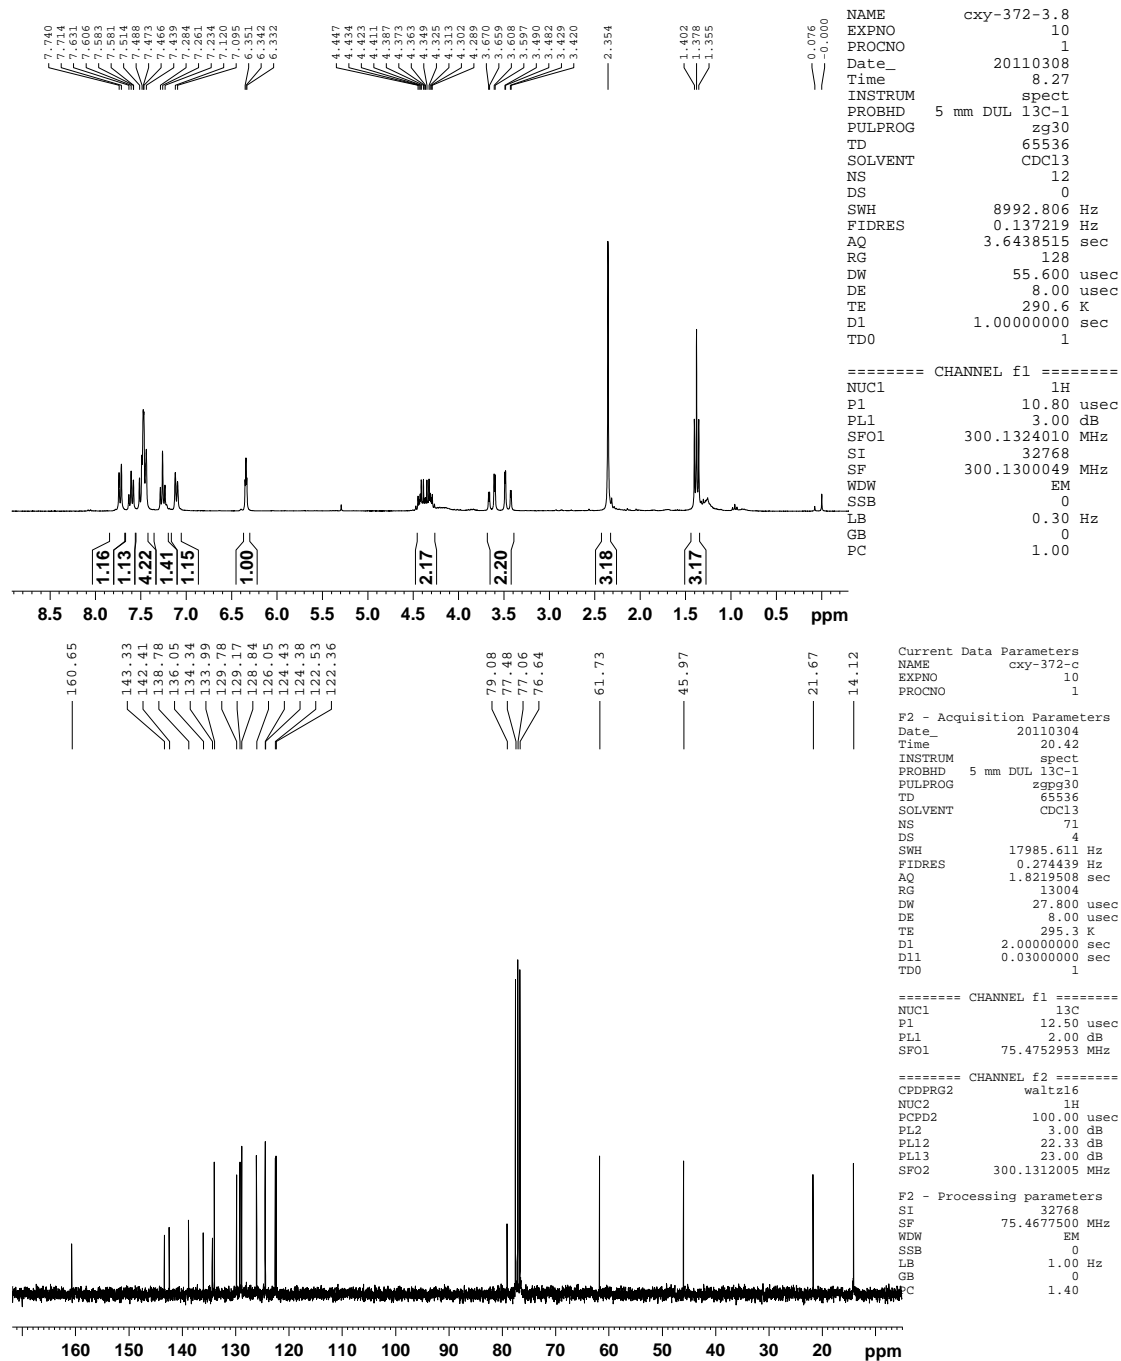

Supplement: c2cc16055b.pdf [file c2cc16055b.pdf]
